# Supplementary material for: Identifying core features of adaptive metabolic mechanisms for chronic heat stress attenuation contributing to systems robustness
Source: Royal Society of Chemistry journal article supplement (doi:10.1039/c2ib00109h), 2012-01-01
Supplement: c2ib00109h_2.pdf [file c2ib00109h_2.pdf]

| Heat Stress Responsive <i>Zostera marina</i> Genes, Northern Population ( $\alpha=0.01$ ) |                                                                                               |
|-------------------------------------------------------------------------------------------|-----------------------------------------------------------------------------------------------|
| METACYC ID                                                                                | Description                                                                                   |
| A0AR23                                                                                    | GO:0004842 (ubiquitin-protein ligase)                                                         |
| A1XQQ5                                                                                    |                                                                                               |
| A1ZA72                                                                                    | GO:0004687 (myosin light chain kinase)                                                        |
| A2AGL8                                                                                    | GO:0004842 (ubiquitin-protein ligase)                                                         |
| A4GNA8                                                                                    | GO:0004609 (phosphatidylserine decarboxylase)                                                 |
| A5WUL6                                                                                    | GO:0004129 (cytochrome-c oxidase)                                                             |
| A6N6K7                                                                                    |                                                                                               |
| A9LDD9                                                                                    | GO:0004372 (glycine hydroxymethyltransferase)                                                 |
| B0BN46                                                                                    | GO:0030267 (glyoxylate reductase (NADP))                                                      |
| B1ANK7                                                                                    |                                                                                               |
| B2R5V5                                                                                    |                                                                                               |
| B3DGQ0                                                                                    | GO:0004842 (ubiquitin-protein ligase)                                                         |
| B4K9W3                                                                                    |                                                                                               |
| O00217                                                                                    | GO:0008137 (NADH dehydrogenase (ubiquinone))                                                  |
| O04130                                                                                    | GO:0004617 (phosphoglycerate dehydrogenase)                                                   |
| O04379                                                                                    | GO:0004521 (endoribonuclease)                                                                 |
| O04905                                                                                    | GO:0009041 (uridylate kinase)                                                                 |
| O04928                                                                                    | GO:0004605 (phosphatidate cytidyltransferase)                                                 |
| O04983                                                                                    | GO:0003989 (acetyl-CoA carboxylase)                                                           |
| O08560                                                                                    | GO:0004143 (diacylglycerol kinase)                                                            |
| O08841                                                                                    |                                                                                               |
| O13696                                                                                    | GO:0004449 (isocitrate dehydrogenase (NAD+))                                                  |
| O13792                                                                                    | GO:0004004 (ATP-dependent RNA helicase)                                                       |
| O13811                                                                                    | GO:0015035 (protein disulfide oxidoreductase)                                                 |
| O13849                                                                                    | GO:0004185 (serine-type carboxypeptidase)                                                     |
| O13877                                                                                    | GO:0003899 (DNA-directed RNA polymerase)                                                      |
| O14122                                                                                    | GO:0004842 (ubiquitin-protein ligase)                                                         |
| O14295                                                                                    | GO:0050236 (pyridoxine 4-dehydrogenase)                                                       |
| O14459                                                                                    | GO:0003899 (DNA-directed RNA polymerase)                                                      |
| O22203                                                                                    | GO:0046409 (p-coumarate 3-hydroxylase)                                                        |
| O22229                                                                                    | GO:0004791 (thioredoxin-disulfide reductase)                                                  |
| O22287                                                                                    | GO:0004475 (mannose-1-phosphate guanylyltransferase)                                          |
| O22446                                                                                    | GO:0004407 (histone deacetylase)                                                              |
| O22609                                                                                    | GO:0008236 (serine-type peptidase)                                                            |
| O22678                                                                                    |                                                                                               |
| O23044                                                                                    | GO:0004601 (peroxidase)                                                                       |
| O23066                                                                                    | GO:0008393 (fatty acid (omega-1)-hydroxylase)                                                 |
| O23141                                                                                    | GO:0008792 (arginine decarboxylase)                                                           |
| O23166                                                                                    | GO:0016671 (oxidoreductase activity, acting on sulfur group of donors, disulfide as acceptor) |
| O23255                                                                                    | GO:0004013 (adenosylhomocysteinase)                                                           |
| O23299                                                                                    | GO:0004165 (dodecenoyl-CoA delta-isomerase)                                                   |
| O23461                                                                                    | GO:0009702 (L-arabinokinase)                                                                  |
| O23627                                                                                    |                                                                                               |
| O23649                                                                                    |                                                                                               |
| O23680                                                                                    | GO:0003924 (GTPase)                                                                           |
| O23722                                                                                    | GO:0004163 (diphosphomevalonate decarboxylase)                                                |

|        |                                                                                               |
|--------|-----------------------------------------------------------------------------------------------|
| O24035 |                                                                                               |
| O24435 | GO:0004672 (protein kinase)                                                                   |
| O24496 | GO:0004416 (hydroxyacylglutathione hydrolase)                                                 |
| O30561 |                                                                                               |
| O34125 |                                                                                               |
| O35940 |                                                                                               |
| O43283 | GO:0004709 (MAP kinase kinase kinase)                                                         |
| O43708 |                                                                                               |
| O48722 | GO:0004392 (heme oxygenase (decyclizing))                                                     |
| O48814 | GO:0016301 (kinase)                                                                           |
| O48962 | GO:0000247 (C-8 sterol isomerase)                                                             |
| O49081 |                                                                                               |
| O49196 | GO:0004020 (adenylylsulfate kinase)                                                           |
| O49213 | GO:0050577 (GDP-L-fucose synthase)                                                            |
| O49354 | GO:0010420 (polyprenyldihydroxybenzoate methyltransferase)                                    |
| O49434 | GO:0047652 (allantoate deiminase)                                                             |
| O49499 | GO:0042409 (caffeoyl-CoA O-methyltransferase)                                                 |
| O49543 | GO:0031071 (cysteine desulfurase)                                                             |
| O49562 | GO:0004721 (phosphoprotein phosphatase)                                                       |
| O50008 | GO:0008705 (methionine synthase)                                                              |
| O55035 | GO:0003755 (peptidyl-prolyl cis-trans isomerase)                                              |
| O55234 | GO:0008233 (peptidase)                                                                        |
| O58651 |                                                                                               |
| O58762 |                                                                                               |
| O59413 |                                                                                               |
| O60078 | GO:0004665 (prephenate dehydrogenase (NADP+))                                                 |
| O60260 | GO:0004842 (ubiquitin-protein ligase)                                                         |
| O60344 | GO:0004222 (metalloendopeptidase)                                                             |
| O60832 | GO:0003720 (telomerase)                                                                       |
| O60869 | GO:0008168 (methyltransferase)                                                                |
| O64425 | GO:0004842 (ubiquitin-protein ligase)                                                         |
| O64437 |                                                                                               |
| O64654 | GO:0016671 (oxidoreductase activity, acting on sulfur group of donors, disulfide as acceptor) |
| O64763 | GO:0004842 (ubiquitin-protein ligase)                                                         |
| O64867 | GO:0004842 (ubiquitin-protein ligase)                                                         |
| O64903 | GO:0004550 (nucleoside diphosphate kinase)                                                    |
| O64925 |                                                                                               |
| O65041 | GO:0019781 (NEDD8 activating enzyme)                                                          |
| O65201 | GO:0003997 (acyl-CoA oxidase)                                                                 |
| O65202 | GO:0003997 (acyl-CoA oxidase)                                                                 |
| O65351 | GO:0004252 (serine-type endopeptidase)                                                        |
| O65572 | GO:0045549 (9-cis-epoxycarotenoid dioxygenase)                                                |
| O67577 |                                                                                               |
| O70196 | GO:0004175 (endopeptidase)                                                                    |
| O73884 |                                                                                               |
| O75251 | GO:0003954 (NADH dehydrogenase)                                                               |
| O75575 | GO:0003899 (DNA-directed RNA polymerase)                                                      |
| O80013 |                                                                                               |

|        |                                                                                                                |
|--------|----------------------------------------------------------------------------------------------------------------|
| O80433 |                                                                                                                |
| O80452 | GO:0003876 (AMP deaminase)                                                                                     |
| O80477 | GO:0016788 (hydrolase activity, acting on ester bonds)                                                         |
| O80673 | GO:0004683 (calmodulin-dependent protein kinase)                                                               |
| O80725 | GO:0008559 (xenobiotic-transporting ATPase)                                                                    |
| O80840 | GO:0004615 (phosphomannomutase)                                                                                |
| O80860 |                                                                                                                |
| O81108 | GO:0005388 (calcium-transporting ATPase)                                                                       |
| O81129 | GO:0004430 (1-phosphatidylinositol 4-kinase)                                                                   |
| O81235 | GO:0004784 (superoxide dismutase)                                                                              |
| O81413 |                                                                                                                |
| O81635 | GO:0016887 (ATPase)                                                                                            |
| O81646 |                                                                                                                |
| O81770 | GO:0046509 (1,2-diacylglycerol 3-beta-galactosyltransferase)                                                   |
| O81884 | GO:0010349 (L-galactose dehydrogenase)                                                                         |
| O82030 |                                                                                                                |
| O82110 |                                                                                                                |
| O82261 | GO:0004252 (serine-type endopeptidase)                                                                         |
| O82413 |                                                                                                                |
| O82462 |                                                                                                                |
| O82768 | GO:0004636 (phosphoribosyl-ATP diphosphatase)                                                                  |
| O82782 | GO:0003949 (1-(5-phosphoribosyl)-5-[(5-phosphoribosylamino)methylideneamino]imidazole-4-carboxamide isomerase) |
| O82796 | GO:0004647 (phosphoserine phosphatase)                                                                         |
| O88738 | GO:0004842 (ubiquitin-protein ligase)                                                                          |
| O88766 | GO:0008237 (metallopeptidase)                                                                                  |
| O94616 | GO:0003899 (DNA-directed RNA polymerase)                                                                       |
| O94710 | GO:0004252 (serine-type endopeptidase)                                                                         |
| O95271 | GO:0003950 (NAD+ ADP-ribosyltransferase)                                                                       |
| O95336 |                                                                                                                |
| O95363 | GO:0004826 (phenylalanine-tRNA ligase)                                                                         |
| O95391 | GO:0000386 (second spliceosomal transesterification)                                                           |
| O95476 | GO:0004722 (protein serine/threonine phosphatase)                                                              |
| O96780 |                                                                                                                |
| O96787 |                                                                                                                |
| O96788 |                                                                                                                |
| O97159 | GO:0016887 (ATPase)                                                                                            |
| P00163 | GO:0045153 (electron transporter, transferring electrons within CoQH2-cytochrome c reductase complex)          |
| P00401 | GO:0004129 (cytochrome-c oxidase)                                                                              |
| P00560 | GO:0004618 (phosphoglycerate kinase)                                                                           |
| P00582 |                                                                                                                |
| P00956 |                                                                                                                |
| P02563 | GO:0030899 (calcium-dependent ATPase)                                                                          |
| P02829 | GO:0042623 (ATPase activity, coupled)                                                                          |
| P02992 | GO:0003924 (GTPase)                                                                                            |
| P03355 |                                                                                                                |
| P04801 | GO:0004829 (threonine-tRNA ligase)                                                                             |

|        |                                                                                                       |
|--------|-------------------------------------------------------------------------------------------------------|
| P04802 | GO:0004815 (aspartate-tRNA ligase)                                                                    |
| P04805 |                                                                                                       |
| P04825 |                                                                                                       |
| P05149 |                                                                                                       |
| P05314 |                                                                                                       |
| P05466 | GO:0003866 (3-phosphoshikimate 1-carboxyvinyltransferase)                                             |
| P05895 |                                                                                                       |
| P06576 | GO:0046961 (hydrogen ion transporting ATPase activity, rotational mechanism)                          |
| P06634 | GO:0003724 (RNA helicase)                                                                             |
| P07143 | GO:0045153 (electron transporter, transferring electrons within CoQH2-cytochrome c reductase complex) |
| P07245 | GO:0004488 (methylenetetrahydrofolate dehydrogenase (NADP+))                                          |
| P07251 | GO:0016887 (ATPase)                                                                                   |
| P07284 | GO:0004828 (serine-tRNA ligase)                                                                       |
| P07560 | GO:0003924 (GTPase)                                                                                   |
| P07639 |                                                                                                       |
| P07649 |                                                                                                       |
| P07858 | GO:0008233 (peptidase)                                                                                |
| P07991 |                                                                                                       |
| P08678 | GO:0004016 (adenylate cyclase)                                                                        |
| P0A3C9 | GO:0009055 (electron carrier)                                                                         |
| P0A6A0 |                                                                                                       |
| P0A6K3 |                                                                                                       |
| P0A7A2 |                                                                                                       |
| P0A850 |                                                                                                       |
| P0A8F4 |                                                                                                       |
| P0A8Y1 |                                                                                                       |
| P0A8Y5 |                                                                                                       |
| P0A9L5 |                                                                                                       |
| P0A9P9 |                                                                                                       |
| P0AB65 |                                                                                                       |
| P0AB89 |                                                                                                       |
| P0ABQ2 |                                                                                                       |
| P0ABU0 |                                                                                                       |
| P0ACC1 |                                                                                                       |
| P0ADF6 |                                                                                                       |
| P0AEH1 |                                                                                                       |
| P0AEI1 |                                                                                                       |
| P0AERO |                                                                                                       |
| P0AG24 |                                                                                                       |
| P0C028 | GO:0008486 (diphosphoinositol-polyphosphate diphosphatase)                                            |
| P10507 | GO:0004222 (metalloendopeptidase)                                                                     |
| P10591 | GO:0016887 (ATPase)                                                                                   |
| P10742 |                                                                                                       |
| P11017 | GO:0003924 (GTPase)                                                                                   |
| P11035 | GO:0009703 (nitrate reductase (NADH))                                                                 |
| P11155 |                                                                                                       |
| P11875 |                                                                                                       |

|        |                                                                              |
|--------|------------------------------------------------------------------------------|
| P11914 | GO:0004222 (metalloendopeptidase)                                            |
| P12340 |                                                                              |
| P12398 | GO:0016887 (ATPase)                                                          |
| P12412 |                                                                              |
| P13433 | GO:0003899 (DNA-directed RNA polymerase)                                     |
| P13650 |                                                                              |
| P14605 | GO:0004016 (adenylate cyclase)                                               |
| P14654 |                                                                              |
| P14656 |                                                                              |
| P14671 | GO:0004834 (tryptophan synthase)                                             |
| P15347 |                                                                              |
| P15367 | GO:0008233 (peptidase)                                                       |
| P15454 | GO:0004385 (guanylate kinase)                                                |
| P15565 | GO:0004809 (tRNA (guanine-N2-)-methyltransferase)                            |
| P15873 | GO:0030337 (DNA polymerase processivity factor)                              |
| P16127 | GO:0016887 (ATPase)                                                          |
| P16140 | GO:0046961 (hydrogen ion transporting ATPase activity, rotational mechanism) |
| P17597 | GO:0003984 (acetolactate synthase)                                           |
| P17606 |                                                                              |
| P17751 | GO:0016853 (isomerase)                                                       |
| P17784 | GO:0004332 (fructose-bisphosphate aldolase)                                  |
| P18203 | GO:0003755 (peptidyl-prolyl cis-trans isomerase)                             |
| P18769 |                                                                              |
| P18899 | GO:0016887 (ATPase)                                                          |
| P19146 | GO:0003924 (GTPase)                                                          |
| P19171 | GO:0004568 (chitinase)                                                       |
| P19404 | GO:0008137 (NADH dehydrogenase (ubiquinone))                                 |
| P19456 | GO:0008553 (hydrogen-exporting ATPase activity, phosphorylative mechanism)   |
| P19734 | GO:0018662 (phenol 2-monooxygenase)                                          |
| P19882 | GO:0016887 (ATPase)                                                          |
| P20081 | GO:0003755 (peptidyl-prolyl cis-trans isomerase)                             |
| P20447 | GO:0008186 (RNA-dependent ATPase)                                            |
| P20606 | GO:0003924 (GTPase)                                                          |
| P20649 | GO:0016887 (ATPase)                                                          |
| P21128 | GO:0008236 (serine-type peptidase)                                           |
| P21461 | GO:0016874 (ligase)                                                          |
| P21888 |                                                                              |
| P22146 | GO:0042124 (1,3-beta-glucanosyltransferase)                                  |
| P22337 |                                                                              |
| P22579 | GO:0004407 (histone deacetylase)                                             |
| P22894 | GO:0004252 (serine-type endopeptidase)                                       |
| P23111 |                                                                              |
| P23321 | GO:0010242 (oxygen evolving)                                                 |
| P23396 | GO:0004519 (endonuclease)                                                    |
| P23686 | GO:0004478 (methionine adenosyltransferase)                                  |
| P23968 | GO:0008553 (hydrogen-exporting ATPase activity, phosphorylative mechanism)   |

|        |                                                                                               |
|--------|-----------------------------------------------------------------------------------------------|
| P24101 | GO:0004601 (peroxidase)                                                                       |
| P24155 | GO:0008233 (peptidase)                                                                        |
| P24384 | GO:0000386 (second spliceosomal transesterification)                                          |
| P24704 | GO:0004784 (superoxide dismutase)                                                             |
| P24788 |                                                                                               |
| P25038 | GO:0003924 (GTPase)                                                                           |
| P25087 | GO:0003838 (sterol 24-C-methyltransferase)                                                    |
| P25161 | GO:0004175 (endopeptidase)                                                                    |
| P25296 | GO:0004723 (calcium-dependent protein serine/threonine phosphatase)                           |
| P25372 | GO:0015036 (disulfide oxidoreductase)                                                         |
| P25582 | GO:0016435 (rRNA (guanine) methyltransferase)                                                 |
| P25656 | GO:0004012 (phospholipid-translocating ATPase)                                                |
| P25694 | GO:0016887 (ATPase)                                                                           |
| P25704 |                                                                                               |
| P25819 | GO:0004096 (catalase)                                                                         |
| P25856 |                                                                                               |
| P25857 |                                                                                               |
| P26221 |                                                                                               |
| P26270 | GO:0004175 (endopeptidase)                                                                    |
| P26640 | GO:0004832 (valine-tRNA ligase)                                                               |
| P27298 |                                                                                               |
| P28331 | GO:0008137 (NADH dehydrogenase (ubiquinone))                                                  |
| P28337 |                                                                                               |
| P28777 | GO:0042602 (flavin reductase)                                                                 |
| P29029 | GO:0008843 (endochitinase)                                                                    |
| P29102 |                                                                                               |
| P29218 | GO:0008934 (inositol-1(or 4)-monophosphatase)                                                 |
| P29250 | GO:0016165 (lipoxygenase)                                                                     |
| P29448 | GO:0016671 (oxidoreductase activity, acting on sulfur group of donors, disulfide as acceptor) |
| P30041 | GO:0004623 (phospholipase A2)                                                                 |
| P30044 | GO:0004601 (peroxidase)                                                                       |
| P30136 |                                                                                               |
| P30792 |                                                                                               |
| P31040 | GO:0000104 (succinate dehydrogenase)                                                          |
| P31166 | GO:0003999 (adenine phosphoribosyltransferase)                                                |
| P31244 | GO:0008094 (DNA-dependent ATPase)                                                             |
| P31383 | GO:0004722 (protein serine/threonine phosphatase)                                             |
| P31384 | GO:0000175 (3'-5'-exoribonuclease)                                                            |
| P31414 | GO:0009678 (hydrogen-translocating pyrophosphatase)                                           |
| P32381 | GO:0016887 (ATPase)                                                                           |
| P32469 | GO:0004164 (diphthine synthase)                                                               |
| P32473 | GO:0004739 (pyruvate dehydrogenase (acetyl-transferring))                                     |
| P32642 | GO:0015036 (disulfide oxidoreductase)                                                         |
| P32660 | GO:0004012 (phospholipid-translocating ATPase)                                                |
| P32835 | GO:0003924 (GTPase)                                                                           |
| P32836 | GO:0003924 (GTPase)                                                                           |
| P33363 |                                                                                               |
| P33643 |                                                                                               |

|        |                                                                                     |
|--------|-------------------------------------------------------------------------------------|
| P34047 | GO:0004424 (imidazoleglycerol-phosphate dehydratase)                                |
| P34099 |                                                                                     |
| P34243 | GO:0043141 (ATP-dependent 5'-3' DNA helicase)                                       |
| P34314 | GO:0004674 (protein serine/threonine kinase)                                        |
| P34525 |                                                                                     |
| P34790 |                                                                                     |
| P34791 | GO:0003755 (peptidyl-prolyl cis-trans isomerase)                                    |
| P34896 | GO:0004372 (glycine hydroxymethyltransferase)                                       |
| P34897 | GO:0004372 (glycine hydroxymethyltransferase)                                       |
| P34909 | GO:0004842 (ubiquitin-protein ligase)                                               |
| P35055 |                                                                                     |
| P35132 | GO:0004842 (ubiquitin-protein ligase)                                               |
| P35134 | GO:0004842 (ubiquitin-protein ligase)                                               |
| P35434 | GO:0016887 (ATPase)                                                                 |
| P35510 |                                                                                     |
| P35580 | GO:0030898 (actin-dependent ATPase)                                                 |
| P35999 | GO:0004222 (metalloendopeptidase)                                                   |
| P36048 | GO:0003924 (GTPase)                                                                 |
| P36096 | GO:0004842 (ubiquitin-protein ligase)                                               |
| P36104 | GO:0042800 (histone lysine N-methyltransferase activity (H3-K4 specific))           |
| P36163 | GO:0004222 (metalloendopeptidase)                                                   |
| P36542 | GO:0016887 (ATPase)                                                                 |
| P36590 | GO:0004798 (thymidylate kinase)                                                     |
| P36591 | GO:0004146 (dihydrofolate reductase)                                                |
| P36872 | GO:0004722 (protein serine/threonine phosphatase)                                   |
| P37271 |                                                                                     |
| P38077 | GO:0016887 (ATPase)                                                                 |
| P38109 | GO:0017171 (serine hydrolase)                                                       |
| P38116 | GO:0003924 (GTPase)                                                                 |
| P38143 | GO:0047066 (phospholipid-hydroperoxide glutathione peroxidase)                      |
| P38197 | GO:0008784 (alanine racemase)                                                       |
| P38205 | GO:0016428 (tRNA (cytosine-5-)-methyltransferase)                                   |
| P38219 | GO:0016887 (ATPase)                                                                 |
| P38238 | GO:0008175 (tRNA methyltransferase)                                                 |
| P38242 | GO:0004577 (N-acetylglucosaminyl diphosphodolichol N-acetylglucosaminyltransferase) |
| P38307 | GO:0008233 (peptidase)                                                              |
| P38316 | GO:0019776 (Atg8 ligase)                                                            |
| P38418 | GO:0016165 (lipoxygenase)                                                           |
| P38555 | GO:0003924 (GTPase)                                                                 |
| P38629 | GO:0016887 (ATPase)                                                                 |
| P38659 | GO:0003756 (protein disulfide isomerase)                                            |
| P38712 | GO:0008186 (RNA-dependent ATPase)                                                   |
| P38719 | GO:0016887 (ATPase)                                                                 |
| P38793 | GO:0016423 (tRNA (guanine) methyltransferase)                                       |
| P38797 | GO:0004722 (protein serine/threonine phosphatase)                                   |
| P38806 | GO:0043166 (H4/H2A histone acetyltransferase)                                       |
| P38911 | GO:0003755 (peptidyl-prolyl cis-trans isomerase)                                    |
| P38989 | GO:0016887 (ATPase)                                                                 |

|        |                                                                         |
|--------|-------------------------------------------------------------------------|
| P39206 |                                                                         |
| P39286 |                                                                         |
| P39517 | GO:0003724 (RNA helicase)                                               |
| P39524 | GO:0004012 (phospholipid-translocating ATPase)                          |
| P39656 | GO:0004579 (dolichyl-diphosphooligosaccharide-protein glycotransferase) |
| P39726 | GO:0004375 (glycine dehydrogenase (decarboxylating))                    |
| P39730 | GO:0003924 (GTPase)                                                     |
| P40024 | GO:0042624 (ATPase activity, uncoupled)                                 |
| P40025 |                                                                         |
| P40312 | GO:0009055 (electron carrier)                                           |
| P40318 | GO:0004842 (ubiquitin-protein ligase)                                   |
| P40350 | GO:0004581 (dolichyl-phosphate beta-glucosyltransferase)                |
| P40507 | GO:0004652 (polynucleotide adenyltransferase)                           |
| P40581 | GO:0047066 (phospholipid-hydroperoxide glutathione peroxidase)          |
| P40945 | GO:0003956 (NAD(P)+-protein-arginine ADP-ribosyltransferase)            |
| P40946 | GO:0003956 (NAD(P)+-protein-arginine ADP-ribosyltransferase)            |
| P41409 |                                                                         |
| P41543 | GO:0004579 (dolichyl-diphosphooligosaccharide-protein glycotransferase) |
| P41759 | GO:0004618 (phosphoglycerate kinase)                                    |
| P41888 | GO:0004788 (thiamin diphosphokinase)                                    |
| P41892 | GO:0004674 (protein serine/threonine kinase)                            |
| P42697 | GO:0003924 (GTPase)                                                     |
| P42738 | GO:0004106 (chorismate mutase)                                          |
| P42744 | GO:0008641 (small protein activating enzyme)                            |
| P42745 | GO:0004842 (ubiquitin-protein ligase)                                   |
| P42748 | GO:0004842 (ubiquitin-protein ligase)                                   |
| P42770 | GO:0004362 (glutathione-disulfide reductase)                            |
| P42799 | GO:0042286 (glutamate-1-semialdehyde 2,1-aminomutase)                   |
| P42804 | GO:0008883 (glutamyl-tRNA reductase)                                    |
| P42862 | GO:0016853 (isomerase)                                                  |
| P43254 | GO:0004842 (ubiquitin-protein ligase)                                   |
| P43288 |                                                                         |
| P43294 |                                                                         |
| P43311 |                                                                         |
| P43558 | GO:0004843 (ubiquitin-specific protease)                                |
| P45724 |                                                                         |
| P45725 |                                                                         |
| P45844 | GO:0034041 (sterol-transporting ATPase)                                 |
| P46014 | GO:0004721 (phosphoprotein phosphatase)                                 |
| P46283 | GO:0050278 (sedoheptulose-bisphosphatase)                               |
| P46309 | GO:0004357 (glutamate-cysteine ligase)                                  |
| P46310 | GO:0042389 (omega-3 fatty acid desaturase)                              |
| P46421 | GO:0004364 (glutathione transferase)                                    |
| P46422 | GO:0004364 (glutathione transferase)                                    |
| P46462 | GO:0016887 (ATPase)                                                     |
| P46573 |                                                                         |
| P46643 | GO:0004069 (aspartate transaminase)                                     |
| P46644 | GO:0004069 (aspartate transaminase)                                     |
| P46645 | GO:0004069 (aspartate transaminase)                                     |



|        |                                                                              |
|--------|------------------------------------------------------------------------------|
| P46852 |                                                                              |
| P46875 | GO:0016887 (ATPase)                                                          |
| P46934 | GO:0004842 (ubiquitin-protein ligase)                                        |
| P46943 | GO:0003924 (GTPase)                                                          |
| P47052 | GO:0008177 (succinate dehydrogenase (ubiquinone))                            |
| P47058 | GO:0008251 (tRNA-specific adenosine deaminase)                               |
| P47122 | GO:0016887 (ATPase)                                                          |
| P47735 |                                                                              |
| P47938 | GO:0015036 (disulfide oxidoreductase)                                        |
| P47968 | GO:0004751 (ribose-5-phosphate isomerase)                                    |
| P48047 | GO:0016887 (ATPase)                                                          |
| P48163 | GO:0004473 (malate dehydrogenase (oxaloacetate-decarboxylating) (NADP+))     |
| P48491 | GO:0004807 (triose-phosphate isomerase)                                      |
| P48622 | GO:0042389 (omega-3 fatty acid desaturase)                                   |
| P48623 | GO:0042389 (omega-3 fatty acid desaturase)                                   |
| P48642 |                                                                              |
| P49017 | GO:0043334 (2-hexaprenyl-6-methoxy-1,4-benzoquinone methyltransferase)       |
| P49095 | GO:0004375 (glycine dehydrogenase (decarboxylating))                         |
| P49432 | GO:0004739 (pyruvate dehydrogenase (acetyl-transferring))                    |
| P49572 | GO:0004425 (indole-3-glycerol-phosphate synthase)                            |
| P49598 | GO:0004722 (protein serine/threonine phosphatase)                            |
| P50076 | GO:0004583 (dolichyl-phosphate-glucose-glycolipid alpha-glucosyltransferase) |
| P50107 | GO:0004462 (lactoylglutathione lyase)                                        |
| P50162 |                                                                              |
| P50947 | GO:0004407 (histone deacetylase)                                             |
| P51139 |                                                                              |
| P51566 |                                                                              |
| P51996 | GO:0003924 (GTPase)                                                          |
| P52286 | GO:0004842 (ubiquitin-protein ligase)                                        |
| P52422 | GO:0004644 (phosphoribosylglycinamide formyltransferase)                     |
| P52424 |                                                                              |
| P52480 | GO:0004743 (pyruvate kinase)                                                 |
| P52701 | GO:0016887 (ATPase)                                                          |
| P52917 | GO:0016887 (ATPase)                                                          |
| P52920 | GO:0016887 (ATPase)                                                          |
| P53197 | GO:0004842 (ubiquitin-protein ligase)                                        |
| P53259 | GO:0008233 (peptidase)                                                       |
| P53312 | GO:0004775 (succinate-CoA ligase (ADP-forming))                              |
| P53549 | GO:0016887 (ATPase)                                                          |
| P53598 | GO:0004775 (succinate-CoA ligase (ADP-forming))                              |
| P53611 |                                                                              |
| P53666 |                                                                              |
| P53738 | GO:0008276 (protein methyltransferase)                                       |
| P53739 | GO:0004672 (protein kinase)                                                  |
| P53759 | GO:0017150 (tRNA dihydrouridine synthase)                                    |
| P53893 | GO:0003924 (GTPase)                                                          |

|        |                                                                     |
|--------|---------------------------------------------------------------------|
| P53930 |                                                                     |
| P53946 | GO:0043140 (ATP-dependent 3'-5' DNA helicase)                       |
| P54071 | GO:0004450 (isocitrate dehydrogenase (NADP+))                       |
| P54150 |                                                                     |
| P54263 | GO:0004816 (asparagine-tRNA ligase)                                 |
| P54416 |                                                                     |
| P54873 | GO:0004421 (hydroxymethylglutaryl-CoA synthase)                     |
| P54904 | GO:0004735 (pyrroline-5-carboxylate reductase)                      |
| P55035 | GO:0004175 (endopeptidase)                                          |
| P55217 | GO:0003962 (cystathionine gamma-synthase)                           |
| P55233 |                                                                     |
| P55826 | GO:0004729 (protoporphyrinogen oxidase)                             |
| P56558 |                                                                     |
| P57681 | GO:0001735 (prenylcysteine oxidase)                                 |
| P59267 | GO:0016409 (palmitoyltransferase)                                   |
| P60662 | GO:0030898 (actin-dependent ATPase)                                 |
| P63319 | GO:0004697 (protein kinase C)                                       |
| P63331 | GO:0004722 (protein serine/threonine phosphatase)                   |
| P68032 | GO:0016887 (ATPase)                                                 |
| P69441 |                                                                     |
| P69834 | GO:0050518 (2-C-methyl-D-erythritol 4-phosphate cytidyltransferase) |
| P70054 | GO:0017108 (5'-flap endonuclease)                                   |
| P70470 | GO:0004622 (lysophospholipase)                                      |
| P70881 |                                                                     |
| P75044 |                                                                     |
| P75728 |                                                                     |
| P77044 |                                                                     |
| P77781 |                                                                     |
| P80385 | GO:0004679 (AMP-activated protein kinase)                           |
| P80386 | GO:0004679 (AMP-activated protein kinase)                           |
| P82474 |                                                                     |
| P83218 |                                                                     |
| P84029 | GO:0009055 (electron carrier)                                       |
| P87123 | GO:0003899 (DNA-directed RNA polymerase)                            |
| P90648 |                                                                     |
| P92949 | GO:0000293 (ferric-chelate reductase)                               |
| P92958 | GO:0004672 (protein kinase)                                         |
| P92983 | GO:0004657 (proline dehydrogenase)                                  |
| P92994 | GO:0016710 (trans-cinnamate 4-monooxygenase)                        |
| P93028 | GO:0004842 (ubiquitin-protein ligase)                               |
| P93031 | GO:0008446 (GDP-mannose 4,6-dehydratase)                            |
| P93422 |                                                                     |
| P93733 | GO:0004630 (phospholipase D)                                        |
| P93757 | GO:0004385 (guanylate kinase)                                       |
| P93805 |                                                                     |
| P93836 | GO:0003868 (4-hydroxyphenylpyruvate dioxygenase)                    |
| P93941 |                                                                     |
| P94072 | GO:0050162 (oxalate oxidase)                                        |
| P97346 | GO:0004791 (thioredoxin-disulfide reductase)                        |

|        |                                                                                                                                      |
|--------|--------------------------------------------------------------------------------------------------------------------------------------|
| P98183 |                                                                                                                                      |
| P99999 | GO:0045155 (electron transporter, transferring electrons from CoQH2-cytochrome c reductase complex and cytochrome c oxidase complex) |
| Q00218 | GO:0003849 (3-deoxy-7-phosphoheptulonate synthase)                                                                                   |
| Q00667 |                                                                                                                                      |
| Q01205 |                                                                                                                                      |
| Q01320 | GO:0003918 (DNA topoisomerase (ATP-hydrolyzing))                                                                                     |
| Q01519 | GO:0004129 (cytochrome-c oxidase)                                                                                                    |
| Q01939 | GO:0016887 (ATPase)                                                                                                                  |
| Q01963 |                                                                                                                                      |
| Q02061 | GO:0003899 (DNA-directed RNA polymerase)                                                                                             |
| Q02527 |                                                                                                                                      |
| Q02908 | GO:0004402 (histone acetyltransferase)                                                                                               |
| Q02979 | GO:0047389 (glycerophosphocholine phosphodiesterase)                                                                                 |
| Q03071 | GO:0004842 (ubiquitin-protein ligase)                                                                                                |
| Q03161 | GO:0047938 (glucose-6-phosphate 1-epimerase)                                                                                         |
| Q03529 | GO:0000170 (sphingosine hydroxylase)                                                                                                 |
| Q03532 | GO:0008186 (RNA-dependent ATPase)                                                                                                    |
| Q03920 | GO:0008757 (S-adenosylmethionine-dependent methyltransferase)                                                                        |
| Q04344 | GO:0033699 (DNA 5'-adenosine monophosphate hydrolase)                                                                                |
| Q04806 | GO:0004364 (glutathione transferase)                                                                                                 |
| Q05568 | GO:0004842 (ubiquitin-protein ligase)                                                                                                |
| Q05787 | GO:0004842 (ubiquitin-protein ligase)                                                                                                |
| Q05924 | GO:0042578 (phosphoric ester hydrolase)                                                                                              |
| Q05957 |                                                                                                                                      |
| Q06060 |                                                                                                                                      |
| Q06147 | GO:0017050 (D-erythro-sphingosine kinase)                                                                                            |
| Q06168 | GO:0008094 (DNA-dependent ATPase)                                                                                                    |
| Q06205 | GO:0003755 (peptidyl-prolyl cis-trans isomerase)                                                                                     |
| Q06504 | GO:0004596 (peptide alpha-N-acetyltransferase)                                                                                       |
| Q06548 | GO:0004674 (protein serine/threonine kinase)                                                                                         |
| Q06636 | GO:0051377 (mannose-ethanolamine phosphotransferase)                                                                                 |
| Q07488 |                                                                                                                                      |
| Q07540 | GO:0004322 (ferroxidase)                                                                                                             |
| Q07800 | GO:0004721 (phosphoprotein phosphatase)                                                                                              |
| Q07864 | GO:0003887 (DNA-directed DNA polymerase)                                                                                             |
| Q07923 | GO:0003955 (NAD(P)H dehydrogenase (quinone))                                                                                         |
| Q08162 | GO:0000175 (3'-5'-exoribonuclease)                                                                                                   |
| Q09028 | GO:0008094 (DNA-dependent ATPase)                                                                                                    |
| Q09131 | GO:0003993 (acid phosphatase)                                                                                                        |
| Q09154 | GO:0008121 (ubiquinol-cytochrome-c reductase)                                                                                        |
| Q09173 | GO:0004722 (protein serine/threonine phosphatase)                                                                                    |
| Q09177 | GO:0003899 (DNA-directed RNA polymerase)                                                                                             |
| Q09191 | GO:0003899 (DNA-directed RNA polymerase)                                                                                             |
| Q09923 | GO:0050235 (pyridoxal 4-dehydrogenase)                                                                                               |
| Q0WL81 | GO:0051731 (polynucleotide kinase)                                                                                                   |
| Q0WP28 | GO:0004656 (procollagen-proline 4-dioxygenase)                                                                                       |
| Q0WRJ7 | GO:0016491 (oxidoreductase)                                                                                                          |
| Q10361 | GO:0009055 (electron carrier)                                                                                                        |

|        |                                                                                               |
|--------|-----------------------------------------------------------------------------------------------|
| Q11136 | GO:0008233 (peptidase)                                                                        |
| Q12154 | GO:0016887 (ATPase)                                                                           |
| Q12311 | GO:0004406 (H3/H4 histone acetyltransferase)                                                  |
| Q12380 | GO:0019776 (Atg8 ligase)                                                                      |
| Q12385 | GO:0042171 (lysophosphatidic acid acyltransferase)                                            |
| Q12508 | GO:0004842 (ubiquitin-protein ligase)                                                         |
| Q12792 | GO:0004713 (protein tyrosine kinase)                                                          |
| Q12830 | GO:0008094 (DNA-dependent ATPase)                                                             |
| Q13216 | GO:0008094 (DNA-dependent ATPase)                                                             |
| Q13356 | GO:0004842 (ubiquitin-protein ligase)                                                         |
| Q13572 |                                                                                               |
| Q13615 | GO:0004725 (protein tyrosine phosphatase)                                                     |
| Q15005 |                                                                                               |
| Q15386 | GO:0004842 (ubiquitin-protein ligase)                                                         |
| Q15542 | GO:0004402 (histone acetyltransferase)                                                        |
| Q16134 |                                                                                               |
| Q16795 | GO:0003954 (NADH dehydrogenase)                                                               |
| Q16974 |                                                                                               |
| Q1ACB3 | GO:0010357 (homogentisate solanesyltransferase)                                               |
| Q1CSB4 |                                                                                               |
| Q1CTA7 |                                                                                               |
| Q1EC69 | GO:0000254 (C-4 methylsterol oxidase)                                                         |
| Q1EDG4 |                                                                                               |
| Q1H537 | GO:0051744 (3,8-divinyl protochlorophyllide a 8-vinyl reductase)                              |
| Q1KSC5 |                                                                                               |
| Q1PCS1 | GO:0016175 (superoxide-generating NADPH oxidase)                                              |
| Q1PID4 |                                                                                               |
| Q1WIQ6 | GO:0008886 (glyceraldehyde-3-phosphate dehydrogenase (NADP+))                                 |
| Q24208 | GO:0042054 (histone methyltransferase)                                                        |
| Q24368 | GO:0008094 (DNA-dependent ATPase)                                                             |
| Q28653 |                                                                                               |
| Q2TJA5 |                                                                                               |
| Q2YGU0 |                                                                                               |
| Q33DL3 |                                                                                               |
| Q38854 | GO:0008661 (1-deoxy-D-xylulose-5-phosphate synthase)                                          |
| Q38869 | GO:0004672 (protein kinase)                                                                   |
| Q38879 | GO:0016671 (oxidoreductase activity, acting on sulfur group of donors, disulfide as acceptor) |
| Q38912 | GO:0003924 (GTPase)                                                                           |
| Q38929 | GO:0004452 (isopentenyl-diphosphate delta-isomerase)                                          |
| Q38945 | GO:0008441 (3'(2'),5'-bisphosphate nucleotidase)                                              |
| Q38971 |                                                                                               |
| Q39023 |                                                                                               |
| Q39024 | GO:0004707 (MAP kinase)                                                                       |
| Q39055 | GO:0003824 (catalytic)                                                                        |
| Q39102 |                                                                                               |
| Q39152 | GO:0080019 (fatty acyl-CoA reductase (alcohol-forming))                                       |
| Q39227 | GO:0008757 (S-adenosylmethionine-dependent methyltransferase)                                 |

|        |                                                                                               |
|--------|-----------------------------------------------------------------------------------------------|
| Q39239 | GO:0016671 (oxidoreductase activity, acting on sulfur group of donors, disulfide as acceptor) |
| Q39241 | GO:0016671 (oxidoreductase activity, acting on sulfur group of donors, disulfide as acceptor) |
| Q39243 | GO:0004791 (thioredoxin-disulfide reductase)                                                  |
| Q39619 |                                                                                               |
| Q3E7T3 |                                                                                               |
| Q3E840 | GO:0009055 (electron carrier)                                                                 |
| Q3EBA7 | GO:0004839 (ubiquitin activating enzyme)                                                      |
| Q3EBG0 | GO:0004788 (thiamin diphosphokinase)                                                          |
| Q3EDK8 | GO:0009924 (octadecanal decarboxylase)                                                        |
| Q3LXA3 |                                                                                               |
| Q3SYZ6 |                                                                                               |
| Q3TDX8 | GO:0004128 (cytochrome-b5 reductase)                                                          |
| Q3TIR0 | GO:0008233 (peptidase)                                                                        |
| Q3TN04 | GO:0003899 (DNA-directed RNA polymerase)                                                      |
| Q3TWL1 | GO:0008233 (peptidase)                                                                        |
| Q3TY87 | GO:0004334 (fumarylacetoacetase)                                                              |
| Q3U462 | GO:0004568 (chitinase)                                                                        |
| Q3U7E0 | GO:0016887 (ATPase)                                                                           |
| Q3UDY1 | GO:0004032 (aldehyde reductase)                                                               |
| Q3UGH3 | GO:0004559 (alpha-mannosidase)                                                                |
| Q3V335 | GO:0004842 (ubiquitin-protein ligase)                                                         |
| Q40353 |                                                                                               |
| Q40412 |                                                                                               |
| Q40588 |                                                                                               |
| Q40673 |                                                                                               |
| Q40677 | GO:0004332 (fructose-bisphosphate aldolase)                                                   |
| Q41376 |                                                                                               |
| Q42472 | GO:0004351 (glutamate decarboxylase)                                                          |
| Q42521 | GO:0004351 (glutamate decarboxylase)                                                          |
| Q42524 | GO:0016207 (4-coumarate-CoA ligase)                                                           |
| Q42525 | GO:0008865 (fructokinase)                                                                     |
| Q42527 | GO:0004640 (phosphoribosylanthranilate isomerase)                                             |
| Q42529 | GO:0004834 (tryptophan synthase)                                                              |
| Q42533 | GO:0003989 (acetyl-CoA carboxylase)                                                           |
| Q42536 |                                                                                               |
| Q42541 | GO:0004842 (ubiquitin-protein ligase)                                                         |
| Q42546 | GO:0008441 (3'(2'),5'-bisphosphate nucleotidase)                                              |
| Q42551 | GO:0019789 (SUMO ligase)                                                                      |
| Q42553 | GO:0004452 (isopentenyl-diphosphate delta-isomerase)                                          |
| Q42563 | GO:0003999 (adenine phosphoribosyltransferase)                                                |
| Q42569 |                                                                                               |
| Q42606 | GO:0004851 (uroporphyrin-III C-methyltransferase)                                             |
| Q42880 |                                                                                               |
| Q42896 |                                                                                               |
| Q43077 |                                                                                               |
| Q43125 | GO:0004672 (protein kinase)                                                                   |
| Q43157 | GO:0004750 (ribulose-phosphate 3-epimerase)                                                   |

|        |                                                                       |
|--------|-----------------------------------------------------------------------|
| Q43295 | GO:0004020 (adenylylsulfate kinase)                                   |
| Q43314 | GO:0004353 (glutamate dehydrogenase [NAD(P)+])                        |
| Q43725 | GO:0004124 (cysteine synthase)                                        |
| Q43870 | GO:0004781 (sulfate adenylyltransferase (ATP))                        |
| Q45QT1 |                                                                       |
| Q46851 |                                                                       |
| Q4AE87 |                                                                       |
| Q4G176 | GO:0016878 (acid-thiol ligase)                                        |
| Q4G338 |                                                                       |
| Q4KML2 | GO:0003904 (deoxyribodipyrimidine photo-lyase)                        |
| Q4TU14 | GO:0004842 (ubiquitin-protein ligase)                                 |
| Q4VDN7 |                                                                       |
| Q504P4 | GO:0042623 (ATPase activity, coupled)                                 |
| Q52K88 | GO:0016787 (hydrolase)                                                |
| Q52T38 | GO:0016417 (S-acyltransferase)                                        |
| Q53E05 |                                                                       |
| Q545F0 | GO:0050178 (phenylpyruvate tautomerase)                               |
| Q545L9 | GO:0004719 (protein-L-isoaspartate (D-aspartate) O-methyltransferase) |
| Q564E2 | GO:0004459 (L-lactate dehydrogenase)                                  |
| Q564P2 |                                                                       |
| Q56WD9 | GO:0003988 (acetyl-CoA C-acyltransferase)                             |
| Q56WN1 | GO:0004356 (glutamate-ammonia ligase)                                 |
| Q56Y11 | GO:0045547 (dehydrodolichyl diphosphate synthase)                     |
| Q56YA5 | GO:0050281 (serine-glyoxylate transaminase)                           |
| Q56YN3 | GO:0042736 (NADH kinase)                                              |
| Q56YU0 | GO:0050269 (coniferyl-aldehyde dehydrogenase)                         |
| Q56ZN6 | GO:0009678 (hydrogen-translocating pyrophosphatase)                   |
| Q571L5 | GO:0042054 (histone methyltransferase)                                |
| Q596C5 |                                                                       |
| Q596W8 |                                                                       |
| Q596W9 |                                                                       |
| Q598P5 |                                                                       |
| Q59H18 | GO:0004672 (protein kinase)                                           |
| Q5CCT8 |                                                                       |
| Q5DKU8 |                                                                       |
| Q5I1Y5 | GO:0042623 (ATPase activity, coupled)                                 |
| Q5IBM5 | GO:0004842 (ubiquitin-protein ligase)                                 |
| Q5ICC1 |                                                                       |
| Q5KTR2 |                                                                       |
| Q5M731 | GO:0008972 (phosphomethylpyrimidine kinase)                           |
| Q5M969 | GO:0050124 (N-acylneuraminate-9-phosphatase)                          |
| Q5NUF4 |                                                                       |
| Q5SGD2 |                                                                       |
| Q5U3Z7 | GO:0008732 (L-allo-threonine aldolase)                                |
| Q5W7F1 | GO:0017040 (ceramidase)                                               |
| Q5XF85 | GO:0004842 (ubiquitin-protein ligase)                                 |
| Q5XIF3 | GO:0008137 (NADH dehydrogenase (ubiquinone))                          |
| Q5YDB6 | GO:0019204 (nucleotide phosphatase)                                   |
| Q5YFA2 |                                                                       |

|        |                                                                                   |
|--------|-----------------------------------------------------------------------------------|
| Q60720 | GO:0000293 (ferric-chelate reductase)                                             |
| Q61074 | GO:0004721 (phosphoprotein phosphatase)                                           |
| Q64620 | GO:0004722 (protein serine/threonine phosphatase)                                 |
| Q64654 | GO:0008398 (sterol 14-demethylase)                                                |
| Q65CJ7 |                                                                                   |
| Q66GP9 | GO:0004517 (nitric-oxide synthase)                                                |
| Q66GT5 | GO:0004439 (phosphatidylinositol-4,5-bisphosphate 5-phosphatase)                  |
| Q66Q58 |                                                                                   |
| Q67C39 |                                                                                   |
| Q67ZE1 | GO:0047012 (sterol-4-alpha-carboxylate 3-dehydrogenase (decarboxylating))         |
| Q680Q4 | GO:0019789 (SUMO ligase)                                                          |
| Q6DGG0 | GO:0003755 (peptidyl-prolyl cis-trans isomerase)                                  |
| Q6DNI8 |                                                                                   |
| Q6EMC1 |                                                                                   |
| Q6H9K0 | GO:0047911 (galacturan 1,4-alpha-galacturonidase)                                 |
| Q6IVK8 |                                                                                   |
| Q6IVV3 |                                                                                   |
| Q6L619 |                                                                                   |
| Q6L8K4 |                                                                                   |
| Q6NLQ6 | GO:0004698 (calcium-dependent protein kinase C)                                   |
| Q6PD26 | GO:0003923 (GPI-anchor transamidase)                                              |
| Q6PLH8 |                                                                                   |
| Q6PTT0 |                                                                                   |
| Q6Q0C0 | GO:0004842 (ubiquitin-protein ligase)                                             |
| Q6Q796 |                                                                                   |
| Q6RFY4 |                                                                                   |
| Q6SJP5 |                                                                                   |
| Q6T5D1 |                                                                                   |
| Q6TGX5 | GO:0004842 (ubiquitin-protein ligase)                                             |
| Q6TPH1 | GO:0003993 (acid phosphatase)                                                     |
| Q6U5H3 |                                                                                   |
| Q6VNB8 | GO:0003831 (beta-N-acetylglucosaminylglycopeptide beta-1,4-galactosyltransferase) |
| Q6WNR0 |                                                                                   |
| Q6XQN6 | GO:0004516 (nicotinate phosphoribosyltransferase)                                 |
| Q6XZ79 |                                                                                   |
| Q6Z744 |                                                                                   |
| Q6ZFH6 |                                                                                   |
| Q6ZY51 | GO:0051752 (phosphoglucan, water dikinase)                                        |
| Q70EK8 | GO:0004221 (ubiquitin thiolesterase)                                              |
| Q70G33 |                                                                                   |
| Q71DJ5 | GO:0047714 (galactolipase)                                                        |
| Q71SH3 |                                                                                   |
| Q724I0 | GO:0016887 (ATPase)                                                               |
| Q75PR2 |                                                                                   |
| Q75W54 |                                                                                   |
| Q764C1 |                                                                                   |
| Q76E52 |                                                                                   |

|        |                                                                                         |
|--------|-----------------------------------------------------------------------------------------|
| Q76FS5 | GO:0050347 (trans-octaprenyltranstransferase)                                           |
| Q78J03 | GO:0000318 (protein-methionine-R-oxide reductase)                                       |
| Q7KLV9 | GO:0004175 (endopeptidase)                                                              |
| Q7KMP8 | GO:0004175 (endopeptidase)                                                              |
| Q7KVA1 | GO:0030158 (protein xylosyltransferase)                                                 |
| Q7L1T6 | GO:0016653 (oxidoreductase activity, acting on NADH or NADPH, heme protein as acceptor) |
| Q7SXX1 | GO:0004372 (glycine hydroxymethyltransferase)                                           |
| Q7WTU5 |                                                                                         |
| Q7X9A9 |                                                                                         |
| Q7X9G0 |                                                                                         |
| Q7X9J0 |                                                                                         |
| Q7X9V3 | GO:0008080 (N-acetyltransferase)                                                        |
| Q7XA48 |                                                                                         |
| Q7XJ65 |                                                                                         |
| Q7XJE6 | GO:0004197 (cysteine-type endopeptidase)                                                |
| Q7XJR6 |                                                                                         |
| Q7XTK4 |                                                                                         |
| Q7XZQ7 |                                                                                         |
| Q7Y232 | GO:0035251 (UDP-glucosyltransferase)                                                    |
| Q7Z419 | GO:0004842 (ubiquitin-protein ligase)                                                   |
| Q7Z569 | GO:0004842 (ubiquitin-protein ligase)                                                   |
| Q804C3 | GO:0004738 (pyruvate dehydrogenase)                                                     |
| Q83066 |                                                                                         |
| Q840T2 |                                                                                         |
| Q84FG5 |                                                                                         |
| Q84JH7 | GO:0051266 (sirohydrochlorin ferrochelataze)                                            |
| Q84JN3 | GO:0003899 (DNA-directed RNA polymerase)                                                |
| Q84JU4 | GO:0033549 (MAP kinase phosphatase)                                                     |
| Q84LE3 |                                                                                         |
| Q84LH3 | GO:0008408 (3'-5' exonuclease)                                                          |
| Q84LM4 |                                                                                         |
| Q84MD8 | GO:0008531 (riboflavin kinase)                                                          |
| Q84P23 | GO:0004321 (fatty-acyl-CoA synthase)                                                    |
| Q84UH6 |                                                                                         |
| Q84V83 |                                                                                         |
| Q84VW9 | GO:0008964 (phosphoenolpyruvate carboxylase)                                            |
| Q84WL2 | GO:0047627 (adenylylsulfatase)                                                          |
| Q84WS0 | GO:0004252 (serine-type endopeptidase)                                                  |
| Q84XU2 | GO:0004721 (phosphoprotein phosphatase)                                                 |
| Q84Y95 | GO:0015038 (glutathione disulfide oxidoreductase)                                       |
| Q84ZT8 |                                                                                         |
| Q84ZW8 |                                                                                         |
| Q852S9 |                                                                                         |
| Q852T2 |                                                                                         |
| Q86RB1 |                                                                                         |
| Q86TM6 | GO:0016881 (acid-amino acid ligase)                                                     |
| Q86U44 | GO:0016422 (mRNA (2'-O-methyladenosine-N6-)-methyltransferase)                          |
| Q86VF5 |                                                                                         |



|        |                                                                                                                |
|--------|----------------------------------------------------------------------------------------------------------------|
| Q8BGM2 | GO:0004349 (glutamate 5-kinase)                                                                                |
| Q8BPT6 | GO:0008233 (peptidase)                                                                                         |
| Q8BTY5 | GO:0008233 (peptidase)                                                                                         |
| Q8CHB9 | GO:0003831 (beta-N-acetylglucosaminylglycopeptide beta-1,4-galactosyltransferase)                              |
| Q8GSJ1 | GO:0003879 (ATP phosphoribosyltransferase)                                                                     |
| Q8GTB6 |                                                                                                                |
| Q8GUQ8 | GO:0004854 (xanthine dehydrogenase)                                                                            |
| Q8GV29 |                                                                                                                |
| Q8GVD7 |                                                                                                                |
| Q8GVE8 | GO:0008964 (phosphoenolpyruvate carboxylase)                                                                   |
| Q8GW72 | GO:0004560 (alpha-L-fucosidase)                                                                                |
| Q8GWP5 | GO:0008835 (diaminohydroxyphosphoribosylaminopyrimidine deaminase)                                             |
| Q8GWT4 | GO:0008276 (protein methyltransferase)                                                                         |
| Q8GXU8 | GO:0003841 (1-acylglycerol-3-phosphate O-acyltransferase)                                                      |
| Q8GXX3 | GO:0016682 (oxidoreductase activity, acting on diphenols and related substances as donors, oxygen as acceptor) |
| Q8GY23 | GO:0004842 (ubiquitin-protein ligase)                                                                          |
| Q8GY31 | GO:0030611 (arsenate reductase)                                                                                |
| Q8GY89 | GO:0016667 (oxidoreductase activity, acting on sulfur group of donors)                                         |
| Q8GYW7 |                                                                                                                |
| Q8GZ86 |                                                                                                                |
| Q8GZQ4 | GO:0004521 (endoribonuclease)                                                                                  |
| Q8GZS9 |                                                                                                                |
| Q8H0F2 |                                                                                                                |
| Q8H0L8 |                                                                                                                |
| Q8H0P5 |                                                                                                                |
| Q8H0P6 |                                                                                                                |
| Q8H0W1 | GO:0008233 (peptidase)                                                                                         |
| Q8H136 | GO:0016887 (ATPase)                                                                                            |
| Q8H183 | GO:0003837 (beta-ureidopropionase)                                                                             |
| Q8H191 | GO:0046592 (polyamine oxidase)                                                                                 |
| Q8IR38 | GO:0004407 (histone deacetylase)                                                                               |
| Q8IRW8 | GO:0042800 (histone lysine N-methyltransferase activity (H3-K4 specific))                                      |
| Q8IUH5 | GO:0019706 (protein-cysteine S-palmitoleyltransferase)                                                         |
| Q8IV48 | GO:0008408 (3'-5' exonuclease)                                                                                 |
| Q8IVS2 | GO:0016740 (transferase)                                                                                       |
| Q8JHE0 | GO:0004672 (protein kinase)                                                                                    |
| Q8K3A2 | GO:0008665 (2'-phosphotransferase)                                                                             |
| Q8KDI7 |                                                                                                                |
| Q8KTI8 |                                                                                                                |
| Q8L3U4 | GO:0008967 (phosphoglycolate phosphatase)                                                                      |
| Q8L493 | GO:0008696 (4-amino-4-deoxychorismate lyase)                                                                   |
| Q8L4H0 | GO:0004672 (protein kinase)                                                                                    |
| Q8L5E1 |                                                                                                                |
| Q8L5Y9 | GO:0004594 (pantothenate kinase)                                                                               |
| Q8L633 | GO:0042781 (3'-tRNA processing endoribonuclease)                                                               |
| Q8L649 | GO:0004842 (ubiquitin-protein ligase)                                                                          |
| Q8L6Y1 | GO:0004843 (ubiquitin-specific protease)                                                                       |

|        |                                                                                               |
|--------|-----------------------------------------------------------------------------------------------|
| Q8L7F9 | GO:0010488 (UDP-galactose:N-glycan beta-1,3-galactosyltransferase)                            |
| Q8L7R2 | GO:0004413 (homoserine kinase)                                                                |
| Q8L9C4 | GO:0045703 (ketoreductase)                                                                    |
| Q8L9W3 | GO:0004842 (ubiquitin-protein ligase)                                                         |
| Q8LA53 | GO:0051747 (DNA demethylase)                                                                  |
| Q8LAS8 | GO:0018738 (S-formylglutathione hydrolase)                                                    |
| Q8LBA6 | GO:0003881 (CDP-diacylglycerol-inositol 3-phosphatidyltransferase)                            |
| Q8LCE1 | GO:0004356 (glutamate-ammonia ligase)                                                         |
| Q8LCT3 | GO:0016671 (oxidoreductase activity, acting on sulfur group of donors, disulfide as acceptor) |
| Q8LDP4 | GO:0003755 (peptidyl-prolyl cis-trans isomerase)                                              |
| Q8LDU4 | GO:0051743 (red chlorophyll catabolite reductase)                                             |
| Q8LFP9 | GO:0016860 (intramolecular oxidoreductase)                                                    |
| Q8LG50 | GO:0003841 (1-acylglycerol-3-phosphate O-acyltransferase)                                     |
| Q8LK04 |                                                                                               |
| Q8LK56 | GO:0019104 (DNA N-glycosylase)                                                                |
| Q8LKF6 |                                                                                               |
| Q8LKS7 |                                                                                               |
| Q8LSZ3 |                                                                                               |
| Q8MPM5 |                                                                                               |
| Q8MPP3 | GO:0004222 (metalloendopeptidase)                                                             |
| Q8QGQ2 | GO:0004028 (3-chloroallyl aldehyde dehydrogenase)                                             |
| Q8R0N9 | GO:0016409 (palmitoyltransferase)                                                             |
| Q8R431 | GO:0016787 (hydrolase)                                                                        |
| Q8R516 | GO:0004842 (ubiquitin-protein ligase)                                                         |
| Q8RU27 |                                                                                               |
| Q8RUX2 |                                                                                               |
| Q8RW99 |                                                                                               |
| Q8RWE2 | GO:0004805 (trehalose-phosphatase)                                                            |
| Q8RWE8 | GO:0010475 (galactose-1-phosphate guanylyltransferase (GDP))                                  |
| Q8RWF1 | GO:0030267 (glyoxylate reductase (NADP))                                                      |
| Q8RWM1 | GO:0004161 (dimethylallyltranstransferase)                                                    |
| Q8RWT5 | GO:0003937 (IMP cyclohydrolase)                                                               |
| Q8RWV4 | GO:0009974 (epsilon hydroxylase)                                                              |
| Q8RWW0 | GO:0016301 (kinase)                                                                           |
| Q8RWZ3 | GO:0003995 (acyl-CoA dehydrogenase)                                                           |
| Q8RX88 | GO:0004175 (endopeptidase)                                                                    |
| Q8RXD4 | GO:0004842 (ubiquitin-protein ligase)                                                         |
| Q8RXU4 | GO:0004793 (threonine aldolase)                                                               |
| Q8RXV3 | GO:0004722 (protein serine/threonine phosphatase)                                             |
| Q8RY79 |                                                                                               |
| Q8S4R4 |                                                                                               |
| Q8S5C1 |                                                                                               |
| Q8S5C2 |                                                                                               |
| Q8S8F9 | GO:0008936 (nicotinamidase)                                                                   |
| Q8S948 | GO:0050347 (trans-octaprenyltranstransferase)                                                 |
| Q8SYG2 | GO:0019781 (NEDD8 activating enzyme)                                                          |
| Q8T0N8 |                                                                                               |
| Q8TC12 |                                                                                               |

|        |                                                                                               |
|--------|-----------------------------------------------------------------------------------------------|
| Q8UWM8 |                                                                                               |
| Q8VDP3 | GO:0004497 (monooxygenase)                                                                    |
| Q8VWE9 |                                                                                               |
| Q8VWG7 | GO:0016671 (oxidoreductase activity, acting on sulfur group of donors, disulfide as acceptor) |
| Q8VWH7 |                                                                                               |
| Q8VWJ1 | GO:0010176 (homogentisate phytyltransferase)                                                  |
| Q8VWN6 |                                                                                               |
| Q8VYF5 | GO:0050126 (N-carbamoylputrescine amidase)                                                    |
| Q8VYI1 | GO:0000170 (sphingosine hydroxylase)                                                          |
| Q8VYI4 | GO:0004073 (aspartate-semialdehyde dehydrogenase)                                             |
| Q8VYJ1 | GO:0008756 (o-succinylbenzoate-CoA ligase)                                                    |
| Q8VYS2 |                                                                                               |
| Q8VYU3 |                                                                                               |
| Q8VZ17 | GO:0008168 (methyltransferase)                                                                |
| Q8VZB2 | GO:0004300 (enoyl-CoA hydratase)                                                              |
| Q8VZC3 | GO:0003842 (1-pyrroline-5-carboxylate dehydrogenase)                                          |
| Q8VZD4 | GO:0004175 (endopeptidase)                                                                    |
| Q8VZF1 | GO:0003987 (acetate-CoA ligase)                                                               |
| Q8VZH2 | GO:0004177 (aminopeptidase)                                                                   |
| Q8VZU3 | GO:0016752 (sinapoyltransferase)                                                              |
| Q8VZW3 |                                                                                               |
| Q8W1A0 |                                                                                               |
| Q8W1L6 | GO:0018812 (3-hydroxyacyl-CoA dehydratase)                                                    |
| Q8W1S1 | GO:0046481 (digalactosyldiacylglycerol synthase)                                              |
| Q8W1W9 |                                                                                               |
| Q8W2B8 | GO:0009001 (serine O-acetyltransferase)                                                       |
| Q8W2K4 |                                                                                               |
| Q8W468 | GO:0004842 (ubiquitin-protein ligase)                                                         |
| Q8W471 | GO:0008922 (long-chain-fatty-acid-[acyl-carrier-protein] ligase)                              |
| Q8W4C7 | GO:0019148 (D-cysteine desulhydrase)                                                          |
| Q8W4K6 | GO:0003924 (GTPase)                                                                           |
| Q8W4P1 | GO:0016301 (kinase)                                                                           |
| Q8W595 | GO:0018024 (histone-lysine N-methyltransferase)                                               |
| Q8W5A1 |                                                                                               |
| Q8W5S1 | GO:0004672 (protein kinase)                                                                   |
| Q8YC53 |                                                                                               |
| Q90YZ9 |                                                                                               |
| Q91W40 | GO:0008808 (cardiolipin synthase)                                                             |
| Q91WU6 | GO:0016409 (palmitoyltransferase)                                                             |
| Q91YM8 | GO:0004748 (ribonucleoside-diphosphate reductase)                                             |
| Q91YR1 | GO:0004713 (protein tyrosine kinase)                                                          |
| Q920R6 | GO:0008553 (hydrogen-exporting ATPase activity, phosphorylative mechanism)                    |
| Q921A4 | GO:0004601 (peroxidase)                                                                       |
| Q92355 | GO:0043141 (ATP-dependent 5'-3' DNA helicase)                                                 |
| Q92466 | GO:0004842 (ubiquitin-protein ligase)                                                         |
| Q924Z4 | GO:0050291 (sphingosine N-acyltransferase)                                                    |
| Q93009 | GO:0004843 (ubiquitin-specific protease)                                                      |

|        |                                                                           |
|--------|---------------------------------------------------------------------------|
| Q93KB8 |                                                                           |
| Q93V61 |                                                                           |
| Q93V78 |                                                                           |
| Q93VR3 | GO:0047918 (GDP-mannose 3,5-epimerase)                                    |
| Q93X45 |                                                                           |
| Q93X74 |                                                                           |
| Q93Y23 | GO:0004499 (flavin-containing monooxygenase)                              |
| Q93YN9 | GO:0035299 (inositol pentakisphosphate 2-kinase)                          |
| Q93YP7 | GO:0047293 (4-hydroxybenzoate nonaprenyltransferase)                      |
| Q93YW7 | GO:0008808 (cardiolipin synthase)                                         |
| Q93ZG7 | GO:0008186 (RNA-dependent ATPase)                                         |
| Q93ZK8 |                                                                           |
| Q93ZN9 | GO:0010285 (L,L-diaminopimelate aminotransferase)                         |
| Q93ZY3 |                                                                           |
| Q940D4 | GO:0004558 (alpha-glucosidase)                                            |
| Q940M2 | GO:0008453 (alanine-glyoxylate transaminase)                              |
| Q941L0 | GO:0016759 (cellulose synthase)                                           |
| Q948R1 | GO:0008970 (phospholipase A1)                                             |
| Q948S7 |                                                                           |
| Q949Q0 | GO:0004367 (glycerol-3-phosphate dehydrogenase (NAD+))                    |
| Q949X0 | GO:0009979 (16:0 monogalactosyldiacylglycerol desaturase)                 |
| Q949X7 | GO:0008836 (diaminopimelate decarboxylase)                                |
| Q949Y0 | GO:0004843 (ubiquitin-specific protease)                                  |
| Q94A41 | GO:0004556 (alpha-amylase)                                                |
| Q94A72 |                                                                           |
| Q94AA4 | GO:0003872 (6-phosphofructokinase)                                        |
| Q94AA9 | GO:0035252 (UDP-xylosyltransferase)                                       |
| Q94AG2 | GO:0004675 (transmembrane receptor protein serine/threonine kinase)       |
| Q94AS5 | GO:0010296 (prenylcysteine methylesterase)                                |
| Q94B07 |                                                                           |
| Q94B35 | GO:0051745 (4-hydroxy-3-methylbut-2-en-1-yl diphosphate reductase)        |
| Q94B74 | GO:0047631 (ADP-ribose diphosphatase)                                     |
| Q94BN2 | GO:0016768 (spermine synthase)                                            |
| Q94BT0 | GO:0046524 (sucrose-phosphate synthase)                                   |
| Q94F47 | GO:0004842 (ubiquitin-protein ligase)                                     |
| Q94FM7 |                                                                           |
| Q94FS6 |                                                                           |
| Q94IG7 | GO:0004729 (protoporphyrinogen oxidase)                                   |
| Q95AJ2 |                                                                           |
| Q95TI4 | GO:0004842 (ubiquitin-protein ligase)                                     |
| Q96266 | GO:0004364 (glutathione transferase)                                      |
| Q96329 | GO:0003997 (acyl-CoA oxidase)                                             |
| Q96330 | GO:0045431 (flavonol synthase)                                            |
| Q963A7 |                                                                           |
| Q96529 | GO:0004019 (adenylosuccinate synthase)                                    |
| Q96533 | GO:0080007 (S-nitrosoglutathione reductase)                               |
| Q96551 |                                                                           |
| Q96DB2 | GO:0004407 (histone deacetylase)                                          |
| Q96EQ9 | GO:0042800 (histone lysine N-methyltransferase activity (H3-K4 specific)) |

|        |                                                                               |
|--------|-------------------------------------------------------------------------------|
| Q96HE7 | GO:0016491 (oxidoreductase)                                                   |
| Q96LZ3 |                                                                               |
| Q96PM5 |                                                                               |
| Q96Q15 | GO:0004674 (protein serine/threonine kinase)                                  |
| Q96Q89 | GO:0016887 (ATPase)                                                           |
| Q99973 | GO:0003720 (telomerase)                                                       |
| Q99LX0 | GO:0051920 (peroxiredoxin)                                                    |
| Q99MD6 | GO:0004791 (thioredoxin-disulfide reductase)                                  |
| Q99MN9 |                                                                               |
| Q99NA5 | GO:0004449 (isocitrate dehydrogenase (NAD+))                                  |
| Q99P30 | GO:0003986 (acetyl-CoA hydrolase)                                             |
| Q9AR19 | GO:0010484 (H3 histone acetyltransferase)                                     |
| Q9AR73 |                                                                               |
| Q9AR92 |                                                                               |
| Q9ATG8 |                                                                               |
| Q9AV98 |                                                                               |
| Q9AVE7 | GO:0009540 (zeaxanthin epoxidase)                                             |
| Q9BRQ8 | GO:0004174 (electron-transferring-flavoprotein dehydrogenase)                 |
| Q9BT22 |                                                                               |
| Q9BTU6 | GO:0004430 (1-phosphatidylinositol 4-kinase)                                  |
| Q9BU89 | GO:0019135 (deoxyhypusine monooxygenase)                                      |
| Q9BUQ8 | GO:0008026 (ATP-dependent helicase)                                           |
| Q9BV10 |                                                                               |
| Q9BV57 | GO:0016491 (oxidoreductase)                                                   |
| Q9BVA0 | GO:0008568 (microtubule-severing ATPase)                                      |
| Q9BZC7 | GO:0016887 (ATPase)                                                           |
| Q9BZE4 | GO:0003924 (GTPase)                                                           |
| Q9C5I1 | GO:0047350 (glucuronate-1-phosphate uridylyltransferase)                      |
| Q9C5J7 | GO:0003872 (6-phosphofructokinase)                                            |
| Q9C5J9 | GO:0003924 (GTPase)                                                           |
| Q9C5L2 | GO:0004143 (diacylglycerol kinase)                                            |
| Q9C5Q8 | GO:0008173 (RNA methyltransferase)                                            |
| Q9C5R8 | GO:0051920 (peroxiredoxin)                                                    |
| Q9C5U1 | GO:0004673 (protein histidine kinase)                                         |
| Q9C5W3 | GO:0003951 (NAD+ kinase)                                                      |
| Q9C5Y0 | GO:0004630 (phospholipase D)                                                  |
| Q9C7G1 | GO:0004842 (ubiquitin-protein ligase)                                         |
| Q9C7R6 | GO:0004842 (ubiquitin-protein ligase)                                         |
| Q9C867 | GO:0016301 (kinase)                                                           |
| Q9C8G9 | GO:0008559 (xenobiotic-transporting ATPase)                                   |
| Q9C920 |                                                                               |
| Q9C9C0 | GO:0004252 (serine-type endopeptidase)                                        |
| Q9C9D0 |                                                                               |
| Q9C9G4 | GO:0043765 (T/G mismatch-specific endonuclease)                               |
| Q9C9Q8 | GO:0008168 (methyltransferase)                                                |
| Q9C9S4 | GO:0004805 (trehalose-phosphatase)                                            |
| Q9CA67 | GO:0045550 (geranylgeranyl reductase)                                         |
| Q9CAF5 | GO:0042626 (ATPase activity, coupled to transmembrane movement of substances) |

|        |                                                                         |
|--------|-------------------------------------------------------------------------|
| Q9CAQ2 | GO:0004406 (H3/H4 histone acetyltransferase)                            |
| Q9CAV6 | GO:0004672 (protein kinase)                                             |
| Q9CB01 | GO:0003924 (GTPase)                                                     |
| Q9CR50 |                                                                         |
| Q9CYR6 | GO:0004614 (phosphoglucomutase)                                         |
| Q9CZL5 | GO:0004505 (phenylalanine 4-monooxygenase)                              |
| Q9D074 | GO:0004842 (ubiquitin-protein ligase)                                   |
| Q9D892 | GO:0047429 (nucleoside-triphosphate diphosphatase)                      |
| Q9DB28 | GO:0004526 (ribonuclease P)                                             |
| Q9DGH5 | GO:0042083 (5,10-methylenetetrahydrofolate-dependent methyltransferase) |
| Q9EQY6 | GO:0000030 (mannosyltransferase)                                        |
| Q9EV64 |                                                                         |
| Q9FAF8 |                                                                         |
| Q9FEW9 |                                                                         |
| Q9FEY5 |                                                                         |
| Q9FEY7 |                                                                         |
| Q9FF66 | GO:0004842 (ubiquitin-protein ligase)                                   |
| Q9FFN7 | GO:0004143 (diacylglycerol kinase)                                      |
| Q9FG87 | GO:0009922 (fatty acid elongase)                                        |
| Q9FGC7 | GO:0009540 (zeaxanthin epoxidase)                                       |
| Q9FGX1 | GO:0003878 (ATP citrate synthase)                                       |
| Q9FH02 | GO:0016887 (ATPase)                                                     |
| Q9FHT5 | GO:0047196 (long-chain-alcohol O-fatty-acyltransferase)                 |
| Q9FHX5 | GO:0042973 (glucan endo-1,3-beta-D-glucosidase)                         |
| Q9FI56 | GO:0004176 (ATP-dependent peptidase)                                    |
| Q9FI61 | GO:0004842 (ubiquitin-protein ligase)                                   |
| Q9FI78 | GO:0047205 (quinic O-hydroxycinnamoyltransferase)                       |
| Q9FIE8 | GO:0048040 (UDP-glucuronate decarboxylase)                              |
| Q9FJ79 | GO:0003917 (DNA topoisomerase type I)                                   |
| Q9FJM5 | GO:0004049 (anthranilate synthase)                                      |
| Q9FJP6 | GO:0004842 (ubiquitin-protein ligase)                                   |
| Q9FK25 | GO:0047763 (caffeate O-methyltransferase)                               |
| Q9FK51 | GO:0017103 (UTP:galactose-1-phosphate uridylyltransferase)              |
| Q9FKG3 | GO:0003872 (6-phosphofructokinase)                                      |
| Q9FKS0 | GO:0004849 (uridine kinase)                                             |
| Q9FKW6 | GO:0003959 (NADPH dehydrogenase)                                        |
| Q9FLN0 | GO:0016298 (lipase)                                                     |
| Q9FLP9 | GO:0010475 (galactose-1-phosphate guanylyltransferase (GDP))            |
| Q9FLT2 | GO:0004428 (inositol or phosphatidylinositol kinase)                    |
| Q9FLW9 | GO:0004743 (pyruvate kinase)                                            |
| Q9FMJ0 | GO:0004430 (1-phosphatidylinositol 4-kinase)                            |
| Q9FMP3 |                                                                         |
| Q9FMW9 | GO:0010340 (carboxyl-O-methyltransferase)                               |
| Q9FMX7 | GO:0008936 (nicotinamidase)                                             |
| Q9FN05 | GO:0015926 (glucosidase)                                                |
| Q9FNA9 |                                                                         |
| Q9FNY7 | GO:0008534 (oxidized purine base lesion DNA N-glycosylase)              |
| Q9FPE3 | GO:0004392 (heme oxygenase (decyclizing))                               |

|        |                                                                               |
|--------|-------------------------------------------------------------------------------|
| Q9FPS9 | GO:0004843 (ubiquitin-specific protease)                                      |
| Q9FSD6 |                                                                               |
| Q9FSW1 |                                                                               |
| Q9FT83 |                                                                               |
| Q9FUB7 | GO:0016210 (naringenin-chalcone synthase)                                     |
| Q9FUC2 |                                                                               |
| Q9FUP0 | GO:0016629 (12-oxophytodienoate reductase)                                    |
| Q9FV53 | GO:0042586 (peptide deformylase)                                              |
| Q9FVQ6 | GO:0010283 (pinorexinol reductase)                                            |
| Q9FX32 | GO:0016157 (sucrose synthase)                                                 |
| Q9FX43 | GO:0004708 (MAP kinase kinase)                                                |
| Q9FY48 | GO:0004842 (ubiquitin-protein ligase)                                         |
| Q9FYB3 | GO:0004672 (protein kinase)                                                   |
| Q9FYC2 | GO:0032441 (pheophorbide a oxygenase)                                         |
| Q9FZ48 | GO:0004842 (ubiquitin-protein ligase)                                         |
| Q9GU36 |                                                                               |
| Q9H0N0 | GO:0003924 (GTPase)                                                           |
| Q9H611 | GO:0043141 (ATP-dependent 5'-3' DNA helicase)                                 |
| Q9HB23 | GO:0004824 (lysine-tRNA ligase)                                               |
| Q9HBH5 |                                                                               |
| Q9HCG7 | GO:0008422 (beta-glucosidase)                                                 |
| Q9JMF7 | GO:0047874 (dolichyldiphosphatase)                                            |
| Q9LAE5 |                                                                               |
| Q9LCZ4 |                                                                               |
| Q9LDA9 | GO:0031202 (RNA splicing factor activity, transesterification mechanism)      |
| Q9LDC0 | GO:0003755 (peptidyl-prolyl cis-trans isomerase)                              |
| Q9LDI3 | GO:0004672 (protein kinase)                                                   |
| Q9LDU6 | GO:0009918 (sterol delta7 reductase)                                          |
| Q9LE59 | GO:0047262 (polygalacturonate 4-alpha-galacturonosyltransferase)              |
| Q9LEH3 | GO:0004601 (peroxidase)                                                       |
| Q9LEJ0 |                                                                               |
| Q9LET6 | GO:0080019 (fatty acyl-CoA reductase (alcohol-forming))                       |
| Q9LEW8 | GO:0016301 (kinase)                                                           |
| Q9LFA2 | GO:0004672 (protein kinase)                                                   |
| Q9LFF9 | GO:0004427 (inorganic diphosphatase)                                          |
| Q9LFG2 | GO:0008837 (diaminopimelate epimerase)                                        |
| Q9LFR0 | GO:0004559 (alpha-mannosidase)                                                |
| Q9LFT8 | GO:0016301 (kinase)                                                           |
| Q9LIB2 | GO:0004645 (phosphorylase)                                                    |
| Q9LIK0 | GO:0004743 (pyruvate kinase)                                                  |
| Q9LIS3 |                                                                               |
| Q9LJB4 | GO:0050736 (O-malonyltransferase)                                             |
| Q9LJK1 |                                                                               |
| Q9LJL3 | GO:0004222 (metalloendopeptidase)                                             |
| Q9LK23 | GO:0004345 (glucose-6-phosphate dehydrogenase)                                |
| Q9LK64 | GO:0042626 (ATPase activity, coupled to transmembrane movement of substances) |
| Q9LKF8 |                                                                               |
| Q9LKJ1 | GO:0003860 (3-hydroxyisobutyryl-CoA hydrolase)                                |

|        |                                                                                                        |
|--------|--------------------------------------------------------------------------------------------------------|
| Q9LL84 | GO:0003910 (DNA ligase (ATP))                                                                          |
| Q9LMI0 | GO:0004805 (trehalose-phosphatase)                                                                     |
| Q9LMT2 |                                                                                                        |
| Q9LQ04 | GO:0008831 (dTDP-4-dehydrorhamnose reductase)                                                          |
| Q9LQF2 | GO:0004564 (beta-fructofuranosidase)                                                                   |
| Q9LR75 | GO:0004109 (coproporphyrinogen oxidase)                                                                |
| Q9LR78 | GO:0004722 (protein serine/threonine phosphatase)                                                      |
| Q9LRB0 | GO:0017050 (D-erythro-sphingosine kinase)                                                              |
| Q9LRC8 |                                                                                                        |
| Q9LRR9 | GO:0008891 (glycolate oxidase)                                                                         |
| Q9LS14 | GO:0004842 (ubiquitin-protein ligase)                                                                  |
| Q9LSP7 | GO:0004842 (ubiquitin-protein ligase)                                                                  |
| Q9LSQ5 | GO:0016655 (oxidoreductase activity, acting on NADH or NADPH, quinone or similar compound as acceptor) |
| Q9LSS7 | GO:0019784 (NEDD8-specific protease)                                                                   |
| Q9LSZ9 | GO:0004758 (serine C-palmitoyltransferase)                                                             |
| Q9LT02 | GO:0019829 (cation-transporting ATPase)                                                                |
| Q9LT10 | GO:0004091 (carboxylesterase)                                                                          |
| Q9LTR9 | GO:0019107 (myristoyltransferase)                                                                      |
| Q9LTX3 | GO:0004733 (pyridoxamine-phosphate oxidase)                                                            |
| Q9LU41 | GO:0005388 (calcium-transporting ATPase)                                                               |
| Q9LU86 | GO:0051920 (peroxiredoxin)                                                                             |
| Q9LUF3 | GO:0019948 (SUMO activating enzyme)                                                                    |
| Q9LUL7 | GO:0030599 (pectinesterase)                                                                            |
| Q9LV03 | GO:0016040 (glutamate synthase (NADH))                                                                 |
| Q9LVB8 | GO:0004091 (carboxylesterase)                                                                          |
| Q9LW56 | GO:0046577 (long-chain-alcohol oxidase)                                                                |
| Q9LX33 | GO:0008318 (protein prenyltransferase)                                                                 |
| Q9LX93 | GO:0004842 (ubiquitin-protein ligase)                                                                  |
| Q9LXC9 | GO:0004427 (inorganic diphosphatase)                                                                   |
| Q9LXE5 | GO:0003886 (DNA (cytosine-5-)-methyltransferase)                                                       |
| Q9LY74 | GO:0051741 (2-methyl-6-phytyl-1,4-benzoquinone methyltransferase)                                      |
| Q9LY87 | GO:0004842 (ubiquitin-protein ligase)                                                                  |
| Q9LZ66 | GO:0016002 (sulfite reductase)                                                                         |
| Q9LZ76 | GO:0010276 (phytol kinase)                                                                             |
| Q9LZJ3 | GO:0035252 (UDP-xylosyltransferase)                                                                    |
| Q9LZV4 | GO:0004672 (protein kinase)                                                                            |
| Q9M099 | GO:0004185 (serine-type carboxypeptidase)                                                              |
| Q9M0V0 |                                                                                                        |
| Q9M0X9 | GO:0004321 (fatty-acyl-CoA synthase)                                                                   |
| Q9M156 | GO:0035251 (UDP-glucosyltransferase)                                                                   |
| Q9M1W4 | GO:0008898 (homocysteine S-methyltransferase)                                                          |
| Q9M209 | GO:0000175 (3'-5'-exoribonuclease)                                                                     |
| Q9M2E2 | GO:0047504 ((-)-menthol dehydrogenase)                                                                 |
| Q9M2U2 | GO:0019166 (trans-2-enoyl-CoA reductase (NADPH))                                                       |
| Q9M3W5 |                                                                                                        |
| Q9M591 | GO:0048529 (magnesium-protoporphyrin IX monomethyl ester (oxidative) cyclase)                          |
| Q9M5J0 |                                                                                                        |



|        |                                                                           |
|--------|---------------------------------------------------------------------------|
| Q9M643 | GO:0047793 (cycloeucaleanol cycloisomerase)                               |
| Q9M7I7 | GO:0047746 (chlorophyllase)                                               |
| Q9M7L9 |                                                                           |
| Q9M7T0 | GO:0004601 (peroxidase)                                                   |
| Q9M8K7 | GO:0033549 (MAP kinase phosphatase)                                       |
| Q9M8L4 | GO:0004370 (glycerol kinase)                                              |
| Q9M8S8 | GO:0010347 (L-galactose-1-phosphate phosphatase)                          |
| Q9MA43 | GO:0042800 (histone lysine N-methyltransferase activity (H3-K4 specific)) |
| Q9MAT5 | GO:0035242 (protein-arginine omega-N asymmetric methyltransferase)        |
| Q9MB58 | GO:0004331 (fructose-2,6-bisphosphate 2-phosphatase)                      |
| Q9MBA1 | GO:0010277 (chlorophyllide a oxygenase)                                   |
| Q9N0A4 |                                                                           |
| Q9NB32 |                                                                           |
| Q9NDA2 |                                                                           |
| Q9NDA3 |                                                                           |
| Q9NHC6 |                                                                           |
| Q9NPC4 | GO:0008378 (galactosyltransferase)                                        |
| Q9NT62 | GO:0019787 (small conjugating protein ligase)                             |
| Q9NUT2 |                                                                           |
| Q9NY43 |                                                                           |
| Q9P289 | GO:0004672 (protein kinase)                                               |
| Q9P2X0 | GO:0004582 (dolichyl-phosphate beta-D-mannosyltransferase)                |
| Q9P9M8 |                                                                           |
| Q9QUL6 | GO:0016887 (ATPase)                                                       |
| Q9QYF1 |                                                                           |
| Q9RAE4 |                                                                           |
| Q9RAT0 |                                                                           |
| Q9RFL1 |                                                                           |
| Q9RFQ7 |                                                                           |
| Q9S3U5 |                                                                           |
| Q9S702 | GO:0004072 (aspartate kinase)                                             |
| Q9S762 | GO:0003879 (ATP phosphoribosyltransferase)                                |
| Q9S7B5 | GO:0004795 (threonine synthase)                                           |
| Q9S7D1 | GO:0046480 (galactolipid galactosyltransferase)                           |
| Q9S7E9 |                                                                           |
| Q9S7U9 | GO:0004708 (MAP kinase kinase)                                            |
| Q9S816 | GO:0004629 (phospholipase C)                                              |
| Q9S818 | GO:0045486 (naringenin 3-dioxygenase)                                     |
| Q9S850 | GO:0008482 (sulfite oxidase)                                              |
| Q9S9Q6 | GO:0004519 (endonuclease)                                                 |
| Q9SA18 | GO:0004412 (homoserine dehydrogenase)                                     |
| Q9SA77 | GO:0050373 (UDP-arabinose 4-epimerase)                                    |
| Q9SAA1 | GO:0045547 (dehydrodolichyl diphosphate synthase)                         |
| Q9SAK4 | GO:0004777 (succinate-semialdehyde dehydrogenase)                         |
| Q9SB57 |                                                                           |
| Q9SBA5 | GO:0004428 (inositol or phosphatidylinositol kinase)                      |
| Q9SBJ1 | GO:0009927 (histidine phosphotransfer kinase)                             |
| Q9SC14 |                                                                           |
| Q9SCY0 | GO:0004614 (phosphoglucomutase)                                           |

|        |                                                                              |
|--------|------------------------------------------------------------------------------|
| Q9SCZ4 | GO:0004672 (protein kinase)                                                  |
| Q9SD85 | GO:0016711 (flavonoid 3'-monooxygenase)                                      |
| Q9SDS7 | GO:0046961 (hydrogen ion transporting ATPase activity, rotational mechanism) |
| Q9SDY5 | GO:0019787 (small conjugating protein ligase)                                |
| Q9SEE5 | GO:0004335 (galactokinase)                                                   |
| Q9SEI3 | GO:0016887 (ATPase)                                                          |
| Q9SEI4 | GO:0016887 (ATPase)                                                          |
| Q9SEX2 |                                                                              |
| Q9SGD6 | GO:0047769 (arogenate dehydratase)                                           |
| Q9SGY2 | GO:0003878 (ATP citrate synthase)                                            |
| Q9SHH8 | GO:0004364 (glutathione transferase)                                         |
| Q9SHI7 | GO:0004842 (ubiquitin-protein ligase)                                        |
| Q9SI64 |                                                                              |
| Q9SJ44 | GO:0004842 (ubiquitin-protein ligase)                                        |
| Q9SJE2 | GO:0016297 (acyl-[acyl-carrier-protein] hydrolase)                           |
| Q9SJF3 | GO:0050072 (m7G(5')pppN diphosphatase)                                       |
| Q9SK82 |                                                                              |
| Q9SL05 | GO:0009055 (electron carrier)                                                |
| Q9SL42 | GO:0003755 (peptidyl-prolyl cis-trans isomerase)                             |
| Q9SL79 | GO:0031202 (RNA splicing factor activity, transesterification mechanism)     |
| Q9SLA8 | GO:0016631 (enoyl-[acyl-carrier-protein] reductase)                          |
| Q9SLC3 | GO:0004842 (ubiquitin-protein ligase)                                        |
| Q9SMB7 |                                                                              |
| Q9SMC1 |                                                                              |
| Q9SMG6 |                                                                              |
| Q9SMN0 | GO:0004091 (carboxylesterase)                                                |
| Q9SMW0 | GO:0016161 (beta-amylase)                                                    |
| Q9SN27 | GO:0004842 (ubiquitin-protein ligase)                                        |
| Q9SNC6 | GO:0004842 (ubiquitin-protein ligase)                                        |
| Q9SP05 |                                                                              |
| Q9SP20 |                                                                              |
| Q9SPD6 | GO:0004784 (superoxide dismutase)                                            |
| Q9SQI8 | GO:0004742 (dihydrolipoyllysine-residue acetyltransferase)                   |
| Q9SQJ1 |                                                                              |
| Q9SR43 | GO:0050619 (phytochromobilin:ferredoxin oxidoreductase)                      |
| Q9SR52 | GO:0009039 (urease)                                                          |
| Q9SR96 | GO:0016491 (oxidoreductase)                                                  |
| Q9SRQ7 | GO:0004629 (phospholipase C)                                                 |
| Q9SRS9 | GO:0004842 (ubiquitin-protein ligase)                                        |
| Q9SRW9 | GO:0047517 (1,4-beta-D-xylan synthase)                                       |
| Q9SS45 |                                                                              |
| Q9SSB5 | GO:0016887 (ATPase)                                                          |
| Q9SSE7 | GO:0047769 (arogenate dehydratase)                                           |
| Q9ST03 |                                                                              |
| Q9STG9 | GO:0004044 (amidophosphoribosyltransferase)                                  |
| Q9SU38 |                                                                              |
| Q9SU56 | GO:0016633 (galactonolactone dehydrogenase)                                  |
| Q9SUM3 | GO:0003958 (NADPH-hemoprotein reductase)                                     |

|        |                                                                                                    |
|--------|----------------------------------------------------------------------------------------------------|
| Q9SVC6 | GO:0004842 (ubiquitin-protein ligase)                                                              |
| Q9SW18 | GO:0046406 (magnesium protoporphyrin IX methyltransferase)                                         |
| Q9SWE5 | GO:0004633 (phosphopantothencysteine decarboxylase)                                                |
| Q9SXP7 | GO:0017118 (lipoyltransferase)                                                                     |
| Q9SY73 | GO:0016616 (oxidoreductase activity, acting on the CH-OH group of donors, NAD or NADP as acceptor) |
| Q9SYM7 |                                                                                                    |
| Q9SYQ8 |                                                                                                    |
| Q9SYT0 | GO:0004601 (peroxidase)                                                                            |
| Q9SZ30 | GO:0000107 (imidazoleglycerol-phosphate synthase)                                                  |
| Q9SZC9 |                                                                                                    |
| Q9SZZ8 | GO:0010291 (carotene beta-ring hydroxylase)                                                        |
| Q9TV77 |                                                                                                    |
| Q9U794 |                                                                                                    |
| Q9UBP6 | GO:0008176 (tRNA (guanine-N7-)-methyltransferase)                                                  |
| Q9UBQ7 | GO:0030267 (glyoxylate reductase (NADP))                                                           |
| Q9UGM6 |                                                                                                    |
| Q9UHB4 | GO:0016491 (oxidoreductase)                                                                        |
| Q9UHY7 | GO:0043874 (acireductone synthase)                                                                 |
| Q9UJ83 | GO:0016830 (carbon-carbon lyase)                                                                   |
| Q9UKM7 |                                                                                                    |
| Q9UMS4 | GO:0004842 (ubiquitin-protein ligase)                                                              |
| Q9US25 | GO:0008094 (DNA-dependent ATPase)                                                                  |
| Q9UT74 | GO:0004409 (homoaconitate hydratase)                                                               |
| Q9UTN3 | GO:0004652 (polynucleotide adenyltransferase)                                                      |
| Q9V345 | GO:0019781 (NEDD8 activating enzyme)                                                               |
| Q9V3P6 | GO:0004175 (endopeptidase)                                                                         |
| Q9V3Z4 | GO:0004175 (endopeptidase)                                                                         |
| Q9V429 | GO:0015036 (disulfide oxidoreductase)                                                              |
| Q9V436 | GO:0004175 (endopeptidase)                                                                         |
| Q9V6G5 | GO:0032577 (phosphatidylcholine:cardiolipin O-linoleoyltransferase)                                |
| Q9V9X8 | GO:0004686 (elongation factor-2 kinase)                                                            |
| Q9VCU9 | GO:0016443 (bidentate ribonuclease III)                                                            |
| Q9VCY3 | GO:0019781 (NEDD8 activating enzyme)                                                               |
| Q9VH19 | GO:0008233 (peptidase)                                                                             |
| Q9VHP0 | GO:0004004 (ATP-dependent RNA helicase)                                                            |
| Q9VMJ5 | GO:0004565 (beta-galactosidase)                                                                    |
| Q9VMQ9 |                                                                                                    |
| Q9VT65 | GO:0004198 (calcium-dependent cysteine-type endopeptidase)                                         |
| Q9VUX3 | GO:0019213 (deacetylase)                                                                           |
| Q9VUX9 | GO:0008233 (peptidase)                                                                             |
| Q9VVU5 | GO:0019781 (NEDD8 activating enzyme)                                                               |
| Q9VW54 | GO:0004175 (endopeptidase)                                                                         |
| Q9VZQ8 | GO:0004601 (peroxidase)                                                                            |
| Q9W1B0 | GO:0004674 (protein serine/threonine kinase)                                                       |
| Q9W5E1 | GO:0004842 (ubiquitin-protein ligase)                                                              |
| Q9X0Y1 |                                                                                                    |
| Q9XES5 |                                                                                                    |
| Q9XFS9 | GO:0030604 (1-deoxy-D-xylulose-5-phosphate reductoisomerase)                                       |

|        |                                                                               |
|--------|-------------------------------------------------------------------------------|
| Q9XGN4 |                                                                               |
| Q9XHE8 |                                                                               |
| Q9XI46 | GO:0016491 (oxidoreductase)                                                   |
| Q9XI60 | GO:0008195 (phosphatidate phosphatase)                                        |
| Q9XIA9 | GO:0004467 (long-chain-fatty-acid-CoA ligase)                                 |
| Q9XIL5 | GO:0031202 (RNA splicing factor activity, transesterification mechanism)      |
| Q9XZG5 |                                                                               |
| Q9Y230 | GO:0016887 (ATPase)                                                           |
| Q9Y259 |                                                                               |
| Q9Y265 | GO:0016887 (ATPase)                                                           |
| Q9Y285 |                                                                               |
| Q9Y535 | GO:0003899 (DNA-directed RNA polymerase)                                      |
| Q9Y7R4 | GO:0018024 (histone-lysine N-methyltransferase)                               |
| Q9Z172 | GO:0019789 (SUMO ligase)                                                      |
| Q9ZNV9 | GO:0009927 (histidine phosphotransfer kinase)                                 |
| Q9ZP06 | GO:0016615 (malate dehydrogenase)                                             |
| Q9ZPN0 |                                                                               |
| Q9ZPQ3 | GO:0051499 (D-aminoacyl-tRNA deacylase)                                       |
| Q9ZPV8 | GO:0004595 (pantetheine-phosphate adenylyltransferase)                        |
| Q9ZQ31 | GO:0004713 (protein tyrosine kinase)                                          |
| Q9ZQ95 | GO:0035251 (UDP-glucosyltransferase)                                          |
| Q9ZQC6 | GO:0042285 (xylosyltransferase)                                               |
| Q9ZS21 |                                                                               |
| Q9ZS97 | GO:0042626 (ATPase activity, coupled to transmembrane movement of substances) |
| Q9ZSP7 |                                                                               |
| Q9ZSS6 | GO:0004794 (L-threonine ammonia-lyase)                                        |
| Q9ZT48 | GO:0004057 (arginyltransferase)                                               |
| Q9ZTP4 |                                                                               |
| Q9ZTS1 |                                                                               |
| Q9ZUU1 | GO:0004017 (adenylate kinase)                                                 |
| Q9ZUX1 | GO:0008393 (fatty acid (omega-1)-hydroxylase)                                 |
| Q9ZUY3 | GO:0047769 (arogenate dehydratase)                                            |
| Q9ZVI9 | GO:0004306 (ethanolamine-phosphate cytidylyltransferase)                      |
| Q9ZWQ9 |                                                                               |
| Q9ZWT1 | GO:0017140 (lipoic acid synthase)                                             |
