# Supplementary material for: Identifying core features of adaptive metabolic mechanisms for chronic heat stress attenuation contributing to systems robustness
Source: Royal Society of Chemistry journal article supplement (doi:10.1039/c2ib00109h), 2012-01-01
Supplement: c2ib00109h_4.pdf [file c2ib00109h_4.pdf]

| Heat Stress Responsive <i>Zostera noltii</i> Genes, Northern Population ( $\alpha=0.01$ ) |                                                           |
|-------------------------------------------------------------------------------------------|-----------------------------------------------------------|
| METACYC ID                                                                                | Description                                               |
| A0AR23                                                                                    | GO:0004842 (ubiquitin-protein ligase)                     |
| A1XQQ5                                                                                    |                                                           |
| A1ZA72                                                                                    | GO:0004687 (myosin light chain kinase)                    |
| A2A7F7                                                                                    | GO:0004489 (methylenetetrahydrofolate reductase (NADPH))  |
| A2AGL8                                                                                    | GO:0004842 (ubiquitin-protein ligase)                     |
| A5N5C7                                                                                    |                                                           |
| A5WUL6                                                                                    | GO:0004129 (cytochrome-c oxidase)                         |
| A9LDD9                                                                                    | GO:0004372 (glycine hydroxymethyltransferase)             |
| B1ANK7                                                                                    |                                                           |
| B2R5V5                                                                                    |                                                           |
| B3DGQ0                                                                                    | GO:0004842 (ubiquitin-protein ligase)                     |
| B4K9W3                                                                                    |                                                           |
| O00217                                                                                    | GO:0008137 (NADH dehydrogenase (ubiquinone))              |
| O00391                                                                                    | GO:0016971 (flavin-linked sulfhydryl oxidase)             |
| O04130                                                                                    | GO:0004617 (phosphoglycerate dehydrogenase)               |
| O04147                                                                                    | GO:0004112 (cyclic-nucleotide phosphodiesterase)          |
| O04277                                                                                    |                                                           |
| O04373                                                                                    | GO:0010179 (IAA-Ala conjugate hydrolase)                  |
| O04379                                                                                    | GO:0004521 (endoribonuclease)                             |
| O04847                                                                                    |                                                           |
| O04885                                                                                    |                                                           |
| O04896                                                                                    |                                                           |
| O04897                                                                                    |                                                           |
| O04905                                                                                    | GO:0009041 (uridylate kinase)                             |
| O04928                                                                                    | GO:0004605 (phosphatidate cytidyltransferase)             |
| O04983                                                                                    | GO:0003989 (acetyl-CoA carboxylase)                       |
| O08560                                                                                    | GO:0004143 (diacylglycerol kinase)                        |
| O08841                                                                                    |                                                           |
| O13696                                                                                    | GO:0004449 (isocitrate dehydrogenase (NAD <sup>+</sup> )) |
| O13792                                                                                    | GO:0004004 (ATP-dependent RNA helicase)                   |
| O13811                                                                                    | GO:0015035 (protein disulfide oxidoreductase)             |
| O13849                                                                                    | GO:0004185 (serine-type carboxypeptidase)                 |
| O13877                                                                                    | GO:0003899 (DNA-directed RNA polymerase)                  |
| O14295                                                                                    | GO:0050236 (pyridoxine 4-dehydrogenase)                   |
| O14459                                                                                    | GO:0003899 (DNA-directed RNA polymerase)                  |
| O15067                                                                                    | GO:0004642 (phosphoribosylformylglycinamide synthase)     |
| O16299                                                                                    | GO:0016787 (hydrolase)                                    |
| O18767                                                                                    |                                                           |
| O20250                                                                                    | GO:0004802 (transketolase)                                |
| O22141                                                                                    |                                                           |
| O22190                                                                                    | GO:0010279 (indole-3-acetic acid amido synthetase)        |
| O22203                                                                                    | GO:0046409 (p-coumarate 3-hydroxylase)                    |
| O22207                                                                                    | GO:0004843 (ubiquitin-specific protease)                  |
| O22213                                                                                    | GO:0019139 (cytokinin dehydrogenase)                      |
| O22229                                                                                    | GO:0004791 (thioredoxin-disulfide reductase)              |
| O22287                                                                                    | GO:0004475 (mannose-1-phosphate guanylyltransferase)      |
| O22476                                                                                    | GO:0004674 (protein serine/threonine kinase)              |

|        |                                                                                               |
|--------|-----------------------------------------------------------------------------------------------|
| O22609 | GO:0008236 (serine-type peptidase)                                                            |
| O22932 | GO:0004672 (protein kinase)                                                                   |
| O23044 | GO:0004601 (peroxidase)                                                                       |
| O23066 | GO:0008393 (fatty acid (omega-1)-hydroxylase)                                                 |
| O23141 | GO:0008792 (arginine decarboxylase)                                                           |
| O23166 | GO:0016671 (oxidoreductase activity, acting on sulfur group of donors, disulfide as acceptor) |
| O23206 | GO:0004177 (aminopeptidase)                                                                   |
| O23234 | GO:0008757 (S-adenosylmethionine-dependent methyltransferase)                                 |
| O23255 | GO:0004013 (adenosylhomocysteinase)                                                           |
| O23299 | GO:0004165 (dodecenoyl-CoA delta-isomerase)                                                   |
| O23461 | GO:0009702 (L-arabinokinase)                                                                  |
| O23512 | GO:0016788 (hydrolase activity, acting on ester bonds)                                        |
| O23627 |                                                                                               |
| O23680 | GO:0003924 (GTPase)                                                                           |
| O23722 | GO:0004163 (diphosphomevalonate decarboxylase)                                                |
| O23761 |                                                                                               |
| O24035 |                                                                                               |
| O24325 |                                                                                               |
| O24435 | GO:0004672 (protein kinase)                                                                   |
| O24454 | GO:0004843 (ubiquitin-specific protease)                                                      |
| O24496 | GO:0004416 (hydroxyacylglutathione hydrolase)                                                 |
| O24529 |                                                                                               |
| O24621 | GO:0003899 (DNA-directed RNA polymerase)                                                      |
| O30561 |                                                                                               |
| O30612 |                                                                                               |
| O32028 |                                                                                               |
| O34125 |                                                                                               |
| O35730 | GO:0004842 (ubiquitin-protein ligase)                                                         |
| O35940 |                                                                                               |
| O48723 | GO:0016298 (lipase)                                                                           |
| O48958 |                                                                                               |
| O48962 | GO:0000247 (C-8 sterol isomerase)                                                             |
| O49081 |                                                                                               |
| O49196 | GO:0004020 (adenylylsulfate kinase)                                                           |
| O49213 | GO:0050577 (GDP-L-fucose synthase)                                                            |
| O49218 |                                                                                               |
| O49432 | GO:0004650 (polygalacturonase)                                                                |
| O49434 | GO:0047652 (allantoate deiminase)                                                             |
| O49499 | GO:0042409 (caffeoyl-CoA O-methyltransferase)                                                 |
| O49543 | GO:0031071 (cysteine desulfurase)                                                             |
| O49562 | GO:0004721 (phosphoprotein phosphatase)                                                       |
| O49857 |                                                                                               |
| O50008 | GO:0008705 (methionine synthase)                                                              |
| O54199 |                                                                                               |
| O55055 |                                                                                               |
| O55234 | GO:0008233 (peptidase)                                                                        |
| O58651 |                                                                                               |
| O58762 |                                                                                               |

|        |                                                                                                                                                                                         |
|--------|-----------------------------------------------------------------------------------------------------------------------------------------------------------------------------------------|
| O59413 |                                                                                                                                                                                         |
|        | GO:0046961 (hydrogen ion transporting ATPase activity, rotational mechanism)                                                                                                            |
| O59941 |                                                                                                                                                                                         |
| O60078 | GO:0004665 (prephenate dehydrogenase (NADP+))                                                                                                                                           |
| O60260 | GO:0004842 (ubiquitin-protein ligase)                                                                                                                                                   |
| O60762 | GO:0004582 (dolichyl-phosphate beta-D-mannosyltransferase)                                                                                                                              |
| O60832 | GO:0003720 (telomerase)                                                                                                                                                                 |
| O60869 | GO:0008168 (methyltransferase)                                                                                                                                                          |
| O64425 | GO:0004842 (ubiquitin-protein ligase)                                                                                                                                                   |
| O64437 |                                                                                                                                                                                         |
| O64470 | GO:0016410 (N-acyltransferase)                                                                                                                                                          |
| O64517 | GO:0008234 (cysteine-type peptidase)                                                                                                                                                    |
| O64530 | GO:0016784 (3-mercaptopyruvate sulfurtransferase)                                                                                                                                       |
|        | GO:0016671 (oxidoreductase activity, acting on sulfur group of donors, disulfide as acceptor)                                                                                           |
| O64654 |                                                                                                                                                                                         |
| O64763 | GO:0004842 (ubiquitin-protein ligase)                                                                                                                                                   |
| O64867 | GO:0004842 (ubiquitin-protein ligase)                                                                                                                                                   |
| O64883 | GO:0019137 (thioglucosidase)                                                                                                                                                            |
| O64903 | GO:0004550 (nucleoside diphosphate kinase)                                                                                                                                              |
| O64925 |                                                                                                                                                                                         |
| O65041 | GO:0019781 (NEDD8 activating enzyme)                                                                                                                                                    |
| O65351 | GO:0004252 (serine-type endopeptidase)                                                                                                                                                  |
| O65572 | GO:0045549 (9-cis-epoxycarotenoid dioxygenase)                                                                                                                                          |
|        | GO:0016709 (oxidoreductase activity, acting on paired donors, with incorporation or reduction of molecular oxygen, NADH or NADPH as one donor, and incorporation of one atom of oxygen) |
| O65782 |                                                                                                                                                                                         |
| O65876 |                                                                                                                                                                                         |
| O65896 | GO:0004126 (cytidine deaminase)                                                                                                                                                         |
| O67577 |                                                                                                                                                                                         |
| O70196 | GO:0004175 (endopeptidase)                                                                                                                                                              |
| O73884 |                                                                                                                                                                                         |
| O74475 | GO:0003843 (1,3-beta-glucan synthase)                                                                                                                                                   |
| O74635 | GO:0003899 (DNA-directed RNA polymerase)                                                                                                                                                |
| O74850 | GO:0004144 (diacylglycerol O-acyltransferase)                                                                                                                                           |
| O74856 | GO:0000175 (3'-5'-exoribonuclease)                                                                                                                                                      |
| O74880 | GO:0004482 (mRNA (guanine-N7-)-methyltransferase)                                                                                                                                       |
| O75251 | GO:0003954 (NADH dehydrogenase)                                                                                                                                                         |
| O75643 | GO:0008026 (ATP-dependent helicase)                                                                                                                                                     |
| O75947 | GO:0016887 (ATPase)                                                                                                                                                                     |
| O76463 | GO:0047710 (bis(5'-adenosyl)-triphosphatase)                                                                                                                                            |
| O80013 |                                                                                                                                                                                         |
| O80345 | GO:0019912 (cyclin-dependent protein kinase activating kinase)                                                                                                                          |
| O80396 | GO:0004708 (MAP kinase kinase)                                                                                                                                                          |
| O80397 | GO:0004708 (MAP kinase kinase)                                                                                                                                                          |
| O80433 |                                                                                                                                                                                         |
| O80437 | GO:0003841 (1-acylglycerol-3-phosphate O-acyltransferase)                                                                                                                               |
| O80452 | GO:0003876 (AMP deaminase)                                                                                                                                                              |
| O80477 | GO:0016788 (hydrolase activity, acting on ester bonds)                                                                                                                                  |
| O80574 | GO:0008839 (dihydrodipicolinate reductase)                                                                                                                                              |

|        |                                                                                                                |
|--------|----------------------------------------------------------------------------------------------------------------|
| O80575 | GO:0000906 (6,7-dimethyl-8-ribityllumazine synthase)                                                           |
| O80725 | GO:0008559 (xenobiotic-transporting ATPase)                                                                    |
| O80840 | GO:0004615 (phosphomannomutase)                                                                                |
| O80852 | GO:0004602 (glutathione peroxidase)                                                                            |
| O80860 |                                                                                                                |
| O80871 | GO:0004722 (protein serine/threonine phosphatase)                                                              |
| O81108 | GO:0005388 (calcium-transporting ATPase)                                                                       |
| O81210 | GO:0016174 (NAD(P)H oxidase)                                                                                   |
| O81235 | GO:0004784 (superoxide dismutase)                                                                              |
| O81413 |                                                                                                                |
| O81635 | GO:0016887 (ATPase)                                                                                            |
| O81646 |                                                                                                                |
| O81770 | GO:0046509 (1,2-diacylglycerol 3-beta-galactosyltransferase)                                                   |
| O81852 | GO:0004412 (homoserine dehydrogenase)                                                                          |
| O81884 | GO:0010349 (L-galactose dehydrogenase)                                                                         |
| O82030 |                                                                                                                |
| O82110 |                                                                                                                |
| O82162 | GO:0030946 (protein tyrosine phosphatase activity, metal-dependent)                                            |
| O82175 | GO:0042054 (histone methyltransferase)                                                                         |
| O82239 | GO:0004842 (ubiquitin-protein ligase)                                                                          |
| O82413 |                                                                                                                |
| O82462 |                                                                                                                |
| O82567 |                                                                                                                |
| O82730 | GO:0046509 (1,2-diacylglycerol 3-beta-galactosyltransferase)                                                   |
| O82782 | GO:0003949 (1-(5-phosphoribosyl)-5-[(5-phosphoribosylamino)methylideneamino]imidazole-4-carboxamide isomerase) |
| O82796 | GO:0004647 (phosphoserine phosphatase)                                                                         |
| O88484 | GO:0004741 ([pyruvate dehydrogenase (lipoamide)] phosphatase)                                                  |
| O88766 | GO:0008237 (metallopeptidase)                                                                                  |
| O89106 | GO:0047710 (bis(5'-adenosyl)-triphosphatase)                                                                   |
| O94703 | GO:0003899 (DNA-directed RNA polymerase)                                                                       |
| O94911 | GO:0042626 (ATPase activity, coupled to transmembrane movement of substances)                                  |
| O95271 | GO:0003950 (NAD+ ADP-ribosyltransferase)                                                                       |
| O95363 | GO:0004826 (phenylalanine-tRNA ligase)                                                                         |
| O95391 | GO:0000386 (second spliceosomal transesterification)                                                           |
| O96787 |                                                                                                                |
| O96788 |                                                                                                                |
| O96989 | GO:0043138 (3'-5' DNA helicase)                                                                                |
| O97159 | GO:0016887 (ATPase)                                                                                            |
| P00128 | GO:0008121 (ubiquinol-cytochrome-c reductase)                                                                  |
| P00401 | GO:0004129 (cytochrome-c oxidase)                                                                              |
| P00560 | GO:0004618 (phosphoglycerate kinase)                                                                           |
| P00582 |                                                                                                                |
| P00784 |                                                                                                                |
| P00830 | GO:0046961 (hydrogen ion transporting ATPase activity, rotational mechanism)                                   |
| P00846 | GO:0016887 (ATPase)                                                                                            |

|        |                                                                                                       |
|--------|-------------------------------------------------------------------------------------------------------|
| P00854 | GO:0016887 (ATPase)                                                                                   |
| P00899 | GO:0004049 (anthranilate synthase)                                                                    |
| P00950 | GO:0004619 (phosphoglycerate mutase)                                                                  |
| P00956 |                                                                                                       |
| P00962 |                                                                                                       |
| P02829 | GO:0042623 (ATPase activity, coupled)                                                                 |
| P02992 | GO:0003924 (GTPase)                                                                                   |
| P04785 | GO:0003756 (protein disulfide isomerase)                                                              |
| P04801 | GO:0004829 (threonine-tRNA ligase)                                                                    |
| P04802 | GO:0004815 (aspartate-tRNA ligase)                                                                    |
| P04805 |                                                                                                       |
| P04825 |                                                                                                       |
| P05116 |                                                                                                       |
| P05130 | GO:0004674 (protein serine/threonine kinase)                                                          |
| P05149 |                                                                                                       |
| P05314 |                                                                                                       |
| P05466 | GO:0003866 (3-phosphoshikimate 1-carboxyvinyltransferase)                                             |
| P05772 |                                                                                                       |
| P05895 |                                                                                                       |
| P06576 | GO:0046961 (hydrogen ion transporting ATPase activity, rotational mechanism)                          |
| P06634 | GO:0003724 (RNA helicase)                                                                             |
| P07143 | GO:0045153 (electron transporter, transferring electrons within CoQH2-cytochrome c reductase complex) |
| P07154 | GO:0004177 (aminopeptidase)                                                                           |
| P07237 | GO:0004656 (procollagen-proline 4-dioxygenase)                                                        |
| P07251 | GO:0016887 (ATPase)                                                                                   |
| P07284 | GO:0004828 (serine-tRNA ligase)                                                                       |
| P07639 |                                                                                                       |
| P07813 |                                                                                                       |
| P07834 | GO:0004842 (ubiquitin-protein ligase)                                                                 |
| P07991 |                                                                                                       |
| P08179 |                                                                                                       |
| P08461 | GO:0004742 (dihydrolipoyllysine-residue acetyltransferase)                                            |
| P08678 | GO:0004016 (adenylate cyclase)                                                                        |
| P08879 | GO:0016301 (kinase)                                                                                   |
| P09034 | GO:0004055 (argininosuccinate synthase)                                                               |
| P09436 | GO:0004822 (isoleucine-tRNA ligase)                                                                   |
| P09440 | GO:0004488 (methylenetetrahydrofolate dehydrogenase (NADP+))                                          |
| P09668 | GO:0004197 (cysteine-type endopeptidase)                                                              |
| P0A3C9 | GO:0009055 (electron carrier)                                                                         |
| P0A6A0 |                                                                                                       |
| P0A6K3 |                                                                                                       |
| P0A717 |                                                                                                       |
| P0A840 |                                                                                                       |
| P0A850 |                                                                                                       |
| P0A887 |                                                                                                       |
| P0A8F4 |                                                                                                       |
| P0A8Y1 |                                                                                                       |

|        |                                                                          |
|--------|--------------------------------------------------------------------------|
| P0A8Y5 |                                                                          |
| P0A9L5 |                                                                          |
| P0A9P9 |                                                                          |
| P0AB65 |                                                                          |
| P0AB89 |                                                                          |
| P0ABQ2 |                                                                          |
| P0ABU0 |                                                                          |
| P0ACC1 |                                                                          |
| P0ADF6 |                                                                          |
| P0AE18 |                                                                          |
| P0AEH1 |                                                                          |
| P0AG20 |                                                                          |
| POC028 | GO:0008486 (diphosphoinositol-polyphosphate diphosphatase)               |
| P10081 | GO:0004004 (ATP-dependent RNA helicase)                                  |
| P10363 | GO:0003896 (DNA primase)                                                 |
| P10591 | GO:0016887 (ATPase)                                                      |
| P10742 |                                                                          |
| P10902 |                                                                          |
| P10963 | GO:0004612 (phosphoenolpyruvate carboxykinase (ATP))                     |
| P11017 | GO:0003924 (GTPase)                                                      |
| P11446 |                                                                          |
| P11620 | GO:0003924 (GTPase)                                                      |
| P12210 |                                                                          |
| P12340 |                                                                          |
| P12398 | GO:0016887 (ATPase)                                                      |
| P12412 |                                                                          |
| P12694 | GO:0003826 (alpha-ketoacid dehydrogenase)                                |
| P12883 | GO:0030898 (actin-dependent ATPase)                                      |
| P12904 | GO:0004679 (AMP-activated protein kinase)                                |
| P13001 |                                                                          |
| P13114 | GO:0016210 (naringenin-chalcone synthase)                                |
| P13280 |                                                                          |
| P13444 | GO:0004478 (methionine adenosyltransferase)                              |
| P13678 |                                                                          |
| P13697 | GO:0004473 (malate dehydrogenase (oxaloacetate-decarboxylating) (NADP+)) |
| P14133 |                                                                          |
| P14314 |                                                                          |
| P14540 | GO:0004332 (fructose-bisphosphate aldolase)                              |
| P14654 |                                                                          |
| P14656 |                                                                          |
| P14671 | GO:0004834 (tryptophan synthase)                                         |
| P14832 | GO:0003755 (peptidyl-prolyl cis-trans isomerase)                         |
| P15280 |                                                                          |
| P15347 |                                                                          |
| P15367 | GO:0008233 (peptidase)                                                   |
| P15374 |                                                                          |
| P15424 | GO:0008186 (RNA-dependent ATPase)                                        |
| P15565 | GO:0004809 (tRNA (guanine-N2-)-methyltransferase)                        |

|        |                                                                              |
|--------|------------------------------------------------------------------------------|
| P15646 | GO:0008168 (methyltransferase)                                               |
| P15719 |                                                                              |
| P15873 | GO:0030337 (DNA polymerase processivity factor)                              |
| P16016 |                                                                              |
| P16127 | GO:0016887 (ATPase)                                                          |
| P16140 | GO:0046961 (hydrogen ion transporting ATPase activity, rotational mechanism) |
| P17597 | GO:0003984 (acetolactate synthase)                                           |
| P17606 |                                                                              |
| P17751 | GO:0016853 (isomerase)                                                       |
| P17784 | GO:0004332 (fructose-bisphosphate aldolase)                                  |
| P17967 | GO:0015035 (protein disulfide oxidoreductase)                                |
| P18064 | GO:0003924 (GTPase)                                                          |
| P18203 | GO:0003755 (peptidyl-prolyl cis-trans isomerase)                             |
| P18417 |                                                                              |
| P18544 | GO:0003992 (acetylornithine transaminase)                                    |
| P18769 |                                                                              |
| P18899 | GO:0016887 (ATPase)                                                          |
| P19146 | GO:0003924 (GTPase)                                                          |
| P19171 | GO:0004568 (chitinase)                                                       |
| P19404 | GO:0008137 (NADH dehydrogenase (ubiquinone))                                 |
| P19456 | GO:0008553 (hydrogen-exporting ATPase activity, phosphorylative mechanism)   |
| P19882 | GO:0016887 (ATPase)                                                          |
| P20081 | GO:0003755 (peptidyl-prolyl cis-trans isomerase)                             |
| P20133 | GO:0004663 (Rab-protein geranylgeranyltransferase)                           |
| P20444 | GO:0004698 (calcium-dependent protein kinase C)                              |
| P20447 | GO:0008186 (RNA-dependent ATPase)                                            |
| P20478 | GO:0004356 (glutamate-ammonia ligase)                                        |
| P20585 | GO:0000701 (purine-specific mismatch base pair DNA N-glycosylase)            |
| P20606 | GO:0003924 (GTPase)                                                          |
| P20649 | GO:0016887 (ATPase)                                                          |
| P20794 |                                                                              |
| P21127 | GO:0004674 (protein serine/threonine kinase)                                 |
| P21128 | GO:0008236 (serine-type peptidase)                                           |
| P21461 | GO:0016874 (ligase)                                                          |
| P21565 | GO:0003924 (GTPase)                                                          |
| P21801 | GO:0008177 (succinate dehydrogenase (ubiquinone))                            |
| P21888 |                                                                              |
| P22082 | GO:0008094 (DNA-dependent ATPase)                                            |
| P22146 | GO:0042124 (1,3-beta-glucanosyltransferase)                                  |
| P22188 |                                                                              |
| P22333 |                                                                              |
| P22579 | GO:0004407 (histone deacetylase)                                             |
| P22696 | GO:0003755 (peptidyl-prolyl cis-trans isomerase)                             |
| P22894 | GO:0004252 (serine-type endopeptidase)                                       |
| P23179 | GO:0016889 (endodeoxyribonuclease activity, producing 3'-phosphomonoesters)  |
| P23321 | GO:0010242 (oxygen evolving)                                                 |



|        |                                                                                               |
|--------|-----------------------------------------------------------------------------------------------|
| P23396 | GO:0004519 (endonuclease)                                                                     |
| P23509 |                                                                                               |
| P23686 | GO:0004478 (methionine adenosyltransferase)                                                   |
| P23968 | GO:0008553 (hydrogen-exporting ATPase activity, phosphorylative mechanism)                    |
| P24101 | GO:0004601 (peroxidase)                                                                       |
| P24155 | GO:0008233 (peptidase)                                                                        |
| P24230 |                                                                                               |
| P24384 | GO:0000386 (second spliceosomal transesterification)                                          |
| P24487 | GO:0046961 (hydrogen ion transporting ATPase activity, rotational mechanism)                  |
| P24555 |                                                                                               |
| P24704 | GO:0004784 (superoxide dismutase)                                                             |
| P24806 | GO:0016762 (xyloglucan:xyloglucosyl transferase)                                              |
| P25038 | GO:0003924 (GTPase)                                                                           |
| P25087 | GO:0003838 (sterol 24-C-methyltransferase)                                                    |
| P25161 | GO:0004175 (endopeptidase)                                                                    |
| P25296 | GO:0004723 (calcium-dependent protein serine/threonine phosphatase)                           |
| P25323 |                                                                                               |
| P25345 | GO:0004816 (asparagine-tRNA ligase)                                                           |
| P25372 | GO:0015036 (disulfide oxidoreductase)                                                         |
| P25582 | GO:0016435 (rRNA (guanine) methyltransferase)                                                 |
| P25627 | GO:0016435 (rRNA (guanine) methyltransferase)                                                 |
| P25655 | GO:0000175 (3'-5'-exoribonuclease)                                                            |
| P25656 | GO:0004012 (phospholipid-translocating ATPase)                                                |
| P25696 | GO:0004634 (phosphopyruvate hydratase)                                                        |
| P25745 |                                                                                               |
| P25856 |                                                                                               |
| P25857 |                                                                                               |
| P25865 | GO:0004842 (ubiquitin-protein ligase)                                                         |
| P26221 |                                                                                               |
| P26270 | GO:0004175 (endopeptidase)                                                                    |
| P26309 | GO:0004842 (ubiquitin-protein ligase)                                                         |
| P26640 | GO:0004832 (valine-tRNA ligase)                                                               |
| P27298 |                                                                                               |
| P28274 | GO:0003883 (CTP synthase)                                                                     |
| P28331 | GO:0008137 (NADH dehydrogenase (ubiquinone))                                                  |
| P28370 | GO:0008094 (DNA-dependent ATPase)                                                             |
| P28715 | GO:0004520 (endodeoxyribonuclease)                                                            |
| P28817 | GO:0003860 (3-hydroxyisobutyryl-CoA hydrolase)                                                |
| P29029 | GO:0008843 (endochitinase)                                                                    |
| P29102 |                                                                                               |
| P29218 | GO:0008934 (inositol-1(or 4)-monophosphatase)                                                 |
| P29448 | GO:0016671 (oxidoreductase activity, acting on sulfur group of donors, disulfide as acceptor) |
| P29503 | GO:0004842 (ubiquitin-protein ligase)                                                         |
| P29829 | GO:0003924 (GTPase)                                                                           |
| P30041 | GO:0004623 (phospholipase A2)                                                                 |
| P30044 | GO:0004601 (peroxidase)                                                                       |



|        |                                                           |
|--------|-----------------------------------------------------------|
| P30063 |                                                           |
| P30136 |                                                           |
| P30713 | GO:0004364 (glutathione transferase)                      |
| P30839 | GO:0004028 (3-chloroallyl aldehyde dehydrogenase)         |
| P31040 | GO:0000104 (succinate dehydrogenase)                      |
| P31166 | GO:0003999 (adenine phosphoribosyltransferase)            |
| P31244 | GO:0008094 (DNA-dependent ATPase)                         |
| P31383 | GO:0004722 (protein serine/threonine phosphatase)         |
| P31414 | GO:0009678 (hydrogen-translocating pyrophosphatase)       |
| P32333 | GO:0016887 (ATPase)                                       |
| P32345 | GO:0004722 (protein serine/threonine phosphatase)         |
| P32381 | GO:0016887 (ATPase)                                       |
| P32469 | GO:0004164 (diphthine synthase)                           |
| P32473 | GO:0004739 (pyruvate dehydrogenase (acetyl-transferring)) |
| P32573 | GO:0008670 (2,4-dienoyl-CoA reductase (NADPH))            |
| P32643 | GO:0046547 (trans-aconitate 3-methyltransferase)          |
| P32664 |                                                           |
| P32746 | GO:0004152 (dihydroorotate dehydrogenase)                 |
| P32795 |                                                           |
| P32835 | GO:0003924 (GTPase)                                       |
| P32836 | GO:0003924 (GTPase)                                       |
| P33298 | GO:0016887 (ATPase)                                       |
| P33309 | GO:0004521 (endoribonuclease)                             |
| P33363 |                                                           |
| P33760 | GO:0016887 (ATPase)                                       |
| P34099 |                                                           |
| P34222 | GO:0004045 (aminoacyl-tRNA hydrolase)                     |
| P34243 | GO:0043141 (ATP-dependent 5'-3' DNA helicase)             |
| P34314 | GO:0004674 (protein serine/threonine kinase)              |
| P34525 |                                                           |
| P34756 | GO:0000285 (1-phosphatidylinositol-3-phosphate 5-kinase)  |
| P34790 |                                                           |
| P34791 | GO:0003755 (peptidyl-prolyl cis-trans isomerase)          |
| P34896 | GO:0004372 (glycine hydroxymethyltransferase)             |
| P34897 | GO:0004372 (glycine hydroxymethyltransferase)             |
| P35055 |                                                           |
| P35132 | GO:0004842 (ubiquitin-protein ligase)                     |
| P35134 | GO:0004842 (ubiquitin-protein ligase)                     |
| P35196 | GO:0045547 (dehydrodolichyl diphosphate synthase)         |
| P35434 | GO:0016887 (ATPase)                                       |
| P35559 | GO:0016887 (ATPase)                                       |
| P35579 | GO:0030898 (actin-dependent ATPase)                       |
| P35580 | GO:0030898 (actin-dependent ATPase)                       |
| P35670 |                                                           |
| P36015 | GO:0016409 (palmitoyltransferase)                         |
| P36017 | GO:0003924 (GTPase)                                       |
| P36048 | GO:0003924 (GTPase)                                       |
| P36051 | GO:0051377 (mannose-ethanolamine phosphotransferase)      |
| P36060 | GO:0004128 (cytochrome-b5 reductase)                      |

|        |                                                                                                      |
|--------|------------------------------------------------------------------------------------------------------|
| P36104 | GO:0042800 (histone lysine N-methyltransferase activity (H3-K4 specific))                            |
| P36163 | GO:0004222 (metalloendopeptidase)                                                                    |
| P36421 | GO:0004831 (tyrosine-tRNA ligase)                                                                    |
| P36423 | GO:0004796 (thromboxane-A synthase)                                                                  |
| P36542 | GO:0016887 (ATPase)                                                                                  |
| P36590 | GO:0004798 (thymidylate kinase)                                                                      |
| P36591 | GO:0004146 (dihydrofolate reductase)                                                                 |
| P36776 |                                                                                                      |
| P37271 |                                                                                                      |
| P37292 | GO:0004372 (glycine hydroxymethyltransferase)                                                        |
| P37382 | GO:0003899 (DNA-directed RNA polymerase)                                                             |
| P38077 | GO:0016887 (ATPase)                                                                                  |
| P38116 | GO:0003924 (GTPase)                                                                                  |
| P38132 | GO:0043142 (single-stranded DNA-dependent ATPase)                                                    |
| P38197 | GO:0008784 (alanine racemase)                                                                        |
| P38205 | GO:0016428 (tRNA (cytosine-5-)-methyltransferase)                                                    |
| P38219 | GO:0016887 (ATPase)                                                                                  |
| P38230 | GO:0003960 (NADPH:quinone reductase)                                                                 |
| P38242 | GO:0004577 (N-acetylglucosaminylidiphosphodolichol N-acetylglucosaminyltransferase)                  |
| P38298 | GO:0017040 (ceramidase)                                                                              |
| P38336 | GO:0004526 (ribonuclease P)                                                                          |
| P38418 | GO:0016165 (lipoxygenase)                                                                            |
| P38419 | GO:0016166 (phytoene dehydrogenase)                                                                  |
| P38555 | GO:0003924 (GTPase)                                                                                  |
| P38629 | GO:0016887 (ATPase)                                                                                  |
| P38632 | GO:0019789 (SUMO ligase)                                                                             |
| P38659 | GO:0003756 (protein disulfide isomerase)                                                             |
| P38719 | GO:0016887 (ATPase)                                                                                  |
| P38795 | GO:0016811 (hydrolase activity, acting on carbon-nitrogen (but not peptide) bonds, in linear amides) |
| P38797 | GO:0004722 (protein serine/threonine phosphatase)                                                    |
| P38820 | GO:0042292 (URM1 activating enzyme)                                                                  |
| P38911 | GO:0003755 (peptidyl-prolyl cis-trans isomerase)                                                     |
| P38913 | GO:0003919 (FMN adenylyltransferase)                                                                 |
| P38972 |                                                                                                      |
| P38989 | GO:0016887 (ATPase)                                                                                  |
| P39206 |                                                                                                      |
| P39286 |                                                                                                      |
| P39517 | GO:0003724 (RNA helicase)                                                                            |
| P39524 | GO:0004012 (phospholipid-translocating ATPase)                                                       |
| P39656 | GO:0004579 (dolichyl-diphosphooligosaccharide-protein glycotransferase)                              |
| P39726 | GO:0004375 (glycine dehydrogenase (decarboxylating))                                                 |
| P40024 | GO:0042624 (ATPase activity, uncoupled)                                                              |
| P40025 |                                                                                                      |
| P40160 | GO:0004672 (protein kinase)                                                                          |
| P40215 | GO:0003954 (NADH dehydrogenase)                                                                      |
| P40312 | GO:0009055 (electron carrier)                                                                        |
| P40318 | GO:0004842 (ubiquitin-protein ligase)                                                                |

|        |                                                                         |
|--------|-------------------------------------------------------------------------|
| P40341 | GO:0008237 (metallopeptidase)                                           |
| P40371 | GO:0004722 (protein serine/threonine phosphatase)                       |
| P40581 | GO:0047066 (phospholipid-hydroperoxide glutathione peroxidase)          |
| P40938 | GO:0016887 (ATPase)                                                     |
| P40945 | GO:0003956 (NAD(P)+-protein-arginine ADP-ribosyltransferase)            |
| P40989 | GO:0003843 (1,3-beta-glucan synthase)                                   |
| P41338 | GO:0003985 (acetyl-CoA C-acetyltransferase)                             |
| P41543 | GO:0004579 (dolichyl-diphosphooligosaccharide-protein glycotransferase) |
| P41562 |                                                                         |
| P41734 | GO:0016788 (hydrolase activity, acting on ester bonds)                  |
| P41759 | GO:0004618 (phosphoglycerate kinase)                                    |
| P41814 | GO:0016429 (tRNA (adenine-N1-)-methyltransferase)                       |
| P42697 | GO:0003924 (GTPase)                                                     |
| P42743 | GO:0004842 (ubiquitin-protein ligase)                                   |
| P42745 | GO:0004842 (ubiquitin-protein ligase)                                   |
| P42748 | GO:0004842 (ubiquitin-protein ligase)                                   |
| P42770 | GO:0004362 (glutathione-disulfide reductase)                            |
| P42804 | GO:0008883 (glutamyl-tRNA reductase)                                    |
| P42813 | GO:0004540 (ribonuclease)                                               |
| P42862 | GO:0016853 (isomerase)                                                  |
| P42863 | GO:0016853 (isomerase)                                                  |
| P43123 | GO:0003977 (UDP-N-acetylglucosamine diphosphorylase)                    |
| P43254 | GO:0004842 (ubiquitin-protein ligase)                                   |
| P43288 |                                                                         |
| P43289 |                                                                         |
| P43294 |                                                                         |
| P43298 | GO:0004675 (transmembrane receptor protein serine/threonine kinase)     |
| P43311 |                                                                         |
| P43558 | GO:0004843 (ubiquitin-specific protease)                                |
| P43609 | GO:0008094 (DNA-dependent ATPase)                                       |
| P45251 |                                                                         |
| P45478 | GO:0016290 (palmitoyl-CoA hydrolase)                                    |
| P45724 |                                                                         |
| P45725 |                                                                         |
| P45818 | GO:0008186 (RNA-dependent ATPase)                                       |
| P45844 | GO:0034041 (sterol-transporting ATPase)                                 |
| P45951 | GO:0003906 (DNA-(apurinic or apyrimidinic site) lyase)                  |
| P46014 | GO:0004721 (phosphoprotein phosphatase)                                 |
| P46086 | GO:0004496 (mevalonate kinase)                                          |
| P46248 | GO:0004069 (aspartate transaminase)                                     |
| P46273 |                                                                         |
| P46283 | GO:0050278 (sedoheptulose-bisphosphatase)                               |
| P46310 | GO:0042389 (omega-3 fatty acid desaturase)                              |
| P46415 | GO:0051903 (S-(hydroxymethyl)glutathione dehydrogenase)                 |
| P46422 | GO:0004364 (glutathione transferase)                                    |
| P46462 | GO:0016887 (ATPase)                                                     |
| P46573 |                                                                         |
| P46643 | GO:0004069 (aspartate transaminase)                                     |
| P46644 | GO:0004069 (aspartate transaminase)                                     |

|        |                                                                              |
|--------|------------------------------------------------------------------------------|
| P46875 | GO:0016887 (ATPase)                                                          |
| P46934 | GO:0004842 (ubiquitin-protein ligase)                                        |
| P46943 | GO:0003924 (GTPase)                                                          |
| P46964 | GO:0004579 (dolichyl-diphosphooligosaccharide-protein glycotransferase)      |
| P47052 | GO:0008177 (succinate dehydrogenase (ubiquinone))                            |
| P47122 | GO:0016887 (ATPase)                                                          |
| P47735 |                                                                              |
| P47924 | GO:0008686 (3,4-dihydroxy-2-butanone-4-phosphate synthase)                   |
| P47938 | GO:0015036 (disulfide oxidoreductase)                                        |
| P47968 | GO:0004751 (ribose-5-phosphate isomerase)                                    |
| P48011 | GO:0003899 (DNA-directed RNA polymerase)                                     |
| P48047 | GO:0016887 (ATPase)                                                          |
| P48163 | GO:0004473 (malate dehydrogenase (oxaloacetate-decarboxylating) (NADP+))     |
| P48254 |                                                                              |
| P48491 | GO:0004807 (triose-phosphate isomerase)                                      |
| P48582 | GO:0004843 (ubiquitin-specific protease)                                     |
| P48622 | GO:0042389 (omega-3 fatty acid desaturase)                                   |
| P48642 |                                                                              |
| P48651 |                                                                              |
| P49018 | GO:0003923 (GPI-anchor transamidase)                                         |
| P49037 |                                                                              |
| P49077 | GO:0004070 (aspartate carbamoyltransferase)                                  |
| P49095 | GO:0004375 (glycine dehydrogenase (decarboxylating))                         |
| P49432 | GO:0004739 (pyruvate dehydrogenase (acetyl-transferring))                    |
| P49597 | GO:0004722 (protein serine/threonine phosphatase)                            |
| P49598 | GO:0004722 (protein serine/threonine phosphatase)                            |
| P49902 |                                                                              |
| P50076 | GO:0004583 (dolichyl-phosphate-glucose-glycolipid alpha-glucosyltransferase) |
| P50408 | GO:0042625 (ATPase activity, coupled to transmembrane movement of ions)      |
| P50518 | GO:0008553 (hydrogen-exporting ATPase activity, phosphorylative mechanism)   |
| P50579 | GO:0008235 (metalloexopeptidase)                                             |
| P50651 | GO:0004748 (ribonucleoside-diphosphate reductase)                            |
| P50947 | GO:0004407 (histone deacetylase)                                             |
| P50974 |                                                                              |
| P51137 |                                                                              |
| P51139 |                                                                              |
| P51568 |                                                                              |
| P51617 |                                                                              |
| P51698 |                                                                              |
| P51863 | GO:0008553 (hydrogen-exporting ATPase activity, phosphorylative mechanism)   |
| P51996 | GO:0003924 (GTPase)                                                          |
| P52286 | GO:0004842 (ubiquitin-protein ligase)                                        |
| P52416 |                                                                              |
| P52417 |                                                                              |

|        |                                                          |
|--------|----------------------------------------------------------|
| P52420 | GO:0004637 (phosphoribosylamine-glycine ligase)          |
| P52422 | GO:0004644 (phosphoribosylglycinamide formyltransferase) |
| P52424 |                                                          |
| P52701 | GO:0016887 (ATPase)                                      |
| P52867 |                                                          |
| P52910 | GO:0003987 (acetate-CoA ligase)                          |
| P52917 | GO:0016887 (ATPase)                                      |
| P52920 | GO:0016887 (ATPase)                                      |
| P53042 |                                                          |
| P53131 | GO:0004004 (ATP-dependent RNA helicase)                  |
| P53167 | GO:0009982 (pseudouridine synthase)                      |
| P53197 | GO:0004842 (ubiquitin-protein ligase)                    |
| P53202 | GO:0004842 (ubiquitin-protein ligase)                    |
| P53259 | GO:0008233 (peptidase)                                   |
| P53312 | GO:0004775 (succinate-CoA ligase (ADP-forming))          |
| P53331 | GO:0000175 (3'-5'-exoribonuclease)                       |
| P53549 | GO:0016887 (ATPase)                                      |
| P53598 | GO:0004775 (succinate-CoA ligase (ADP-forming))          |
| P53738 | GO:0008276 (protein methyltransferase)                   |
| P53739 | GO:0004672 (protein kinase)                              |
| P53780 | GO:0004121 (cystathionine beta-lyase)                    |
| P53893 | GO:0003924 (GTPase)                                      |
| P53946 | GO:0043140 (ATP-dependent 3'-5' DNA helicase)            |
| P54150 |                                                          |
| P54199 | GO:0004712 (protein serine/threonine/tyrosine kinase)    |
| P54263 | GO:0004816 (asparagine-tRNA ligase)                      |
| P54415 |                                                          |
| P54416 |                                                          |
| P54873 | GO:0004421 (hydroxymethylglutaryl-CoA synthase)          |
| P54886 |                                                          |
| P54967 | GO:0004076 (biotin synthase)                             |
| P54968 | GO:0010211 (IAA-Leu conjugate hydrolase)                 |
| P54970 | GO:0010179 (IAA-Ala conjugate hydrolase)                 |
| P55035 | GO:0004175 (endopeptidase)                               |
| P55217 | GO:0003962 (cystathionine gamma-synthase)                |
| P55230 | GO:0008878 (glucose-1-phosphate adenylyltransferase)     |
| P55233 |                                                          |
| P55861 | GO:0016887 (ATPase)                                      |
| P57054 |                                                          |
| P57748 |                                                          |
| P59267 | GO:0016409 (palmitoyltransferase)                        |
| P59342 |                                                          |
| P60662 | GO:0030898 (actin-dependent ATPase)                      |
| P61517 |                                                          |
| P61957 | GO:0019789 (SUMO ligase)                                 |
| P62898 | GO:0009055 (electron carrier)                            |
| P63281 | GO:0019789 (SUMO ligase)                                 |
| P63331 | GO:0004722 (protein serine/threonine phosphatase)        |
| P65762 |                                                          |

|        |                                                                                                                                      |
|--------|--------------------------------------------------------------------------------------------------------------------------------------|
| P68032 | GO:0016887 (ATPase)                                                                                                                  |
| P68181 | GO:0004691 (cAMP-dependent protein kinase)                                                                                           |
| P68404 | GO:0004697 (protein kinase C)                                                                                                        |
| P69441 |                                                                                                                                      |
| P70054 | GO:0017108 (5'-flap endonuclease)                                                                                                    |
| P70470 | GO:0004622 (lysophospholipase)                                                                                                       |
| P70698 |                                                                                                                                      |
| P70881 |                                                                                                                                      |
| P76083 |                                                                                                                                      |
| P77044 |                                                                                                                                      |
| P77161 |                                                                                                                                      |
| P77256 |                                                                                                                                      |
| P77781 |                                                                                                                                      |
| P78937 | GO:0004781 (sulfate adenylyltransferase (ATP))                                                                                       |
| P79287 |                                                                                                                                      |
| P80244 |                                                                                                                                      |
| P80385 | GO:0004679 (AMP-activated protein kinase)                                                                                            |
| P80386 | GO:0004679 (AMP-activated protein kinase)                                                                                            |
| P82474 |                                                                                                                                      |
| P82808 | GO:0004360 (glutamine-fructose-6-phosphate transaminase (isomerizing))                                                               |
| P83218 |                                                                                                                                      |
| P84029 | GO:0009055 (electron carrier)                                                                                                        |
| P84850 | GO:0051990 ((R)-2-hydroxyglutarate dehydrogenase)                                                                                    |
| P87176 | GO:0004842 (ubiquitin-protein ligase)                                                                                                |
| P87267 |                                                                                                                                      |
| P92923 |                                                                                                                                      |
| P92939 | GO:0005388 (calcium-transporting ATPase)                                                                                             |
| P92949 | GO:0000293 (ferric-chelate reductase)                                                                                                |
| P92958 | GO:0004672 (protein kinase)                                                                                                          |
| P92983 | GO:0004657 (proline dehydrogenase)                                                                                                   |
| P92996 | GO:0050162 (oxalate oxidase)                                                                                                         |
| P93028 | GO:0004842 (ubiquitin-protein ligase)                                                                                                |
| P93031 | GO:0008446 (GDP-mannose 4,6-dehydratase)                                                                                             |
| P93230 |                                                                                                                                      |
| P93422 |                                                                                                                                      |
| P93757 | GO:0004385 (guanylate kinase)                                                                                                        |
| P93805 |                                                                                                                                      |
| P93836 | GO:0003868 (4-hydroxyphenylpyruvate dioxygenase)                                                                                     |
| P93941 |                                                                                                                                      |
| P94040 | GO:0050162 (oxalate oxidase)                                                                                                         |
| P94072 | GO:0050162 (oxalate oxidase)                                                                                                         |
| P97519 | GO:0004419 (hydroxymethylglutaryl-CoA lyase)                                                                                         |
| P99999 | GO:0045155 (electron transporter, transferring electrons from CoQH2-cytochrome c reductase complex and cytochrome c oxidase complex) |
| Q00218 | GO:0003849 (3-deoxy-7-phosphoheptulonate synthase)                                                                                   |
| Q00667 |                                                                                                                                      |
| Q01205 |                                                                                                                                      |
| Q01320 | GO:0003918 (DNA topoisomerase (ATP-hydrolyzing))                                                                                     |
| Q01477 | GO:0004843 (ubiquitin-specific protease)                                                                                             |

|        |                                                                    |
|--------|--------------------------------------------------------------------|
| Q01519 | GO:0004129 (cytochrome-c oxidase)                                  |
| Q01963 |                                                                    |
| Q02527 |                                                                    |
| Q02804 | GO:0003924 (GTPase)                                                |
| Q02972 | GO:0046029 (mannitol dehydrogenase)                                |
| Q03071 | GO:0004842 (ubiquitin-protein ligase)                              |
| Q03161 | GO:0047938 (glucose-6-phosphate 1-epimerase)                       |
| Q03503 | GO:0004596 (peptide alpha-N-acetyltransferase)                     |
| Q03519 |                                                                    |
| Q03529 | GO:0000170 (sphingosine hydroxylase)                               |
| Q03920 | GO:0008757 (S-adenosylmethionine-dependent methyltransferase)      |
| Q04603 | GO:0003887 (DNA-directed DNA polymerase)                           |
| Q04656 |                                                                    |
| Q05568 | GO:0004842 (ubiquitin-protein ligase)                              |
| Q05924 | GO:0042578 (phosphoric ester hydrolase)                            |
| Q05957 |                                                                    |
| Q06060 |                                                                    |
| Q06147 | GO:0017050 (D-erythro-sphingosine kinase)                          |
| Q06205 | GO:0003755 (peptidyl-prolyl cis-trans isomerase)                   |
| Q06489 | GO:0046523 (S-methyl-5-thioribose-1-phosphate isomerase)           |
| Q06504 | GO:0004596 (peptide alpha-N-acetyltransferase)                     |
| Q06548 | GO:0004674 (protein serine/threonine kinase)                       |
| Q06551 | GO:0019706 (protein-cysteine S-palmitoyltransferase)               |
| Q06636 | GO:0051377 (mannose-ethanolamine phosphotransferase)               |
| Q07176 |                                                                    |
| Q07353 |                                                                    |
| Q07356 | GO:0016166 (phytoene dehydrogenase)                                |
| Q07488 |                                                                    |
| Q07536 | GO:0004491 (methylmalonate-semialdehyde dehydrogenase (acylating)) |
| Q07800 | GO:0004721 (phosphoprotein phosphatase)                            |
| Q07864 | GO:0003887 (DNA-directed DNA polymerase)                           |
| Q07923 | GO:0003955 (NAD(P)H dehydrogenase (quinone))                       |
| Q08096 | GO:0003963 (RNA-3'-phosphate cyclase)                              |
| Q08162 | GO:0000175 (3'-5'-exoribonuclease)                                 |
| Q08480 | GO:0004017 (adenylate kinase)                                      |
| Q09028 | GO:0008094 (DNA-dependent ATPase)                                  |
| Q09131 | GO:0003993 (acid phosphatase)                                      |
| Q09154 | GO:0008121 (ubiquinol-cytochrome-c reductase)                      |
| Q09172 | GO:0004722 (protein serine/threonine phosphatase)                  |
| Q09177 | GO:0003899 (DNA-directed RNA polymerase)                           |
| Q09191 | GO:0003899 (DNA-directed RNA polymerase)                           |
| Q09814 | GO:0008990 (rRNA (guanine-N2-)-methyltransferase)                  |
| Q09923 | GO:0050235 (pyridoxal 4-dehydrogenase)                             |
| Q0WP28 | GO:0004656 (procollagen-proline 4-dioxygenase)                     |
| Q0WRJ7 | GO:0016491 (oxidoreductase)                                        |
| Q0WUI9 | GO:0004805 (trehalose-phosphatase)                                 |
| Q10156 |                                                                    |
| Q10711 | GO:0004222 (metalloendopeptidase)                                  |
| Q11002 | GO:0004198 (calcium-dependent cysteine-type endopeptidase)         |



|        |                                                                                               |
|--------|-----------------------------------------------------------------------------------------------|
| Q11136 | GO:0008233 (peptidase)                                                                        |
| Q12154 | GO:0016887 (ATPase)                                                                           |
| Q12165 | GO:0016887 (ATPase)                                                                           |
| Q12196 | GO:0004672 (protein kinase)                                                                   |
| Q12385 | GO:0042171 (lysophosphatidic acid acyltransferase)                                            |
| Q12432 | GO:0004407 (histone deacetylase)                                                              |
| Q12792 | GO:0004713 (protein tyrosine kinase)                                                          |
| Q13216 | GO:0008094 (DNA-dependent ATPase)                                                             |
| Q13268 | GO:0004090 (carbonyl reductase (NADPH))                                                       |
| Q13356 | GO:0004842 (ubiquitin-protein ligase)                                                         |
| Q13489 | GO:0004842 (ubiquitin-protein ligase)                                                         |
| Q13572 |                                                                                               |
| Q13615 | GO:0004725 (protein tyrosine phosphatase)                                                     |
| Q15311 | GO:0043492 (ATPase activity, coupled to movement of substances)                               |
| Q15910 | GO:0042054 (histone methyltransferase)                                                        |
| Q16394 | GO:0016757 (transferase activity, transferring glycosyl groups)                               |
| Q16740 |                                                                                               |
| Q16795 | GO:0003954 (NADH dehydrogenase)                                                               |
| Q16974 |                                                                                               |
| Q1ACB3 | GO:0010357 (homogentisate solanesyltransferase)                                               |
| Q1CSB4 |                                                                                               |
| Q1EC69 | GO:0000254 (C-4 methylsterol oxidase)                                                         |
| Q1EDG4 |                                                                                               |
| Q1H537 | GO:0051744 (3,8-divinyl protochlorophyllide a 8-vinyl reductase)                              |
| Q1KSC5 |                                                                                               |
| Q1PID4 |                                                                                               |
| Q1RS11 |                                                                                               |
| Q1WIQ6 | GO:0008886 (glyceraldehyde-3-phosphate dehydrogenase (NADP+))                                 |
| Q23500 |                                                                                               |
| Q24208 | GO:0042054 (histone methyltransferase)                                                        |
| Q24368 | GO:0008094 (DNA-dependent ATPase)                                                             |
| Q28653 |                                                                                               |
| Q2I8V6 |                                                                                               |
| Q2M4X6 |                                                                                               |
| Q2MHE4 | GO:0016301 (kinase)                                                                           |
| Q2TJA5 |                                                                                               |
| Q2V3Z9 | GO:0000033 (alpha-1,3-mannosyltransferase)                                                    |
| Q2XQ19 |                                                                                               |
| Q2YGU0 |                                                                                               |
| Q2Z1W3 |                                                                                               |
| Q33DL3 |                                                                                               |
| Q38775 |                                                                                               |
| Q38833 | GO:0046408 (chlorophyll synthetase)                                                           |
| Q38853 |                                                                                               |
| Q38854 | GO:0008661 (1-deoxy-D-xylulose-5-phosphate synthase)                                          |
| Q38869 | GO:0004672 (protein kinase)                                                                   |
| Q38879 | GO:0016671 (oxidoreductase activity, acting on sulfur group of donors, disulfide as acceptor) |
| Q38882 | GO:0004630 (phospholipase D)                                                                  |

|        |                                                                                               |
|--------|-----------------------------------------------------------------------------------------------|
| Q38912 | GO:0003924 (GTPase)                                                                           |
| Q38945 | GO:0008441 (3'(2'),5'-bisphosphate nucleotidase)                                              |
| Q38946 | GO:0004353 (glutamate dehydrogenase [NAD(P)+])                                                |
| Q38971 |                                                                                               |
| Q39008 | GO:0004709 (MAP kinase kinase kinase)                                                         |
| Q39010 |                                                                                               |
| Q39016 | GO:0004683 (calmodulin-dependent protein kinase)                                              |
| Q39023 |                                                                                               |
| Q39056 | GO:0003824 (catalytic)                                                                        |
| Q39090 | GO:0004842 (ubiquitin-protein ligase)                                                         |
| Q39129 |                                                                                               |
| Q39152 | GO:0080019 (fatty acyl-CoA reductase (alcohol-forming))                                       |
| Q39208 | GO:0000248 (C-5 sterol desaturase)                                                            |
| Q39219 | GO:0009916 (alternative oxidase)                                                              |
| Q39227 | GO:0008757 (S-adenosylmethionine-dependent methyltransferase)                                 |
| Q39239 | GO:0016671 (oxidoreductase activity, acting on sulfur group of donors, disulfide as acceptor) |
| Q39241 | GO:0016671 (oxidoreductase activity, acting on sulfur group of donors, disulfide as acceptor) |
| Q39249 | GO:0046422 (violaxanthin de-epoxidase)                                                        |
| Q39619 |                                                                                               |
| Q39734 |                                                                                               |
| Q3C2L6 |                                                                                               |
| Q3E840 | GO:0009055 (electron carrier)                                                                 |
| Q3E9X8 | GO:0043765 (T/G mismatch-specific endonuclease)                                               |
| Q3EBA7 | GO:0004839 (ubiquitin activating enzyme)                                                      |
| Q3ECD9 | GO:0004725 (protein tyrosine phosphatase)                                                     |
| Q3ECG5 | GO:0016301 (kinase)                                                                           |
| Q3EDK8 | GO:0009924 (octadecanal decarboxylase)                                                        |
| Q3KTM0 | GO:0000293 (ferric-chelate reductase)                                                         |
| Q3S891 |                                                                                               |
| Q3S893 |                                                                                               |
| Q3TH56 | GO:0042623 (ATPase activity, coupled)                                                         |
| Q3TIE8 | GO:0004148 (dihydrolipoyl dehydrogenase)                                                      |
| Q3TIR0 | GO:0008233 (peptidase)                                                                        |
| Q3TLK5 | GO:0004012 (phospholipid-translocating ATPase)                                                |
| Q3TN04 | GO:0003899 (DNA-directed RNA polymerase)                                                      |
| Q3TQ15 | GO:0003994 (aconitate hydratase)                                                              |
| Q3TQP7 | GO:0003985 (acetyl-CoA C-acetyltransferase)                                                   |
| Q3TWL1 | GO:0008233 (peptidase)                                                                        |
| Q3TY87 | GO:0004334 (fumarylacetoacetase)                                                              |
| Q3U462 | GO:0004568 (chitinase)                                                                        |
| Q3U7E0 | GO:0016887 (ATPase)                                                                           |
| Q3UCW4 | GO:0008233 (peptidase)                                                                        |
| Q3UDY1 | GO:0004032 (aldehyde reductase)                                                               |
| Q3UFJ3 | GO:0004738 (pyruvate dehydrogenase)                                                           |
| Q3UGH3 | GO:0004559 (alpha-mannosidase)                                                                |
| Q3UJW9 | GO:0047939 (L-glucuronate reductase)                                                          |
| Q3UN02 | GO:0008415 (acyltransferase)                                                                  |

|        |                                                                                               |
|--------|-----------------------------------------------------------------------------------------------|
| Q3V335 | GO:0004842 (ubiquitin-protein ligase)                                                         |
| Q3ZCQ8 | GO:0004725 (protein tyrosine phosphatase)                                                     |
| Q40353 |                                                                                               |
| Q40412 |                                                                                               |
| Q40532 |                                                                                               |
| Q40588 |                                                                                               |
| Q40672 |                                                                                               |
| Q40673 |                                                                                               |
| Q40677 | GO:0004332 (fructose-bisphosphate aldolase)                                                   |
| Q41158 |                                                                                               |
| Q41342 |                                                                                               |
| Q41370 |                                                                                               |
| Q41376 |                                                                                               |
| Q42403 | GO:0016671 (oxidoreductase activity, acting on sulfur group of donors, disulfide as acceptor) |
| Q42472 | GO:0004351 (glutamate decarboxylase)                                                          |
| Q42521 | GO:0004351 (glutamate decarboxylase)                                                          |
| Q42523 | GO:0004485 (methylcrotonoyl-CoA carboxylase)                                                  |
| Q42524 | GO:0016207 (4-coumarate-CoA ligase)                                                           |
| Q42525 | GO:0008865 (fructokinase)                                                                     |
| Q42527 | GO:0004640 (phosphoribosylanthranilate isomerase)                                             |
| Q42529 | GO:0004834 (tryptophan synthase)                                                              |
| Q42536 |                                                                                               |
| Q42540 | GO:0004842 (ubiquitin-protein ligase)                                                         |
| Q42546 | GO:0008441 (3'(2'),5'-bisphosphate nucleotidase)                                              |
| Q42551 | GO:0019789 (SUMO ligase)                                                                      |
| Q42561 | GO:0016297 (acyl-[acyl-carrier-protein] hydrolase)                                            |
| Q42563 | GO:0003999 (adenine phosphoribosyltransferase)                                                |
| Q42569 |                                                                                               |
| Q42586 | GO:0004590 (orotidine-5'-phosphate decarboxylase)                                             |
| Q42588 | GO:0009001 (serine O-acetyltransferase)                                                       |
| Q42605 | GO:0003978 (UDP-glucose 4-epimerase)                                                          |
| Q42645 |                                                                                               |
| Q42880 |                                                                                               |
| Q43157 | GO:0004750 (ribulose-phosphate 3-epimerase)                                                   |
| Q43234 |                                                                                               |
| Q43295 | GO:0004020 (adenylylsulfate kinase)                                                           |
| Q43314 | GO:0004353 (glutamate dehydrogenase [NAD(P)+])                                                |
| Q43316 | GO:0004418 (hydroxymethylbilane synthase)                                                     |
| Q43387 | GO:0004601 (peroxidase)                                                                       |
| Q43503 |                                                                                               |
| Q43725 | GO:0004124 (cysteine synthase)                                                                |
| Q43816 |                                                                                               |
| Q43866 | GO:0004564 (beta-fructofuranosidase)                                                          |
| Q43870 | GO:0004781 (sulfate adenylyltransferase (ATP))                                                |
| Q45QT1 |                                                                                               |
| Q46978 |                                                                                               |
| Q47098 |                                                                                               |
| Q48296 |                                                                                               |

|        |                                                                       |
|--------|-----------------------------------------------------------------------|
| Q4AE87 |                                                                       |
| Q4AEC5 |                                                                       |
| Q4FE45 | GO:0004842 (ubiquitin-protein ligase)                                 |
| Q4G176 | GO:0016878 (acid-thiol ligase)                                        |
| Q4G338 |                                                                       |
| Q4KML2 | GO:0003904 (deoxyribodipyrimidine photo-lyase)                        |
| Q4LB57 |                                                                       |
| Q4PS45 | GO:0004842 (ubiquitin-protein ligase)                                 |
| Q4TU14 | GO:0004842 (ubiquitin-protein ligase)                                 |
| Q500Y9 | GO:0042736 (NADH kinase)                                              |
| Q504P4 | GO:0042623 (ATPase activity, coupled)                                 |
| Q52K88 | GO:0016787 (hydrolase)                                                |
| Q52T38 | GO:0016417 (S-acyltransferase)                                        |
| Q53ZN0 |                                                                       |
| Q540V7 | GO:0008236 (serine-type peptidase)                                    |
| Q542E7 | GO:0004722 (protein serine/threonine phosphatase)                     |
| Q545F0 | GO:0050178 (phenylpyruvate tautomerase)                               |
| Q545L9 | GO:0004719 (protein-L-isoaspartate (D-aspartate) O-methyltransferase) |
| Q563I3 |                                                                       |
| Q564E2 | GO:0004459 (L-lactate dehydrogenase)                                  |
| Q564P2 |                                                                       |
| Q56WD9 | GO:0003988 (acetyl-CoA C-acyltransferase)                             |
| Q56WN1 | GO:0004356 (glutamate-ammonia ligase)                                 |
| Q56Y11 | GO:0045547 (dehydrodolichyl diphosphate synthase)                     |
| Q56YA5 | GO:0050281 (serine-glyoxylate transaminase)                           |
| Q56YN3 | GO:0042736 (NADH kinase)                                              |
| Q56YP2 | GO:0016308 (1-phosphatidylinositol-4-phosphate 5-kinase)              |
| Q56ZN6 | GO:0009678 (hydrogen-translocating pyrophosphatase)                   |
| Q596C5 |                                                                       |
| Q596W8 |                                                                       |
| Q596W9 |                                                                       |
| Q598P5 |                                                                       |
| Q59993 |                                                                       |
| Q59H18 | GO:0004672 (protein kinase)                                           |
| Q5CCT8 |                                                                       |
| Q5D4P8 |                                                                       |
| Q5DKU8 |                                                                       |
| Q5DKU9 |                                                                       |
| Q5ECE3 |                                                                       |
| Q5GA13 | GO:0016262 (protein N-acetylglucosaminyltransferase)                  |
| Q5H8A4 | GO:0051267 (CP2 mannose-ethanolamine phosphotransferase)              |
| Q5I1Y5 | GO:0042623 (ATPase activity, coupled)                                 |
| Q5IBM5 | GO:0004842 (ubiquitin-protein ligase)                                 |
| Q5ICC1 |                                                                       |
| Q5ICG6 | GO:0004467 (long-chain-fatty-acid-CoA ligase)                         |
| Q5IHX6 |                                                                       |
| Q5IW12 |                                                                       |
| Q5KTR2 |                                                                       |
| Q5M731 | GO:0008972 (phosphomethylpyrimidine kinase)                           |

|        |                                                       |
|--------|-------------------------------------------------------|
| Q5M969 | GO:0050124 (N-acylneuraminate-9-phosphatase)          |
| Q5PQX0 | GO:0048040 (UDP-glucuronate decarboxylase)            |
| Q5RH13 | GO:0004842 (ubiquitin-protein ligase)                 |
| Q5RZ62 |                                                       |
| Q5SGD2 |                                                       |
| Q5U3Z7 | GO:0008732 (L-allo-threonine aldolase)                |
| Q5U430 | GO:0004842 (ubiquitin-protein ligase)                 |
| Q5USC3 |                                                       |
| Q5VQG4 | GO:0047274 (galactinol-sucrose galactosyltransferase) |
| Q5W7F1 | GO:0017040 (ceramidase)                               |
| Q5XF33 | GO:0016887 (ATPase)                                   |
| Q5XIF3 | GO:0008137 (NADH dehydrogenase (ubiquinone))          |
| Q5YDB6 | GO:0019204 (nucleotide phosphatase)                   |
| Q5YFA2 |                                                       |
| Q5Z6G7 |                                                       |
| Q60676 | GO:0004721 (phosphoprotein phosphatase)               |
| Q60720 | GO:0000293 (ferric-chelate reductase)                 |
| Q61074 | GO:0004721 (phosphoprotein phosphatase)               |
| Q61144 | GO:0004175 (endopeptidase)                            |
| Q62226 | GO:0016787 (hydrolase)                                |
| Q64620 | GO:0004722 (protein serine/threonine phosphatase)     |
| Q64654 | GO:0008398 (sterol 14-demethylase)                    |
| Q64MA3 | GO:0048256 (flap endonuclease)                        |
| Q65CJ7 |                                                       |
| Q66GP9 | GO:0004517 (nitric-oxide synthase)                    |
| Q66Q58 |                                                       |
| Q675A5 | GO:0047499 (calcium-independent phospholipase A2)     |
| Q67C39 |                                                       |
| Q680Q4 | GO:0019789 (SUMO ligase)                              |
| Q68AP4 |                                                       |
| Q68BJ4 |                                                       |
| Q68RJ8 |                                                       |
| Q69AX6 |                                                       |
| Q6AYS7 |                                                       |
| Q6DNI8 |                                                       |
| Q6EMC1 |                                                       |
| Q6F3I7 |                                                       |
| Q6H8W7 |                                                       |
| Q6H9K0 | GO:0047911 (galacturan 1,4-alpha-galacturonidase)     |
| Q6IVK5 |                                                       |
| Q6IVK8 |                                                       |
| Q6IVV3 |                                                       |
| Q6L619 |                                                       |
| Q6L8K4 |                                                       |
| Q6NLQ6 | GO:0004698 (calcium-dependent protein kinase C)       |
| Q6NPD7 | GO:0047631 (ADP-ribose diphosphatase)                 |
| Q6NQB7 | GO:0048531 (beta-1,3-galactosyltransferase)           |
| Q6NQJ6 | GO:0000175 (3'-5'-exoribonuclease)                    |
| Q6P8N8 | GO:0016887 (ATPase)                                   |

|        |                                                                                   |
|--------|-----------------------------------------------------------------------------------|
| Q6PCN7 | GO:0016887 (ATPase)                                                               |
| Q6PD18 | GO:0008237 (metallopeptidase)                                                     |
| Q6PHC1 | GO:0004634 (phosphopyruvate hydratase)                                            |
| Q6PLH8 |                                                                                   |
| Q6PTT0 |                                                                                   |
| Q6PY95 |                                                                                   |
| Q6Q0C0 | GO:0004842 (ubiquitin-protein ligase)                                             |
| Q6Q796 |                                                                                   |
| Q6RFY3 |                                                                                   |
| Q6RFY4 |                                                                                   |
| Q6SJP5 |                                                                                   |
| Q6T5D1 |                                                                                   |
| Q6TGX5 | GO:0004842 (ubiquitin-protein ligase)                                             |
| Q6TW99 |                                                                                   |
| Q6TXD0 |                                                                                   |
| Q6UB35 |                                                                                   |
| Q6URB0 |                                                                                   |
| Q6VNB8 | GO:0003831 (beta-N-acetylglucosaminylglycopeptide beta-1,4-galactosyltransferase) |
| Q6WAU0 |                                                                                   |
| Q6WNR0 |                                                                                   |
| Q6XBF8 | GO:0004190 (aspartic-type endopeptidase)                                          |
| Q6XQN6 | GO:0004516 (nicotinate phosphoribosyltransferase)                                 |
| Q6XZ78 |                                                                                   |
| Q6XZ79 |                                                                                   |
| Q6YP15 |                                                                                   |
| Q6Z744 |                                                                                   |
| Q6ZFH6 |                                                                                   |
| Q6ZHS4 | GO:0045551 (cinnamyl-alcohol dehydrogenase)                                       |
| Q6ZIX2 |                                                                                   |
| Q6ZWM8 | GO:0004722 (protein serine/threonine phosphatase)                                 |
| Q6ZY51 | GO:0051752 (phosphoglucan, water dikinase)                                        |
| Q70G32 |                                                                                   |
| Q711R0 |                                                                                   |
| Q71DJ5 | GO:0047714 (galactolipase)                                                        |
| Q71SH3 |                                                                                   |
| Q724I0 | GO:0016887 (ATPase)                                                               |
| Q75BQ6 |                                                                                   |
| Q75W54 |                                                                                   |
| Q764C1 |                                                                                   |
| Q76E52 |                                                                                   |
| Q76FR9 |                                                                                   |
| Q76FS5 | GO:0050347 (trans-octaprenyltranstransferase)                                     |
| Q76KF5 |                                                                                   |
| Q78J03 | GO:0000318 (protein-methionine-R-oxide reductase)                                 |
| Q7FRX8 |                                                                                   |
| Q7G193 | GO:0050302 (indole-3-acetaldehyde oxidase)                                        |
| Q7G9P4 | GO:0050302 (indole-3-acetaldehyde oxidase)                                        |
| Q7JYV7 | GO:0004017 (adenylate kinase)                                                     |

|        |                                                                                         |
|--------|-----------------------------------------------------------------------------------------|
| Q7KF27 |                                                                                         |
| Q7KMP8 | GO:0004175 (endopeptidase)                                                              |
| Q7KTH8 | GO:0019781 (NEDD8 activating enzyme)                                                    |
| Q7KVA1 | GO:0030158 (protein xylosyltransferase)                                                 |
| Q7L1T6 | GO:0016653 (oxidoreductase activity, acting on NADH or NADPH, heme protein as acceptor) |
| Q7WTU5 |                                                                                         |
| Q7X9A9 |                                                                                         |
| Q7X9J0 |                                                                                         |
| Q7X9V3 | GO:0008080 (N-acetyltransferase)                                                        |
| Q7XA48 |                                                                                         |
| Q7XB08 |                                                                                         |
| Q7XJ65 |                                                                                         |
| Q7XJ98 | GO:0016757 (transferase activity, transferring glycosyl groups)                         |
| Q7XJR6 |                                                                                         |
| Q7XZE6 |                                                                                         |
| Q7XZQ6 |                                                                                         |
| Q7XZQ7 |                                                                                         |
| Q7Y051 |                                                                                         |
| Q7Y0K5 |                                                                                         |
| Q7Y1X1 | GO:0016788 (hydrolase activity, acting on ester bonds)                                  |
| Q7Y232 | GO:0035251 (UDP-glucosyltransferase)                                                    |
| Q7YUC7 |                                                                                         |
| Q804C3 | GO:0004738 (pyruvate dehydrogenase)                                                     |
| Q805F3 | GO:0004190 (aspartic-type endopeptidase)                                                |
| Q80TU3 | GO:0004842 (ubiquitin-protein ligase)                                                   |
| Q80W94 | GO:0016407 (acetyltransferase)                                                          |
| Q80YN4 | GO:0004252 (serine-type endopeptidase)                                                  |
| Q83V27 |                                                                                         |
| Q84JH7 | GO:0051266 (sirohchlorin ferrochelatase)                                                |
| Q84JN3 | GO:0003899 (DNA-directed RNA polymerase)                                                |
| Q84JU4 | GO:0033549 (MAP kinase phosphatase)                                                     |
| Q84JZ7 | GO:0004842 (ubiquitin-protein ligase)                                                   |
| Q84LE3 |                                                                                         |
| Q84LH3 | GO:0008408 (3'-5' exonuclease)                                                          |
| Q84LM4 |                                                                                         |
| Q84MA2 | GO:0046030 (inositol trisphosphate phosphatase)                                         |
| Q84MB6 |                                                                                         |
| Q84MD8 | GO:0008531 (riboflavin kinase)                                                          |
| Q84TG3 | GO:0004842 (ubiquitin-protein ligase)                                                   |
| Q84UH6 |                                                                                         |
| Q84UV8 | GO:0016656 (monodehydroascorbate reductase (NADH))                                      |
| Q84V83 |                                                                                         |
| Q84VW9 | GO:0008964 (phosphoenolpyruvate carboxylase)                                            |
| Q84WL2 | GO:0047627 (adenylsulfatase)                                                            |
| Q84WS0 | GO:0004252 (serine-type endopeptidase)                                                  |
| Q84XU2 | GO:0004721 (phosphoprotein phosphatase)                                                 |
| Q84Y95 | GO:0015038 (glutathione disulfide oxidoreductase)                                       |
| Q84YG5 |                                                                                         |



|        |                                                                                                                |
|--------|----------------------------------------------------------------------------------------------------------------|
| Q84ZT8 |                                                                                                                |
| Q84ZW8 |                                                                                                                |
| Q852S9 |                                                                                                                |
| Q852T2 |                                                                                                                |
| Q86RB1 |                                                                                                                |
| Q86TM6 | GO:0016881 (acid-amino acid ligase)                                                                            |
| Q86U44 | GO:0016422 (mRNA (2'-O-methyladenosine-N6-)-methyltransferase)                                                 |
| Q86UW6 | GO:0046404 (ATP-dependent polydeoxyribonucleotide 5'-hydroxyl-kinase)                                          |
| Q86VF5 |                                                                                                                |
| Q86VQ3 | GO:0004791 (thioredoxin-disulfide reductase)                                                                   |
| Q8BFW6 | GO:0017111 (nucleoside-triphosphatase)                                                                         |
| Q8BGM2 | GO:0004349 (glutamate 5-kinase)                                                                                |
| Q8BMC1 | GO:0008553 (hydrogen-exporting ATPase activity, phosphorylative mechanism)                                     |
| Q8BPD3 | GO:0004601 (peroxidase)                                                                                        |
| Q8BS26 | GO:0004672 (protein kinase)                                                                                    |
| Q8BSK8 | GO:0004672 (protein kinase)                                                                                    |
| Q8BXQ2 | GO:0003923 (GPI-anchor transamidase)                                                                           |
| Q8BYK4 |                                                                                                                |
| Q8C653 | GO:0008821 (crossover junction endodeoxyribonuclease)                                                          |
| Q8CGB9 |                                                                                                                |
| Q8CJE3 | GO:0030898 (actin-dependent ATPase)                                                                            |
| Q8FFP9 |                                                                                                                |
| Q8GR61 |                                                                                                                |
| Q8GSJ1 | GO:0003879 (ATP phosphoribosyltransferase)                                                                     |
| Q8GSM7 |                                                                                                                |
| Q8GSN8 |                                                                                                                |
| Q8GSQ1 | GO:0004497 (monooxygenase)                                                                                     |
| Q8GTR4 | GO:0010303 (limit dextrinase)                                                                                  |
| Q8GUQ8 | GO:0004854 (xanthine dehydrogenase)                                                                            |
| Q8GV29 |                                                                                                                |
| Q8GVD7 |                                                                                                                |
| Q8GVE8 | GO:0008964 (phosphoenolpyruvate carboxylase)                                                                   |
| Q8GW31 | GO:0050072 (m7G(5')pppN diphosphatase)                                                                         |
| Q8GWA1 | GO:0003954 (NADH dehydrogenase)                                                                                |
| Q8GWW7 | GO:0047632 (agmatine deiminase)                                                                                |
| Q8GXC1 | GO:0004067 (asparaginase)                                                                                      |
| Q8GXR5 | GO:0004632 (phosphopantothenate--cysteine ligase)                                                              |
| Q8GXU8 | GO:0003841 (1-acylglycerol-3-phosphate O-acyltransferase)                                                      |
| Q8GXV2 | GO:0003756 (protein disulfide isomerase)                                                                       |
| Q8GXX3 | GO:0016682 (oxidoreductase activity, acting on diphenols and related substances as donors, oxygen as acceptor) |
| Q8GY23 | GO:0004842 (ubiquitin-protein ligase)                                                                          |
| Q8GY31 | GO:0030611 (arsenate reductase)                                                                                |
| Q8GY89 | GO:0016667 (oxidoreductase activity, acting on sulfur group of donors)                                         |
| Q8GZ86 |                                                                                                                |
| Q8GZD5 |                                                                                                                |
| Q8GZS9 |                                                                                                                |
| Q8H0L8 |                                                                                                                |

|        |                                                                                               |
|--------|-----------------------------------------------------------------------------------------------|
| Q8H0P4 |                                                                                               |
| Q8H0P5 |                                                                                               |
| Q8H0P6 |                                                                                               |
| Q8H0W1 | GO:0008233 (peptidase)                                                                        |
| Q8H136 | GO:0016887 (ATPase)                                                                           |
| Q8H183 | GO:0003837 (beta-ureidopropionase)                                                            |
| Q8H1H6 |                                                                                               |
| Q8H1H7 |                                                                                               |
| Q8H943 |                                                                                               |
| Q8H9F1 |                                                                                               |
| Q8INK9 | GO:0000318 (protein-methionine-R-oxide reductase)                                             |
| Q8IRW8 | GO:0042800 (histone lysine N-methyltransferase activity (H3-K4 specific))                     |
| Q8IUH5 | GO:0019706 (protein-cysteine S-palmitoleyltransferase)                                        |
| Q8IV48 | GO:0008408 (3'-5' exonuclease)                                                                |
| Q8IYB8 | GO:0003678 (DNA helicase)                                                                     |
| Q8KDI7 |                                                                                               |
| Q8KTI8 |                                                                                               |
| Q8L3C9 |                                                                                               |
| Q8L3U4 | GO:0008967 (phosphoglycolate phosphatase)                                                     |
| Q8L4H0 | GO:0004672 (protein kinase)                                                                   |
| Q8L5E1 |                                                                                               |
| Q8L5J1 |                                                                                               |
| Q8L5Y9 | GO:0004594 (pantothenate kinase)                                                              |
| Q8L640 | GO:0008240 (tripeptidyl-peptidase)                                                            |
| Q8L649 | GO:0004842 (ubiquitin-protein ligase)                                                         |
| Q8L6Y1 | GO:0004843 (ubiquitin-specific protease)                                                      |
| Q8L799 | GO:0050113 (inositol oxygenase)                                                               |
| Q8L7F9 | GO:0010488 (UDP-galactose:N-glycan beta-1,3-galactosyltransferase)                            |
| Q8L7R2 | GO:0004413 (homoserine kinase)                                                                |
| Q8L7S6 | GO:0015929 (hexosaminidase)                                                                   |
| Q8L9C4 | GO:0045703 (ketoreductase)                                                                    |
| Q8L9W3 | GO:0004842 (ubiquitin-protein ligase)                                                         |
| Q8LA53 | GO:0051747 (DNA demethylase)                                                                  |
| Q8LAD0 | GO:0004359 (glutaminase)                                                                      |
| Q8LAM0 | GO:0004843 (ubiquitin-specific protease)                                                      |
| Q8LAS8 | GO:0018738 (S-formylglutathione hydrolase)                                                    |
| Q8LBA6 | GO:0003881 (CDP-diacylglycerol-inositol 3-phosphatidyltransferase)                            |
| Q8LCE1 | GO:0004356 (glutamate-ammonia ligase)                                                         |
| Q8LCT3 | GO:0016671 (oxidoreductase activity, acting on sulfur group of donors, disulfide as acceptor) |
| Q8LDP4 | GO:0003755 (peptidyl-prolyl cis-trans isomerase)                                              |
| Q8LDU4 | GO:0051743 (red chlorophyll catabolite reductase)                                             |
| Q8LE52 | GO:0045174 (glutathione dehydrogenase (ascorbate))                                            |
| Q8LFP9 | GO:0016860 (intramolecular oxidoreductase)                                                    |
| Q8LG50 | GO:0003841 (1-acylglycerol-3-phosphate O-acyltransferase)                                     |
| Q8LK04 |                                                                                               |
| Q8LK56 | GO:0019104 (DNA N-glycosylase)                                                                |
| Q8LKS7 |                                                                                               |
| Q8LLD7 |                                                                                               |

|        |                                                                   |
|--------|-------------------------------------------------------------------|
| Q8LPQ4 | GO:0046429 (4-hydroxy-3-methylbut-2-en-1-yl diphosphate synthase) |
| Q8LSZ3 |                                                                   |
| Q8MPM5 |                                                                   |
| Q8MPP3 | GO:0004222 (metalloendopeptidase)                                 |
| Q8N5B7 | GO:0050291 (sphingosine N-acyltransferase)                        |
| Q8NBQ5 | GO:0016229 (steroid dehydrogenase)                                |
| Q8NKD2 |                                                                   |
| Q8PX97 |                                                                   |
| Q8QGQ2 | GO:0004028 (3-chloroallyl aldehyde dehydrogenase)                 |
| Q8R0N9 | GO:0016409 (palmitoyltransferase)                                 |
| Q8R0X4 | GO:0016301 (kinase)                                               |
| Q8R431 | GO:0016787 (hydrolase)                                            |
| Q8RR74 |                                                                   |
| Q8RU27 |                                                                   |
| Q8RUW5 | GO:0016754 (sinapoylglucose-malate O-sinapoyltransferase)         |
| Q8RVK9 |                                                                   |
| Q8RW99 |                                                                   |
| Q8RWE2 | GO:0004805 (trehalose-phosphatase)                                |
| Q8RWE8 | GO:0010475 (galactose-1-phosphate guanylyltransferase (GDP))      |
| Q8RWF1 | GO:0030267 (glyoxylate reductase (NADP))                          |
| Q8RWM1 | GO:0004161 (dimethylallyltranstransferase)                        |
| Q8RWN7 | GO:0004722 (protein serine/threonine phosphatase)                 |
| Q8RWT5 | GO:0003937 (IMP cyclohydrolase)                                   |
| Q8RWV4 | GO:0009974 (epsilon hydroxylase)                                  |
| Q8RWW0 | GO:0016301 (kinase)                                               |
| Q8RWZ3 | GO:0003995 (acyl-CoA dehydrogenase)                               |
| Q8RXD4 | GO:0004842 (ubiquitin-protein ligase)                             |
| Q8RXD6 | GO:0004842 (ubiquitin-protein ligase)                             |
| Q8RXU4 | GO:0004793 (threonine aldolase)                                   |
| Q8RXV3 | GO:0004722 (protein serine/threonine phosphatase)                 |
| Q8S313 |                                                                   |
| Q8S315 |                                                                   |
| Q8S4F6 | GO:0046510 (UDP-sulfoquinovose:DAG sulfoquinovosyltransferase)    |
| Q8S4R4 |                                                                   |
| Q8S564 |                                                                   |
| Q8S8F9 | GO:0008936 (nicotinamidase)                                       |
| Q8S8S9 | GO:0016788 (hydrolase activity, acting on ester bonds)            |
| Q8S945 |                                                                   |
| Q8S948 | GO:0050347 (trans-octaprenyltranstransferase)                     |
| Q8SYG2 | GO:0019781 (NEDD8 activating enzyme)                              |
| Q8T066 | GO:0016887 (ATPase)                                               |
| Q8T0N8 |                                                                   |
| Q8TC12 |                                                                   |
| Q8VDC3 | GO:0003994 (aconitate hydratase)                                  |
| Q8VDP3 | GO:0004497 (monooxygenase)                                        |
| Q8VED0 | GO:0004494 (methylmalonyl-CoA mutase)                             |
| Q8VWE9 |                                                                   |
| Q8VWG5 |                                                                   |

|        |                                                                                               |
|--------|-----------------------------------------------------------------------------------------------|
| Q8VWG7 | GO:0016671 (oxidoreductase activity, acting on sulfur group of donors, disulfide as acceptor) |
| Q8VWH7 |                                                                                               |
| Q8VWJ1 | GO:0010176 (homogentisate phytyltransferase)                                                  |
| Q8VWN6 |                                                                                               |
| Q8VYF5 | GO:0050126 (N-carbamoylputrescine amidase)                                                    |
| Q8VYI1 | GO:0000170 (sphingosine hydroxylase)                                                          |
| Q8VYI3 | GO:0080023 (3R-hydroxyacyl-CoA dehydratase)                                                   |
| Q8VYJ1 | GO:0008756 (o-succinylbenzoate-CoA ligase)                                                    |
| Q8VYS2 |                                                                                               |
| Q8VYU3 |                                                                                               |
| Q8VZ17 | GO:0008168 (methyltransferase)                                                                |
| Q8VZB2 | GO:0004300 (enoyl-CoA hydratase)                                                              |
| Q8VZC3 | GO:0003842 (1-pyrroline-5-carboxylate dehydrogenase)                                          |
| Q8VZH2 | GO:0004177 (aminopeptidase)                                                                   |
| Q8VZW3 |                                                                                               |
| Q8W000 |                                                                                               |
| Q8W012 |                                                                                               |
| Q8W040 | GO:0004326 (tetrahydrofolylpolyglutamate synthase)                                            |
| Q8W041 | GO:0008841 (dihydrofolate synthase)                                                           |
| Q8W1A0 |                                                                                               |
| Q8W1S1 | GO:0046481 (digalactosyldiacylglycerol synthase)                                              |
| Q8W1W9 |                                                                                               |
| Q8W1X2 | GO:0008478 (pyridoxal kinase)                                                                 |
| Q8W2B8 | GO:0009001 (serine O-acetyltransferase)                                                       |
| Q8W468 | GO:0004842 (ubiquitin-protein ligase)                                                         |
| Q8W471 | GO:0008922 (long-chain-fatty-acid-[acyl-carrier-protein] ligase)                              |
| Q8W4C7 | GO:0019148 (D-cysteine desulfhydrase)                                                         |
| Q8W4K6 | GO:0003924 (GTPase)                                                                           |
| Q8W5A2 |                                                                                               |
| Q8X1V7 |                                                                                               |
| Q8YC53 |                                                                                               |
| Q90YZ8 |                                                                                               |
| Q91XT9 |                                                                                               |
| Q91YM8 | GO:0004748 (ribonucleoside-diphosphate reductase)                                             |
| Q91YR1 | GO:0004713 (protein tyrosine kinase)                                                          |
| Q920P0 |                                                                                               |
| Q920R6 | GO:0008553 (hydrogen-exporting ATPase activity, phosphorylative mechanism)                    |
| Q921A4 | GO:0004601 (peroxidase)                                                                       |
| Q921S5 | GO:0008553 (hydrogen-exporting ATPase activity, phosphorylative mechanism)                    |
| Q92210 |                                                                                               |
| Q922D8 | GO:0016155 (formyltetrahydrofolate dehydrogenase)                                             |
| Q92355 | GO:0043141 (ATP-dependent 5'-3' DNA helicase)                                                 |
| Q923V3 | GO:0004843 (ubiquitin-specific protease)                                                      |
| Q924Z4 | GO:0050291 (sphingosine N-acyltransferase)                                                    |
| Q92630 | GO:0004713 (protein tyrosine kinase)                                                          |
| Q92793 | GO:0016407 (acetyltransferase)                                                                |

|        |                                                                     |
|--------|---------------------------------------------------------------------|
| Q93009 | GO:0004843 (ubiquitin-specific protease)                            |
| Q93063 | GO:0016757 (transferase activity, transferring glycosyl groups)     |
| Q936S7 |                                                                     |
| Q93KB8 |                                                                     |
| Q93RE3 |                                                                     |
| Q93V56 | GO:0004427 (inorganic diphosphatase)                                |
| Q93V58 | GO:0016301 (kinase)                                                 |
| Q93V61 |                                                                     |
| Q93V78 |                                                                     |
| Q93VK5 | GO:0010291 (carotene beta-ring hydroxylase)                         |
| Q93VR3 | GO:0047918 (GDP-mannose 3,5-epimerase)                              |
| Q93W54 | GO:0004671 (protein-S-isoprenylcysteine O-methyltransferase)        |
| Q93X74 |                                                                     |
| Q93XE1 |                                                                     |
| Q93XG4 |                                                                     |
| Q93XJ2 |                                                                     |
| Q93Y07 | GO:0008422 (beta-glucosidase)                                       |
| Q93Y23 | GO:0004499 (flavin-containing monooxygenase)                        |
| Q93YN0 | GO:0003756 (protein disulfide isomerase)                            |
| Q93YN9 | GO:0035299 (inositol pentakisphosphate 2-kinase)                    |
| Q93Z33 | GO:0003924 (GTPase)                                                 |
| Q93Z53 | GO:0004743 (pyruvate kinase)                                        |
| Q93ZG7 | GO:0008186 (RNA-dependent ATPase)                                   |
| Q93ZK8 |                                                                     |
| Q93ZN9 | GO:0010285 (L,L-diaminopimelate aminotransferase)                   |
| Q93ZW0 | GO:0004345 (glucose-6-phosphate dehydrogenase)                      |
| Q940D4 | GO:0004558 (alpha-glucosidase)                                      |
| Q940M2 | GO:0008453 (alanine-glyoxylate transaminase)                        |
| Q941L0 | GO:0016759 (cellulose synthase)                                     |
| Q944Q0 | GO:0004672 (protein kinase)                                         |
| Q945K2 |                                                                     |
| Q94882 | GO:0030898 (actin-dependent ATPase)                                 |
| Q948S7 |                                                                     |
| Q949X0 | GO:0009979 (16:0 monogalactosyldiacylglycerol desaturase)           |
| Q949X3 | GO:0004400 (histidinol-phosphate transaminase)                      |
| Q949Y0 | GO:0004843 (ubiquitin-specific protease)                            |
| Q949Y5 | GO:0004222 (metalloendopeptidase)                                   |
| Q94AA9 | GO:0035252 (UDP-xylosyltransferase)                                 |
| Q94AG2 | GO:0004675 (transmembrane receptor protein serine/threonine kinase) |
| Q94AS5 | GO:0010296 (prenylcysteine methylesterase)                          |
| Q94AX4 | GO:0019154 (glycolate dehydrogenase)                                |
| Q94AY3 | GO:0004842 (ubiquitin-protein ligase)                               |
| Q94B07 |                                                                     |
| Q94B35 | GO:0051745 (4-hydroxy-3-methylbut-2-en-1-yl diphosphate reductase)  |
| Q94B74 | GO:0047631 (ADP-ribose diphosphatase)                               |
| Q94BT0 | GO:0046524 (sucrose-phosphate synthase)                             |
| Q94C06 |                                                                     |
| Q94F30 | GO:0016929 (SUMO-specific protease)                                 |
| Q94F47 | GO:0004842 (ubiquitin-protein ligase)                               |

|        |                                                        |
|--------|--------------------------------------------------------|
| Q94F74 |                                                        |
| Q94F88 | GO:0003886 (DNA (cytosine-5-)-methyltransferase)       |
| Q94FM7 |                                                        |
| Q94FS5 |                                                        |
| Q94FS6 |                                                        |
| Q94FY7 | GO:0009976 (tocopherol cyclase)                        |
| Q94G04 |                                                        |
| Q94ID7 |                                                        |
| Q94IG7 | GO:0004729 (protoporphyrinogen oxidase)                |
| Q94K43 | GO:0004499 (flavin-containing monooxygenase)           |
| Q95AJ2 |                                                        |
| Q95KV7 | GO:0008137 (NADH dehydrogenase (ubiquinone))           |
| Q95TI4 | GO:0004842 (ubiquitin-protein ligase)                  |
| Q95VY4 |                                                        |
| Q96242 | GO:0016836 (hydro-lyase)                               |
| Q96255 | GO:0004648 (phosphoserine transaminase)                |
| Q96266 | GO:0004364 (glutathione transferase)                   |
| Q96287 |                                                        |
| Q96330 | GO:0045431 (flavonol synthase)                         |
| Q963A7 |                                                        |
| Q96533 | GO:0080007 (S-nitrosoglutathione reductase)            |
| Q96552 |                                                        |
| Q969G3 | GO:0008080 (N-acetyltransferase)                       |
| Q969V5 | GO:0004842 (ubiquitin-protein ligase)                  |
| Q96B13 | GO:0008233 (peptidase)                                 |
| Q96DB2 | GO:0004407 (histone deacetylase)                       |
| Q96EG1 | GO:0004168 (dolichol kinase)                           |
| Q96FM1 | GO:0016788 (hydrolase activity, acting on ester bonds) |
| Q96HE7 | GO:0016491 (oxidoreductase)                            |
| Q96LR5 | GO:0042296 (ISG15 ligase)                              |
| Q96LZ3 |                                                        |
| Q96PH1 | GO:0016175 (superoxide-generating NADPH oxidase)       |
| Q96PM5 |                                                        |
| Q96Q15 | GO:0004674 (protein serine/threonine kinase)           |
| Q96Q89 | GO:0016887 (ATPase)                                    |
| Q99973 | GO:0003720 (telomerase)                                |
| Q99J57 | GO:0004478 (methionine adenosyltransferase)            |
| Q99K23 | GO:0016790 (thiolester hydrolase)                      |
| Q99KB8 | GO:0004416 (hydroxyacylglutathione hydrolase)          |
| Q99LB2 | GO:0001758 (retinal dehydrogenase)                     |
| Q99LX0 | GO:0051920 (peroxiredoxin)                             |
| Q99MD6 | GO:0004791 (thioredoxin-disulfide reductase)           |
| Q99NA5 | GO:0004449 (isocitrate dehydrogenase (NAD+))           |
| Q99P30 | GO:0003986 (acetyl-CoA hydrolase)                      |
| Q99PI5 | GO:0008195 (phosphatidate phosphatase)                 |
| Q9AQT8 |                                                        |
| Q9AR73 |                                                        |
| Q9AR92 |                                                        |
| Q9AV97 | GO:0008676 (3-deoxy-8-phosphooctulonate synthase)      |

|        |                                                                               |
|--------|-------------------------------------------------------------------------------|
| Q9AV98 |                                                                               |
| Q9AVE7 | GO:0009540 (zeaxanthin epoxidase)                                             |
| Q9AVK0 |                                                                               |
| Q9BMX8 |                                                                               |
| Q9BRQ8 | GO:0004174 (electron-transferring-flavoprotein dehydrogenase)                 |
| Q9BV79 | GO:0019166 (trans-2-enoyl-CoA reductase (NADPH))                              |
| Q9BVA0 | GO:0008568 (microtubule-severing ATPase)                                      |
| Q9BZC7 | GO:0016887 (ATPase)                                                           |
| Q9C1Z8 |                                                                               |
| Q9C550 | GO:0003852 (2-isopropylmalate synthase)                                       |
| Q9C5F5 | GO:0003887 (DNA-directed DNA polymerase)                                      |
| Q9C5G5 | GO:0043812 (phosphatidylinositol-4-phosphate phosphatase)                     |
| Q9C5J7 | GO:0003872 (6-phosphofructokinase)                                            |
| Q9C5J9 | GO:0003924 (GTPase)                                                           |
| Q9C5Q8 | GO:0008173 (RNA methyltransferase)                                            |
| Q9C5R8 | GO:0051920 (peroxiredoxin)                                                    |
| Q9C5S2 | GO:0004521 (endoribonuclease)                                                 |
| Q9C5U1 | GO:0004673 (protein histidine kinase)                                         |
| Q9C5U3 | GO:0016887 (ATPase)                                                           |
| Q9C5W3 | GO:0003951 (NAD <sup>+</sup> kinase)                                          |
| Q9C5X4 | GO:0018024 (histone-lysine N-methyltransferase)                               |
| Q9C5Y0 | GO:0004630 (phospholipase D)                                                  |
| Q9C6L5 | GO:0009922 (fatty acid elongase)                                              |
| Q9C7G1 | GO:0004842 (ubiquitin-protein ligase)                                         |
| Q9C7R6 | GO:0004842 (ubiquitin-protein ligase)                                         |
| Q9C867 | GO:0016301 (kinase)                                                           |
| Q9C907 |                                                                               |
| Q9C920 |                                                                               |
| Q9C958 | GO:0016301 (kinase)                                                           |
| Q9C9D0 |                                                                               |
| Q9C9P4 | GO:0004315 (3-oxoacyl-[acyl-carrier-protein] synthase)                        |
| Q9C9Q8 | GO:0008168 (methyltransferase)                                                |
| Q9CA67 | GO:0045550 (geranylgeranyl reductase)                                         |
| Q9CA75 | GO:0033843 (xyloglucan 6-xylosyltransferase)                                  |
| Q9CAD6 | GO:0008393 (fatty acid (omega-1)-hydroxylase)                                 |
| Q9CAF5 | GO:0042626 (ATPase activity, coupled to transmembrane movement of substances) |
| Q9CAK8 | GO:0008685 (2-C-methyl-D-erythritol 2,4-cyclodiphosphate synthase)            |
| Q9CAN1 | GO:0004252 (serine-type endopeptidase)                                        |
| Q9CAV6 | GO:0004672 (protein kinase)                                                   |
| Q9CPY7 | GO:0008233 (peptidase)                                                        |
| Q9CQD1 | GO:0003924 (GTPase)                                                           |
| Q9CR50 |                                                                               |
| Q9CRB3 | GO:0016787 (hydrolase)                                                        |
| Q9CXZ1 | GO:0008137 (NADH dehydrogenase (ubiquinone))                                  |
| Q9CYR6 | GO:0004614 (phosphoglucomutase)                                               |
| Q9D074 | GO:0004842 (ubiquitin-protein ligase)                                         |
| Q9D077 | GO:0003678 (DNA helicase)                                                     |
| Q9D358 | GO:0016791 (phosphatase)                                                      |



|        |                                                                            |
|--------|----------------------------------------------------------------------------|
| Q9D4B1 |                                                                            |
| Q9D593 | GO:0008553 (hydrogen-exporting ATPase activity, phosphorylative mechanism) |
| Q9D6Z0 | GO:0010302 (2-oxoglutarate-dependent dioxygenase)                          |
| Q9D892 | GO:0047429 (nucleoside-triphosphate diphosphatase)                         |
| Q9DGH5 | GO:0042083 (5,10-methylenetetrahydrofolate-dependent methyltransferase)    |
| Q9EPL5 | GO:0008233 (peptidase)                                                     |
| Q9EQY6 | GO:0000030 (mannosyltransferase)                                           |
| Q9ERI6 |                                                                            |
| Q9FE45 |                                                                            |
| Q9FEW9 |                                                                            |
| Q9FEY5 |                                                                            |
| Q9FEY7 |                                                                            |
| Q9FF66 | GO:0004842 (ubiquitin-protein ligase)                                      |
| Q9FFN4 | GO:0004565 (beta-galactosidase)                                            |
| Q9FFN7 | GO:0004143 (diacylglycerol kinase)                                         |
| Q9FFP9 | GO:0016301 (kinase)                                                        |
| Q9FG87 | GO:0009922 (fatty acid elongase)                                           |
| Q9FGC7 | GO:0009540 (zeaxanthin epoxidase)                                          |
| Q9FGF2 | GO:0047412 (N-(long-chain-acyl)ethanolamine deacylase)                     |
| Q9FGS4 | GO:0008987 (quinolinate synthetase A)                                      |
| Q9FGX1 | GO:0003878 (ATP citrate synthase)                                          |
| Q9FH02 | GO:0016887 (ATPase)                                                        |
| Q9FHT5 | GO:0047196 (long-chain-alcohol O-fatty-acyltransferase)                    |
| Q9FHX5 | GO:0042973 (glucan endo-1,3-beta-D-glucosidase)                            |
| Q9FI56 | GO:0004176 (ATP-dependent peptidase)                                       |
| Q9FI61 | GO:0004842 (ubiquitin-protein ligase)                                      |
| Q9FIE8 | GO:0048040 (UDP-glucuronate decarboxylase)                                 |
| Q9FJ82 | GO:0008839 (dihydrodipicolinate reductase)                                 |
| Q9FJI5 | GO:0004345 (glucose-6-phosphate dehydrogenase)                             |
| Q9FJM5 | GO:0004049 (anthranilate synthase)                                         |
| Q9FJP6 | GO:0004842 (ubiquitin-protein ligase)                                      |
| Q9FJT8 | GO:0010485 (H4 histone acetyltransferase)                                  |
| Q9FJV0 | GO:0004708 (MAP kinase kinase)                                             |
| Q9FK25 | GO:0047763 (caffeate O-methyltransferase)                                  |
| Q9FKG3 | GO:0003872 (6-phosphofructokinase)                                         |
| Q9FKL5 | GO:0004015 (adenosylmethionine-8-amino-7-oxononanoate transaminase)        |
| Q9FKS0 | GO:0004849 (uridine kinase)                                                |
| Q9FKW6 | GO:0003959 (NADPH dehydrogenase)                                           |
| Q9FKW8 |                                                                            |
| Q9FL28 | GO:0004675 (transmembrane receptor protein serine/threonine kinase)        |
| Q9FLF7 | GO:0004406 (H3/H4 histone acetyltransferase)                               |
| Q9FLG1 | GO:0009044 (xylan 1,4-beta-xylosidase)                                     |
| Q9FLN0 | GO:0016298 (lipase)                                                        |
| Q9FLP9 | GO:0010475 (galactose-1-phosphate guanylyltransferase (GDP))               |
| Q9FLW9 | GO:0004743 (pyruvate kinase)                                               |
| Q9FMJ0 | GO:0004430 (1-phosphatidylinositol 4-kinase)                               |
| Q9FMP3 |                                                                            |

|        |                                                                               |
|--------|-------------------------------------------------------------------------------|
| Q9FMW9 | GO:0010340 (carboxyl-O-methyltransferase)                                     |
| Q9FMX7 | GO:0008936 (nicotinamidase)                                                   |
| Q9FN02 | GO:0004722 (protein serine/threonine phosphatase)                             |
| Q9FN05 | GO:0015926 (glucosidase)                                                      |
| Q9FNA9 |                                                                               |
| Q9FNY7 | GO:0008534 (oxidized purine base lesion DNA N-glycosylase)                    |
| Q9FPE3 | GO:0004392 (heme oxygenase (decyclizing))                                     |
| Q9FPS9 | GO:0004843 (ubiquitin-specific protease)                                      |
| Q9FQ03 | GO:0004534 (5'-3' exoribonuclease)                                            |
| Q9FSD6 |                                                                               |
| Q9FT54 | GO:0004406 (H3/H4 histone acetyltransferase)                                  |
| Q9FT83 |                                                                               |
| Q9FUB7 | GO:0016210 (naringenin-chalcone synthase)                                     |
| Q9FUC2 |                                                                               |
| Q9FUP0 | GO:0016629 (12-oxophytodienoate reductase)                                    |
| Q9FV53 | GO:0042586 (peptide deformylase)                                              |
| Q9FVE1 |                                                                               |
| Q9FVF9 |                                                                               |
| Q9FX32 | GO:0016157 (sucrose synthase)                                                 |
| Q9FX43 | GO:0004708 (MAP kinase kinase)                                                |
| Q9FY48 | GO:0004842 (ubiquitin-protein ligase)                                         |
| Q9FYA6 | GO:0004084 (branched-chain-amino-acid transaminase)                           |
| Q9FYB3 | GO:0004672 (protein kinase)                                                   |
| Q9FYC2 | GO:0032441 (pheophorbide a oxygenase)                                         |
| Q9FYL6 | GO:0045703 (ketoreductase)                                                    |
| Q9FZ48 | GO:0004842 (ubiquitin-protein ligase)                                         |
| Q9GU36 |                                                                               |
| Q9GU37 |                                                                               |
| Q9H0N0 | GO:0003924 (GTPase)                                                           |
| Q9H2H8 |                                                                               |
| Q9H9B1 | GO:0018024 (histone-lysine N-methyltransferase)                               |
| Q9HBH5 |                                                                               |
| Q9IA93 |                                                                               |
| Q9JHW1 |                                                                               |
| Q9JIM4 | GO:0004721 (phosphoprotein phosphatase)                                       |
| Q9JIW8 | GO:0004844 (uracil DNA N-glycosylase)                                         |
| Q9JKB1 |                                                                               |
| Q9JKS8 | GO:0004035 (alkaline phosphatase)                                             |
| Q9JLZ3 | GO:0004300 (enoyl-CoA hydratase)                                              |
| Q9JMF7 | GO:0047874 (dolichyldiphosphatase)                                            |
| Q9KJG6 |                                                                               |
| Q9KTV8 | GO:0042626 (ATPase activity, coupled to transmembrane movement of substances) |
| Q9LD47 | GO:0004784 (superoxide dismutase)                                             |
| Q9LD80 |                                                                               |
| Q9LDA9 | GO:0031202 (RNA splicing factor activity, transesterification mechanism)      |
| Q9LDC0 | GO:0003755 (peptidyl-prolyl cis-trans isomerase)                              |
| Q9LDD8 | GO:0004485 (methylcrotonoyl-CoA carboxylase)                                  |
| Q9LDI3 | GO:0004672 (protein kinase)                                                   |

|        |                                                                                                                                                                                         |
|--------|-----------------------------------------------------------------------------------------------------------------------------------------------------------------------------------------|
| Q9LDR4 | GO:0050613 (delta14-sterol reductase)                                                                                                                                                   |
| Q9LDU6 | GO:0009918 (sterol delta7 reductase)                                                                                                                                                    |
| Q9LE59 | GO:0047262 (polygalacturonate 4-alpha-galacturonosyltransferase)                                                                                                                        |
| Q9LEH3 | GO:0004601 (peroxidase)                                                                                                                                                                 |
| Q9LET6 | GO:0080019 (fatty acyl-CoA reductase (alcohol-forming))                                                                                                                                 |
| Q9LF10 | GO:0031202 (RNA splicing factor activity, transesterification mechanism)                                                                                                                |
| Q9LFA2 | GO:0004672 (protein kinase)                                                                                                                                                             |
| Q9LFF9 | GO:0004427 (inorganic diphosphatase)                                                                                                                                                    |
| Q9LFJ8 | GO:0047213 (anthocyanidin 3-O-glucosyltransferase)                                                                                                                                      |
| Q9LFT8 | GO:0016301 (kinase)                                                                                                                                                                     |
| Q9LIB2 | GO:0004645 (phosphorylase)                                                                                                                                                              |
| Q9LIS3 |                                                                                                                                                                                         |
| Q9LJB4 | GO:0050736 (O-malonyltransferase)                                                                                                                                                       |
| Q9LJK1 |                                                                                                                                                                                         |
| Q9LJL3 | GO:0004222 (metalloendopeptidase)                                                                                                                                                       |
| Q9LJZ5 | GO:0004842 (ubiquitin-protein ligase)                                                                                                                                                   |
| Q9LK23 | GO:0004345 (glucose-6-phosphate dehydrogenase)                                                                                                                                          |
| Q9LK35 | GO:0004672 (protein kinase)                                                                                                                                                             |
| Q9LK64 | GO:0042626 (ATPase activity, coupled to transmembrane movement of substances)                                                                                                           |
| Q9LKF8 |                                                                                                                                                                                         |
| Q9LKH8 |                                                                                                                                                                                         |
| Q9LKI5 | GO:0000014 (single-stranded DNA specific endodeoxyribonuclease)                                                                                                                         |
| Q9LKJ1 | GO:0003860 (3-hydroxyisobutyryl-CoA hydrolase)                                                                                                                                          |
| Q9LKJ4 | GO:0004021 (alanine transaminase)                                                                                                                                                       |
| Q9LL84 | GO:0003910 (DNA ligase (ATP))                                                                                                                                                           |
| Q9LMI0 | GO:0004805 (trehalose-phosphatase)                                                                                                                                                      |
| Q9LMM1 | GO:0008393 (fatty acid (omega-1)-hydroxylase)                                                                                                                                           |
| Q9LN71 | GO:0004842 (ubiquitin-protein ligase)                                                                                                                                                   |
| Q9LNJ4 | GO:0016709 (oxidoreductase activity, acting on paired donors, with incorporation or reduction of molecular oxygen, NADH or NADPH as one donor, and incorporation of one atom of oxygen) |
| Q9LPG6 | GO:0050377 (UDP-glucose 4,6-dehydratase)                                                                                                                                                |
| Q9LPS1 | GO:0008865 (fructokinase)                                                                                                                                                               |
| Q9LQ04 | GO:0008831 (dTDP-4-dehydrorhamnose reductase)                                                                                                                                           |
| Q9LQF2 | GO:0004564 (beta-fructofuranosidase)                                                                                                                                                    |
| Q9LR30 | GO:0047958 (glycine transaminase)                                                                                                                                                       |
| Q9LR44 | GO:0080002 (UDP-glucose:4-aminobenzoate acylglucosyltransferase)                                                                                                                        |
| Q9LR47 | GO:0046030 (inositol trisphosphate phosphatase)                                                                                                                                         |
| Q9LR75 | GO:0004109 (coproporphyrinogen oxidase)                                                                                                                                                 |
| Q9LR78 | GO:0004722 (protein serine/threonine phosphatase)                                                                                                                                       |
| Q9LRB0 | GO:0017050 (D-erythro-sphingosine kinase)                                                                                                                                               |
| Q9LRC8 |                                                                                                                                                                                         |
| Q9LRR9 | GO:0008891 (glycolate oxidase)                                                                                                                                                          |
| Q9LRZ5 |                                                                                                                                                                                         |
| Q9LS14 | GO:0004842 (ubiquitin-protein ligase)                                                                                                                                                   |
| Q9LSA6 | GO:0004842 (ubiquitin-protein ligase)                                                                                                                                                   |
| Q9LSP7 | GO:0004842 (ubiquitin-protein ligase)                                                                                                                                                   |
| Q9LSQ4 | GO:0010279 (indole-3-acetic acid amido synthetase)                                                                                                                                      |

|        |                                                                                                        |
|--------|--------------------------------------------------------------------------------------------------------|
| Q9LSQ5 | GO:0016655 (oxidoreductase activity, acting on NADH or NADPH, quinone or similar compound as acceptor) |
| Q9LSS7 | GO:0019784 (NEDD8-specific protease)                                                                   |
| Q9LSZ9 | GO:0004758 (serine C-palmitoyltransferase)                                                             |
| Q9LT10 | GO:0004091 (carboxylesterase)                                                                          |
| Q9LTB2 | GO:0008757 (S-adenosylmethionine-dependent methyltransferase)                                          |
| Q9LTQ0 | GO:0004525 (ribonuclease III)                                                                          |
| Q9LTR9 | GO:0019107 (myristoyltransferase)                                                                      |
| Q9LTX3 | GO:0004733 (pyridoxamine-phosphate oxidase)                                                            |
| Q9LU10 | GO:0008233 (peptidase)                                                                                 |
| Q9LU15 | GO:0009927 (histidine phosphotransfer kinase)                                                          |
| Q9LU67 | GO:0004609 (phosphatidylserine decarboxylase)                                                          |
| Q9LUF3 | GO:0019948 (SUMO activating enzyme)                                                                    |
| Q9LUL7 | GO:0030599 (pectinesterase)                                                                            |
| Q9LV03 | GO:0016040 (glutamate synthase (NADH))                                                                 |
| Q9LV91 |                                                                                                        |
| Q9LVB8 | GO:0004091 (carboxylesterase)                                                                          |
| Q9LVM4 | GO:0047627 (adenylylsulfatase)                                                                         |
| Q9LWC0 | GO:0004518 (nuclease)                                                                                  |
| Q9LX33 | GO:0008318 (protein prenyltransferase)                                                                 |
| Q9LXD7 | GO:0004406 (H3/H4 histone acetyltransferase)                                                           |
| Q9LXE5 | GO:0003886 (DNA (cytosine-5-)-methyltransferase)                                                       |
| Q9LXL5 | GO:0016157 (sucrose synthase)                                                                          |
| Q9LY74 | GO:0051741 (2-methyl-6-phytyl-1,4-benzoquinone methyltransferase)                                      |
| Q9LYT1 | GO:0046592 (polyamine oxidase)                                                                         |
| Q9LZ76 | GO:0010276 (phytol kinase)                                                                             |
| Q9LZI2 | GO:0048040 (UDP-glucuronate decarboxylase)                                                             |
| Q9LZJ3 | GO:0035252 (UDP-xylosyltransferase)                                                                    |
| Q9LZR3 | GO:0051753 (mannan synthase)                                                                           |
| Q9LZV4 | GO:0004672 (protein kinase)                                                                            |
| Q9M071 | GO:0080019 (fatty acyl-CoA reductase (alcohol-forming))                                                |
| Q9M076 | GO:0003872 (6-phosphofructokinase)                                                                     |
| Q9M099 | GO:0004185 (serine-type carboxypeptidase)                                                              |
| Q9M0B6 | GO:0050378 (UDP-glucuronate 4-epimerase)                                                               |
| Q9M0F9 | GO:0003872 (6-phosphofructokinase)                                                                     |
| Q9M0V0 |                                                                                                        |
| Q9M0X9 | GO:0004321 (fatty-acyl-CoA synthase)                                                                   |
| Q9M111 | GO:0016157 (sucrose synthase)                                                                          |
| Q9M156 | GO:0035251 (UDP-glucosyltransferase)                                                                   |
| Q9M1K2 | GO:0016308 (1-phosphatidylinositol-4-phosphate 5-kinase)                                               |
| Q9M1W4 | GO:0008898 (homocysteine S-methyltransferase)                                                          |
| Q9M2E2 | GO:0047504 ((-)-menthol dehydrogenase)                                                                 |
| Q9M2U2 | GO:0019166 (trans-2-enoyl-CoA reductase (NADPH))                                                       |
| Q9M3D8 | GO:0004675 (transmembrane receptor protein serine/threonine kinase)                                    |
| Q9M401 | GO:0004084 (branched-chain-amino-acid transaminase)                                                    |
| Q9M4S1 |                                                                                                        |
| Q9M571 |                                                                                                        |
| Q9M591 | GO:0048529 (magnesium-protoporphyrin IX monomethyl ester (oxidative) cyclase)                          |

|        |                                                                                                                           |
|--------|---------------------------------------------------------------------------------------------------------------------------|
| Q9M5J0 |                                                                                                                           |
| Q9M643 | GO:0047793 (cycloeucaleenol cycloisomerase)                                                                               |
| Q9M685 |                                                                                                                           |
| Q9M7I7 | GO:0047746 (chlorophyllase)                                                                                               |
| Q9M7L9 |                                                                                                                           |
| Q9M7T0 | GO:0004601 (peroxidase)                                                                                                   |
| Q9M8S8 | GO:0010347 (L-galactose-1-phosphate phosphatase)                                                                          |
| Q9M8Y0 | GO:0016757 (transferase activity, transferring glycosyl groups)                                                           |
| Q9MA43 | GO:0042800 (histone lysine N-methyltransferase activity (H3-K4 specific))                                                 |
| Q9MAM3 | GO:0009922 (fatty acid elongase)                                                                                          |
| Q9MAT5 | GO:0035242 (protein-arginine omega-N asymmetric methyltransferase)                                                        |
| Q9MBA1 | GO:0010277 (chlorophyllide a oxygenase)                                                                                   |
| Q9N0A4 |                                                                                                                           |
| Q9N0E7 | GO:0008265 (Mo-molybdopterin cofactor sulfurase)                                                                          |
| Q9NB32 |                                                                                                                           |
| Q9NBB4 | GO:0004687 (myosin light chain kinase)                                                                                    |
| Q9NDA1 |                                                                                                                           |
| Q9NDA2 |                                                                                                                           |
| Q9NDA3 |                                                                                                                           |
| Q9NHC6 |                                                                                                                           |
| Q9NKV5 |                                                                                                                           |
| Q9NPC4 | GO:0008378 (galactosyltransferase)                                                                                        |
| Q9NR19 | GO:0003987 (acetate-CoA ligase)                                                                                           |
| Q9NRD8 | GO:0016174 (NAD(P)H oxidase)                                                                                              |
| Q9NRK6 |                                                                                                                           |
| Q9NS00 | GO:0016263 (glycoprotein-N-acetylgalactosamine 3-beta-galactosyltransferase)                                              |
| Q9NSD9 |                                                                                                                           |
| Q9NT62 | GO:0019787 (small conjugating protein ligase)                                                                             |
| Q9NY43 |                                                                                                                           |
| Q9NYG5 | GO:0004842 (ubiquitin-protein ligase)                                                                                     |
| Q9NYU2 | GO:0003980 (UDP-glucose:glycoprotein glucosyltransferase)                                                                 |
| Q9NZL9 |                                                                                                                           |
| Q9P0J0 | GO:0008137 (NADH dehydrogenase (ubiquinone))                                                                              |
| Q9P777 | GO:0004399 (histidinol dehydrogenase)                                                                                     |
| Q9P7F2 | GO:0008131 (amine oxidase)                                                                                                |
| Q9P7M3 | GO:0016894 (endonuclease activity, active with either ribo- or deoxyribonucleic acids and producing 3'-phosphomonoesters) |
| Q9P9M8 |                                                                                                                           |
| Q9QUL6 | GO:0016887 (ATPase)                                                                                                       |
| Q9QXV1 | GO:0004842 (ubiquitin-protein ligase)                                                                                     |
| Q9QY36 | GO:0008080 (N-acetyltransferase)                                                                                          |
| Q9QYF1 |                                                                                                                           |
| Q9QYT7 |                                                                                                                           |
| Q9R0E1 |                                                                                                                           |
| Q9R0X4 | GO:0016291 (acyl-CoA thioesterase)                                                                                        |
| Q9RAT0 |                                                                                                                           |
| Q9RHA2 |                                                                                                                           |
| Q9S702 | GO:0004072 (aspartate kinase)                                                                                             |

|        |                                                                              |
|--------|------------------------------------------------------------------------------|
| Q9S713 | GO:0004672 (protein kinase)                                                  |
| Q9S762 | GO:0003879 (ATP phosphoribosyltransferase)                                   |
| Q9S7B5 | GO:0004795 (threonine synthase)                                              |
| Q9S7D1 | GO:0046480 (galactolipid galactosyltransferase)                              |
| Q9S7E9 |                                                                              |
| Q9S7N5 |                                                                              |
| Q9S7Y7 | GO:0046556 (alpha-N-arabinofuranosidase)                                     |
| Q9S816 | GO:0004629 (phospholipase C)                                                 |
| Q9S818 | GO:0045486 (naringenin 3-dioxygenase)                                        |
| Q9S850 | GO:0008482 (sulfite oxidase)                                                 |
| Q9SA18 | GO:0004412 (homoserine dehydrogenase)                                        |
| Q9SA34 | GO:0003938 (IMP dehydrogenase)                                               |
| Q9SA77 | GO:0050373 (UDP-arabinose 4-epimerase)                                       |
| Q9SA96 | GO:0047769 (arogenate dehydratase)                                           |
| Q9SAA1 | GO:0045547 (dehydrodolichyl diphosphate synthase)                            |
| Q9SAA5 | GO:0009011 (starch synthase)                                                 |
| Q9SB48 | GO:0003958 (NADPH-hemoprotein reductase)                                     |
| Q9SBJ1 | GO:0009927 (histidine phosphotransfer kinase)                                |
| Q9SC14 |                                                                              |
| Q9SCX8 | GO:0016791 (phosphatase)                                                     |
| Q9SCY0 | GO:0004614 (phosphoglucomutase)                                              |
| Q9SCZ4 | GO:0004672 (protein kinase)                                                  |
| Q9SD85 | GO:0016711 (flavonoid 3'-monooxygenase)                                      |
| Q9SDS7 | GO:0046961 (hydrogen ion transporting ATPase activity, rotational mechanism) |
| Q9SDY5 | GO:0019787 (small conjugating protein ligase)                                |
| Q9SEE5 | GO:0004335 (galactokinase)                                                   |
| Q9SEI2 | GO:0016887 (ATPase)                                                          |
| Q9SEI3 | GO:0016887 (ATPase)                                                          |
| Q9SEI4 | GO:0016887 (ATPase)                                                          |
| Q9SEX2 |                                                                              |
| Q9SG80 | GO:0046556 (alpha-N-arabinofuranosidase)                                     |
| Q9SGH6 | GO:0016165 (lipoxygenase)                                                    |
| Q9SHH8 | GO:0004364 (glutathione transferase)                                         |
| Q9SI64 |                                                                              |
| Q9SID3 | GO:0004416 (hydroxyacylglutathione hydrolase)                                |
| Q9SJ44 | GO:0004842 (ubiquitin-protein ligase)                                        |
| Q9SJA7 | GO:0008115 (sarcosine oxidase)                                               |
| Q9SJE2 | GO:0016297 (acyl-[acyl-carrier-protein] hydrolase)                           |
| Q9SJF3 | GO:0050072 (m7G(5')pppN diphosphatase)                                       |
| Q9SJH7 | GO:0004108 (citrate (Si)-synthase)                                           |
| Q9SJT1 | GO:0019948 (SUMO activating enzyme)                                          |
| Q9SK82 |                                                                              |
| Q9SKB3 | GO:0004649 (poly(ADP-ribose) glycohydrolase)                                 |
| Q9SKE2 | GO:0003824 (catalytic)                                                       |
| Q9SL05 | GO:0009055 (electron carrier)                                                |
| Q9SL42 | GO:0003755 (peptidyl-prolyl cis-trans isomerase)                             |
| Q9SL79 | GO:0031202 (RNA splicing factor activity, transesterification mechanism)     |
| Q9SLA8 | GO:0016631 (enoyl-[acyl-carrier-protein] reductase)                          |



|         |                                                                     |
|---------|---------------------------------------------------------------------|
| Q9SLD2  | GO:0004144 (diacylglycerol O-acyltransferase)                       |
| Q9SLG9  | GO:0016308 (1-phosphatidylinositol-4-phosphate 5-kinase)            |
| Q9SMB7  |                                                                     |
| Q9SMC1  |                                                                     |
| Q9SMG6  |                                                                     |
| Q9SMN0  | GO:0004091 (carboxylesterase)                                       |
| Q9SMU8  | GO:0004601 (peroxidase)                                             |
| Q9SMW0  | GO:0016161 (beta-amylase)                                           |
| Q9SMZ4  | GO:0047130 (saccharopine dehydrogenase (NADP+, L-lysine-forming))   |
| Q9SN27  | GO:0004842 (ubiquitin-protein ligase)                               |
| Q9SNC6  | GO:0004842 (ubiquitin-protein ligase)                               |
| Q9SP05  |                                                                     |
| Q9SP19  |                                                                     |
| Q9SP20  |                                                                     |
| Q9SPD6  | GO:0004784 (superoxide dismutase)                                   |
| Q9SPM5  | GO:0016887 (ATPase)                                                 |
| Q9SPP9  |                                                                     |
| Q9SQI8  | GO:0004742 (dihydrolipoyllysine-residue acetyltransferase)          |
| Q9SQJ1  |                                                                     |
| Q9SQT6  | GO:0004842 (ubiquitin-protein ligase)                               |
| Q9SR37  | GO:0008422 (beta-glucosidase)                                       |
| Q9SR52  | GO:0009039 (urease)                                                 |
| Q9SR96  | GO:0016491 (oxidoreductase)                                         |
| Q9SRQ2  | GO:0010327 (acetyl CoA:(Z)-3-hexen-1-ol acetyltransferase)          |
| Q9SRQ7  | GO:0004629 (phospholipase C)                                        |
| Q9SRS9  | GO:0004842 (ubiquitin-protein ligase)                               |
| Q9SRT0  | GO:0004842 (ubiquitin-protein ligase)                               |
| Q9SRW9  | GO:0047517 (1,4-beta-D-xylan synthase)                              |
| Q9SS01  | GO:0018858 (benzoate-CoA ligase)                                    |
| Q9SSB5  | GO:0016887 (ATPase)                                                 |
| Q9SSV1  |                                                                     |
| Q9ST02  |                                                                     |
| Q9ST03  |                                                                     |
| Q9STG9  | GO:0004044 (amidophosphoribosyltransferase)                         |
| Q9SU38  |                                                                     |
| Q9SU94  | GO:0016274 (protein-arginine N-methyltransferase)                   |
| Q9SVC6  | GO:0004842 (ubiquitin-protein ligase)                               |
| Q9SVP6  | GO:0010283 (pinorexinol reductase)                                  |
| Q9SW18  | GO:0046406 (magnesium protoporphyrin IX methyltransferase)          |
| Q9SWW6  | GO:0016759 (cellulose synthase)                                     |
| Q9S XK4 |                                                                     |
| Q9SYK9  | GO:0035251 (UDP-glucosyltransferase)                                |
| Q9SYM4  | GO:0003825 (alpha,alpha-trehalose-phosphate synthase (UDP-forming)) |
| Q9SYM5  | GO:0050377 (UDP-glucose 4,6-dehydratase)                            |
| Q9SYM7  |                                                                     |
| Q9SYT0  | GO:0004601 (peroxidase)                                             |
| Q9SZC9  |                                                                     |
| Q9SZD4  | GO:0016887 (ATPase)                                                 |
| Q9SZZ8  | GO:0010291 (carotene beta-ring hydroxylase)                         |



|        |                                                                      |
|--------|----------------------------------------------------------------------|
| Q9T0A7 | GO:0003978 (UDP-glucose 4-epimerase)                                 |
| Q9TV77 |                                                                      |
| Q9U022 |                                                                      |
| Q9U5A1 |                                                                      |
| Q9U794 |                                                                      |
| Q9UBP6 | GO:0008176 (tRNA (guanine-N7-)-methyltransferase)                    |
| Q9UGM6 |                                                                      |
| Q9UHY7 | GO:0043874 (acireductone synthase)                                   |
| Q9UIC8 | GO:0003880 (C-terminal protein carboxyl methyltransferase)           |
| Q9UJ70 |                                                                      |
| Q9UJ83 | GO:0016830 (carbon-carbon lyase)                                     |
| Q9UK59 | GO:0008419 (RNA lariat debranching enzyme)                           |
| Q9UKM7 |                                                                      |
| Q9UKV5 | GO:0004842 (ubiquitin-protein ligase)                                |
| Q9UMS4 | GO:0004842 (ubiquitin-protein ligase)                                |
| Q9UNW1 |                                                                      |
| Q9UR05 |                                                                      |
| Q9URQ3 | GO:0008251 (tRNA-specific adenosine deaminase)                       |
| Q9US25 | GO:0008094 (DNA-dependent ATPase)                                    |
| Q9UT74 | GO:0004409 (homoaconitate hydratase)                                 |
| Q9V3G7 | GO:0004175 (endopeptidase)                                           |
| Q9V3H2 | GO:0004175 (endopeptidase)                                           |
| Q9V3I5 | GO:0035175 (histone serine kinase activity (H3-S10 specific))        |
| Q9V3P6 | GO:0004175 (endopeptidase)                                           |
| Q9V3Z4 | GO:0004175 (endopeptidase)                                           |
| Q9V405 | GO:0004175 (endopeptidase)                                           |
| Q9V429 | GO:0015036 (disulfide oxidoreductase)                                |
| Q9V7Y2 | GO:0008117 (sphinganine-1-phosphate aldolase)                        |
| Q9VBL1 | GO:0042500 (aspartic endopeptidase activity, intramembrane cleaving) |
| Q9VJN9 | GO:0004175 (endopeptidase)                                           |
| Q9VMQ9 |                                                                      |
| Q9VMW9 | GO:0008446 (GDP-mannose 4,6-dehydratase)                             |
| Q9VPQ7 | GO:0042500 (aspartic endopeptidase activity, intramembrane cleaving) |
| Q9VQ61 | GO:0004069 (aspartate transaminase)                                  |
| Q9VT65 | GO:0004198 (calcium-dependent cysteine-type endopeptidase)           |
| Q9VUX3 | GO:0019213 (deacetylase)                                             |
| Q9VW54 | GO:0004175 (endopeptidase)                                           |
| Q9VZQ8 | GO:0004601 (peroxidase)                                              |
| Q9W1X8 | GO:0050577 (GDP-L-fucose synthase)                                   |
| Q9W3H4 | GO:0004090 (carbonyl reductase (NADPH))                              |
| Q9W3Z3 | GO:0008453 (alanine-glyoxylate transaminase)                         |
| Q9W5E1 | GO:0004842 (ubiquitin-protein ligase)                                |
| Q9WTV7 | GO:0004842 (ubiquitin-protein ligase)                                |
| Q9WYR4 |                                                                      |
| Q9WZ49 |                                                                      |
| Q9X0Y1 |                                                                      |
| Q9XES5 |                                                                      |
| Q9XF67 | GO:0004676 (3-phosphoinositide-dependent protein kinase)             |
| Q9XGN4 |                                                                      |

|        |                                                                          |
|--------|--------------------------------------------------------------------------|
| Q9XHE8 |                                                                          |
| Q9XI60 | GO:0008195 (phosphatidate phosphatase)                                   |
| Q9XIA9 | GO:0004467 (long-chain-fatty-acid-CoA ligase)                            |
| Q9XIL5 | GO:0031202 (RNA splicing factor activity, transesterification mechanism) |
| Q9XIS5 |                                                                          |
| Q9XZ08 | GO:0008375 (acetylglucosaminyltransferase)                               |
| Q9XZ58 | GO:0019781 (NEDD8 activating enzyme)                                     |
| Q9XZG5 |                                                                          |
| Q9Y230 | GO:0016887 (ATPase)                                                      |
| Q9Y259 |                                                                          |
| Q9Y3E5 |                                                                          |
| Q9Y4K3 | GO:0004842 (ubiquitin-protein ligase)                                    |
| Q9Y4P1 | GO:0008234 (cysteine-type peptidase)                                     |
| Q9Y725 |                                                                          |
| Q9Y751 |                                                                          |
| Q9Y7P1 | GO:0015035 (protein disulfide oxidoreductase)                            |
| Q9Z2I2 | GO:0003755 (peptidyl-prolyl cis-trans isomerase)                         |
| Q9Z2V5 | GO:0004407 (histone deacetylase)                                         |
| Q9Z325 | GO:0004582 (dolichyl-phosphate beta-D-mannosyltransferase)               |
| Q9Z714 |                                                                          |
| Q9ZNV9 | GO:0009927 (histidine phosphotransfer kinase)                            |
| Q9ZP23 |                                                                          |
| Q9ZPM3 |                                                                          |
| Q9ZPV8 | GO:0004595 (pantetheine-phosphate adenylyltransferase)                   |
| Q9ZQ31 | GO:0004713 (protein tyrosine kinase)                                     |
| Q9ZQ94 | GO:0046527 (glucosyltransferase)                                         |
| Q9ZQ95 | GO:0035251 (UDP-glucosyltransferase)                                     |
| Q9ZQ99 | GO:0035251 (UDP-glucosyltransferase)                                     |
| Q9ZQC6 | GO:0042285 (xylosyltransferase)                                          |
| Q9ZQH0 | GO:0004140 (dephospho-CoA kinase)                                        |
| Q9ZQN5 | GO:0016301 (kinase)                                                      |
| Q9ZS50 |                                                                          |
| Q9ZSK1 | GO:0050342 (tocopherol O-methyltransferase)                              |
| Q9ZSP7 |                                                                          |
| Q9ZSS6 | GO:0004794 (L-threonine ammonia-lyase)                                   |
| Q9ZT48 | GO:0004057 (arginyltransferase)                                          |
| Q9ZTP4 |                                                                          |
| Q9ZTS1 |                                                                          |
| Q9ZUB3 | GO:0004766 (spermidine synthase)                                         |
| Q9ZUU1 | GO:0004017 (adenylate kinase)                                            |
| Q9ZUX1 | GO:0008393 (fatty acid (omega-1)-hydroxylase)                            |
| Q9ZUY3 | GO:0047769 (arogenate dehydratase)                                       |
| Q9ZUY6 | GO:0048040 (UDP-glucuronate decarboxylase)                               |
| Q9ZVI9 | GO:0004306 (ethanolamine-phosphate cytidyltransferase)                   |
| Q9ZW86 | GO:0004656 (procollagen-proline 4-dioxygenase)                           |
| Q9ZWQ9 |                                                                          |
